# Supplementary material
Source: PubMed Central journal article supplement (PMC3580044)
Supplement: NIHMS422812-supplement-Supporting_Information.pdf [file NIHMS422812-supplement-Supporting_Information.pdf]

# Supporting Information

## Table of Contents

|                                                                                         |              |
|-----------------------------------------------------------------------------------------|--------------|
| General.....                                                                            | S-2          |
| General Procedure for the Synthesis of Alkynoates <i>via</i> Vinylogous Reactivity..... | S-3          |
| Optimization of Conditions for the Asymmetric Alkynoate Synthesis.....                  | S-16         |
| General Procedure for the Asymmetric Alkynoate Synthesis.....                           | S-19         |
| General Procedure for the Deprotection of the Disiloxyketal Alkynoate Products.....     | S-22         |
| References.....                                                                         | S-27         |
| <sup>1</sup> H and <sup>13</sup> C Spectra for all New Compounds .....                  | S-28 to S-49 |
| Chiral HPLC Traces for all New Compounds.....                                           | S-50 to S-54 |
| X-Ray Crystallographic Data for Compound <b>3</b> .....                                 | S-55         |

**General Method.** All reactions were conducted in flame-dried glassware under an inert atmosphere of dry argon. Flash chromatography was performed on silica gel 60 (230-400 mesh). Thin layer chromatography (TLC) was performed on aluminum backed plates, pre-coated with silica gel (0.25 mm, 60 F254) and developed using standard visualizing agents: UV fluorescence (254 nm) and potassium permanganate.  $^1\text{H}$  NMR spectra were recorded on Varian Nuclear Magnetic Resonance spectrometers at 600, 500 or 400 MHz. The NMR data are reported as follows: chemical shift (in ppm on the  $\delta$  scale relative to  $\delta\text{H}$  7.26 for the residual protons in  $\text{CDCl}_3$  and  $\delta\text{H}$  7.16 for the residual protons in  $\text{C}_6\text{D}_6$ ), multiplicity (s = singlet, d = doublet, t = triplet, q = quartet, m = multiplet, br = broad), coupling constant ( $J/\text{Hz}$ ) and integration.  $^{13}\text{C}$  NMR spectra were recorded at 150 or 100 MHz with complete proton decoupling using the given solvent as an internal standard ( $\text{CDCl}_3$ ,  $\delta = 77.0$  and  $\text{C}_6\text{D}_6$ ,  $\delta = 128.0$ ). Mass spectral determinations were carried out by APCI/ESI as ionization source. Melting points are uncorrected. Infrared spectral data are reported in units of  $\text{cm}^{-1}$ . Optical rotations were measured on a JASCO P-2000 polarimeter.

**Materials.**  $\text{Rh}_2(\text{S-PTAD})_4$ ,<sup>1</sup>  $\text{Rh}_2(\text{S-NTTL})_4$ ,<sup>2</sup>  $\text{Rh}_2(\text{S-PTTL})_4$ ,<sup>3</sup>  $\text{Rh}_2(\text{R-BNP})_4$ ,<sup>4</sup>  $\text{Rh}_2(\text{S-BTPCP})_4$ ,<sup>5</sup>  $\text{Rh}_2(\text{S-TBPTTL})_4$ <sup>6</sup> were prepared according to the literature procedures and lyophilized using a SP VirTis BenchTop K freeze dryer.  $\text{Rh}_2(\text{esp})_2$  was purchased from Aldrich. Siloxyvinyl diazoacetates **2**,<sup>7</sup> **4**,<sup>8</sup> and **5**<sup>9</sup> were synthesized according to literature procedures. Solvents were obtained from a Grubbs-type solvent purification system.

### General Procedure for the Synthesis of Alkynoates *via* Vinylogous Reactivity

A solution of siloxyvinyldiazoacetate (1.0 mmol, 2.0 equiv) in 6 mL of dried degassed DCM was added by syringe pump over 3 h at room temperature to a flame-dried 25 mL flask containing Rh<sub>2</sub>(esp)<sub>2</sub> (7.7 mg, 0.02 equiv) and enol ethers (0.5 mmol, 1.0 equiv) in 6 mL of dried degassed DCM under an argon atmosphere. The solution was stirred at room temperature for an additional 1 h. The mixture was concentrated under reduced pressure and purified by flash chromatography (pentane/Et<sub>2</sub>O) on silica gel to yield the product.

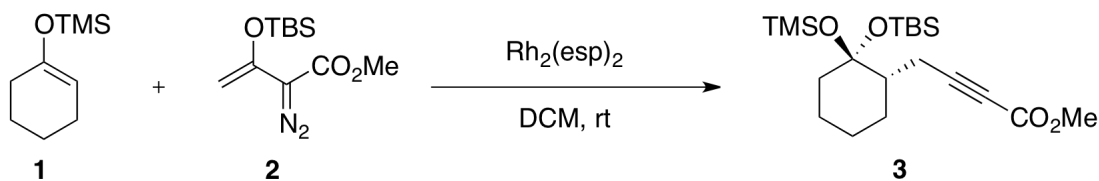

**Methyl 4-((1SR,2SR)-2-((*tert*-butyldimethylsilyl)oxy)-2-((trimethylsilyl)oxy)cyclohexyl) but-2-ynoate 3:** Derived from methyl 3-((*tert*-butyldimethylsilyl)oxy)-2-diazobut-3-enoate **2** (256 mg, 1.0 mmol, 2.0 equiv) and (cyclohex-1-en-1-yloxy)trimethylsilane **1** (85 mg, 0.5 mmol, 1.0 equiv), and purified through column chromatography (30/1 pentane/Et<sub>2</sub>O) on silica gel to provide **3** as a colorless oil which crystallized on standing (0.105 g, 53% yield). <sup>1</sup>H NMR (500 MHz, CDCl<sub>3</sub>): δ 3.75 (s, 3H), 2.71 (dd, *J* = 17.5, 3.0 Hz, 1H), 2.11 (dd, *J* = 17.5, 10.5 Hz, 1H), 1.90-1.93 (m, 1H), 1.81-1.84 (m, 1H), 1.67-1.70 (m, 1H), 1.50-1.61 (m, 3H), 1.42-1.48 (m, 1H), 1.12-1.29 (m, 2H), 0.86 (s, 9H), 0.16 (s, 9H), 0.09 (s, 3H), 0.04 (s, 3H); <sup>13</sup>C NMR (100 Hz, CDCl<sub>3</sub>): δ 154.5, 99.4, 90.8, 73.3, 52.7, 47.9, 41.8, 29.4, 26.2 (3 × C), 25.7, 24.0, 19.0, 18.3, 2.2 (3 × C), -2.3, -2.8; IR (neat): 2934, 2240, 1709, 1435, 1246,

1049, 806  $\text{cm}^{-1}$ ; HRMS (ESI) calc. for  $\text{C}_{20}\text{H}_{38}\text{O}_4\text{Si}_2$  ( $\text{M}+\text{Na}$ ) $^+$  421.2201 found 421.2200;  
M.p. 50-52  $^{\circ}\text{C}$ .

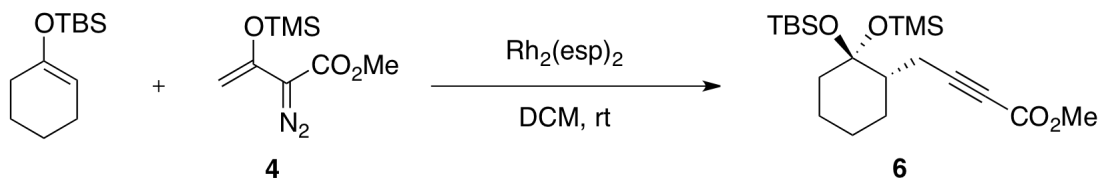

**Methyl 4-((1S,2R)-2-((tert-butyl(dimethyl)silyloxy)-2-((trimethylsilyloxy)cyclohexyl) but-2-ynoate 6:** Derived from methyl 2-diazo-3-((trimethylsilyloxy)but-3-enoate **4** (214 mg, 1.0 mmol, 2.0 equiv) and *tert*-butyl(cyclohex-1-en-1-yloxy)dimethyl silane (106 mg, 0.5 mmol, 1.0 equiv), and purified through column chromatography (30/1 pentane/ $\text{Et}_2\text{O}$ ) on silica gel to provide **6** as a colorless oil (98 mg, 49% yield).  $^1\text{H}$  NMR (600 MHz,  $\text{CDCl}_3$ ):  $\delta$  3.75 (s, 3H), 2.76 (dd,  $J = 17.4, 3.0$  Hz, 1H), 2.18 (dd,  $J = 17.4, 10.8$  Hz, 1H), 1.88-1.93 (m, 1H), 1.81-1.86 (m, 1H), 1.56-1.68 (m, 3H), 1.46-1.52 (m, 2H), 1.25 (qd,  $J = 12.6, 3.0$  Hz, 1H), 1.12-1.20 (m, 1H), 0.92 (s, 9H), 0.15 (s, 6H), 0.12 (s, 9H);  $^{13}\text{C}$  NMR (100 MHz,  $\text{CDCl}_3$ ):  $\delta$  154.4, 99.7, 90.6, 73.2, 52.5, 47.2, 41.4, 29.0, 26.1 ( $3 \times \text{C}$ ), 25.2, 23.9, 18.6, 18.4, 1.9 ( $3 \times \text{C}$ ), -1.8, -2.6; IR (neat): 2934, 2237, 1716, 1246, 1049, 833, 729  $\text{cm}^{-1}$ ; HRMS (ESI) calc. for  $\text{C}_{20}\text{H}_{38}\text{O}_4\text{Si}_2$  ( $\text{M}+\text{Na}$ ) $^+$  421.2201 found 421.2200.

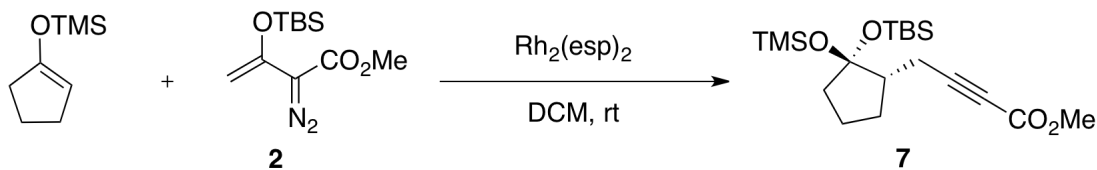

**Methyl 4-((1SR,2SR)-2-((tert-butyldimethylsilyloxy)-2-((trimethylsilyloxy)cyclopentyl)but-2-ynoate 7:** Derived from methyl 3-((tert-butyldimethylsilyloxy)-2-diazo)but-3-enoate **2** (256 mg, 1.0 mmol, 2.0 equiv) and (cyclopent-1-en-1-yl)oxy)trimethylsilane (99.2 mg, 0.5 mmol, 1.0 equiv), and purified through column chromatography (30/1 pentane/Et<sub>2</sub>O, R<sub>f</sub>: 0.42) on silica gel to provide **7** as a colorless oil (0.153 g, 79% yield). <sup>1</sup>H NMR (600 MHz, CDCl<sub>3</sub>): δ 3.75 (s, 3H), 2.49 (dd, *J* = 17.4, 3.6 Hz, 1H), 2.24 (dd, *J* = 17.4, 9.0 Hz, 1H), 1.92-1.98 (m, 2H), 1.75-1.81 (m, 2H), 1.57-1.71 (m, 2H), 1.35-1.43 (m, 1H), 0.84 (s, 9H), 0.16 (s, 9H), 0.09 (s, 3H), 0.06 (s, 3H); <sup>13</sup>C NMR (150 MHz, CDCl<sub>3</sub>): δ 154.3, 106.1, 90.3, 72.6, 52.5, 48.3, 40.2, 28.0, 25.8 (3 × C), 19.7, 18.1, 17.9, 1.7 (3 × C), -2.7, -3.2; IR (neat): 2954, 2238, 1717, 1247, 831, 777 cm<sup>-1</sup>; HRMS (ESI) calc. for C<sub>19</sub>H<sub>36</sub>O<sub>4</sub>Si<sub>2</sub>Na (M+Na)<sup>+</sup> 407.2044 found 407.2044.

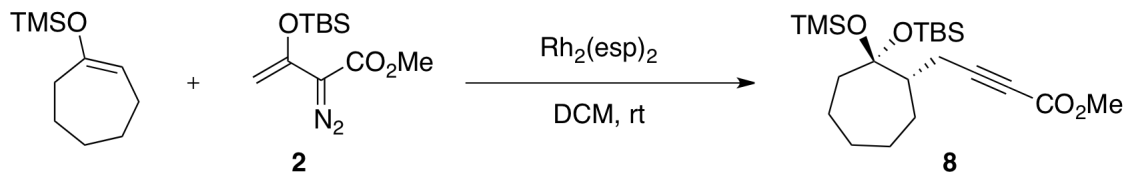

**Methyl 4-((1SR,2SR)-2-((tert-butyldimethylsilyloxy)-2-((trimethylsilyloxy)cycloheptyl)but-2-ynoate 8:** Derived from methyl 3-((tert-butyldimethylsilyloxy)-2-diazo)but-3-enoate **2** (256 mg, 1.0 mmol, 2.0 equiv) and

(cyclohept-1-en-1-yloxy)trimethylsilane (92 mg, 0.5 mmol, 1.0 equiv) and purified through column chromatography (30/1 pentane/Et<sub>2</sub>O) on silica gel to provide **8** as a colorless oil (0.126 g, 61% yield). <sup>1</sup>H NMR (400 MHz, CDCl<sub>3</sub>): δ 3.73 (s, 3H), 2.64 (dd, *J* = 17.6, 2.8 Hz, 1H), 2.12 (dd, *J* = 17.6, 11.2 Hz, 1H), 1.66-1.86 (m, 5H), 1.30-1.63 (m, 6H), 0.84 (s, 9H), 0.14 (s, 9H), 0.06 (s, 3H), 0.02 (s, 3H); <sup>13</sup>C NMR (100 MHz, CDCl<sub>3</sub>): δ 154.6, 102.4, 91.3, 73.2, 52.7, 52.3, 42.8, 27.7, 26.5, 26.2 (3 × C), 25.9, 20.7, 20.4, 18.4, 2.28 (3 × C), -2.2, -2.8; IR (neat): 2953, 2929, 2237, 1717, 1251, 1046, 835; HRMS (ESI) calc. for C<sub>21</sub>H<sub>40</sub>O<sub>4</sub>Si<sub>2</sub>Na (M+Na)<sup>+</sup> 435.2357 found 435.2361.

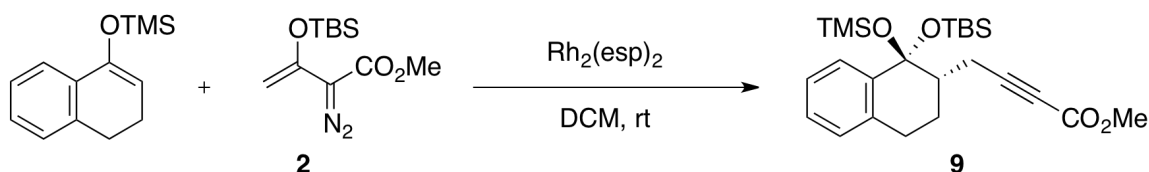

**Methyl 4-((1*RS*,2*SR*)-1-((*tert*-butyldimethylsilyl)oxy)-1-((trimethylsilyl)oxy)-1,2,3,4-tetrahydronaphthalen-2-yl)but-2-ynoate **9**:** Derived from methyl 3-((*tert*-butyldimethylsilyl)oxy)-2-diazobut-3-enoate **2** (256 mg, 1.0 mmol, 2.0 equiv) and ((3,4-dihydronaphthalen-1-yl)oxy)trimethylsilane (109 mg, 0.5 mmol, 1.0 equiv), and purified through column chromatography (30/1 pentane/Et<sub>2</sub>O, R<sub>f</sub>: 0.38) on silica gel to provide **9** as a colorless oil (0.154 g, 69% yield). <sup>1</sup>H NMR (600 MHz, CDCl<sub>3</sub>): δ 7.55-7.57 (m, 1H), 7.15-7.19 (m, 2H), 7.03-7.05 (m, 1H), 3.78 (s, 3H), 2.76-2.87 (m, 3H), 2.31 (dd, *J* = 17.4, 11.4 Hz, 1H), 2.14-2.18 (m, 1H), 2.05 (t, *J* = 10.8 Hz, 1H), 1.81-1.88 (m, 1H), 0.78 (s, 9H), 0.17 (s, 3H), 0.09 (s, 3H), -0.05 (s, 9H); <sup>13</sup>C NMR (150 MHz, CDCl<sub>3</sub>): δ 154.2, 140.6, 135.7, 128.5, 127.7, 126.7, 125.6, 97.9, 89.7, 73.4, 52.6, 47.0, 28.3, 25.9 (3 × C),

24.8, 19.1, 18.1, 1.4 (3 × C), -2.1, -2.3; IR (neat): 2953, 2929, 2238, 1717, 1249, 1069, 861, 797 cm<sup>-1</sup>; HRMS (ESI) calc. for C<sub>24</sub>H<sub>38</sub>O<sub>4</sub>Si<sub>2</sub>Na (M+Na)<sup>+</sup> 469.2201 found 469.2199; M.p. 43-46 °C.

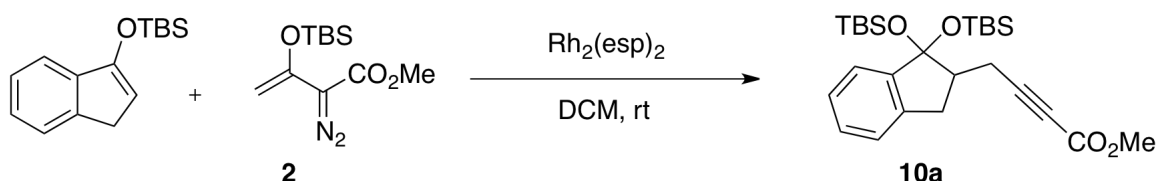

**(+/-)-Methyl 4-(1,1-bis((*tert*-butyldimethylsilyloxy)-2,3-dihydro-1*H*-inden-2-yl)but-2-ynoate **10a**:** Derived from methyl 3-((*tert*-butyldimethylsilyloxy)-2-diazo)but-3-enoate **2** (256 mg, 1.0 mmol, 2.0 equiv) and ((1*H*-inden-3-yl)oxy)(*tert*-butyl)dimethylsilane (123 mg, 0.5 mmol, 1.0 equiv) and purified through column chromatography (30/1 pentane/Et<sub>2</sub>O, R<sub>f</sub>: 0.42) on silica gel to provide **10a** as a colorless oil (79.4 mg, 33% yield). <sup>1</sup>H NMR (600 MHz, CDCl<sub>3</sub>): δ 7.34 (d, *J* = 7.2 Hz, 1H), 7.25-7.27 (m, 1H), 7.22 (t, *J* = 7.2 Hz, 1H), 7.18 (d, *J* = 7.2 Hz, 1H), 3.79 (s, 3H), 3.17 (dd, *J* = 15.0, 6.6 Hz, 1H), 2.72-2.76 (m, 1H), 2.67 (dd, *J* = 15.6, 8.4 Hz, 1H), 2.54-2.61 (m, 2H), 0.96 (s, 9H), 0.77 (s, 9H), 0.18 (s, 3H), -0.05 (s, 3H), -0.07 (s, 3H), -0.10 (s, 3H); <sup>13</sup>C NMR (100 MHz, CDCl<sub>3</sub>): δ 154.2, 145.7, 140.2, 128.6, 126.3, 125.0, 122.9, 105.7, 89.1, 73.2, 52.6, 51.4, 35.0, 25.9 (3 × C), 25.7 (3 × C), 18.5, 18.2, 18.1, -2.5, -3.1, -3.2, -3.3; IR (neat): 2952, 2929, 2856, 2239, 1718, 1472, 1462, 1435, 1247, 1190, 1157, 1141, 1059, 878 cm<sup>-1</sup>; HRMS (APCI) calc. for C<sub>26</sub>H<sub>43</sub>O<sub>4</sub>Si<sub>2</sub> (M+H)<sup>+</sup> 475.2694 found 475.2698.

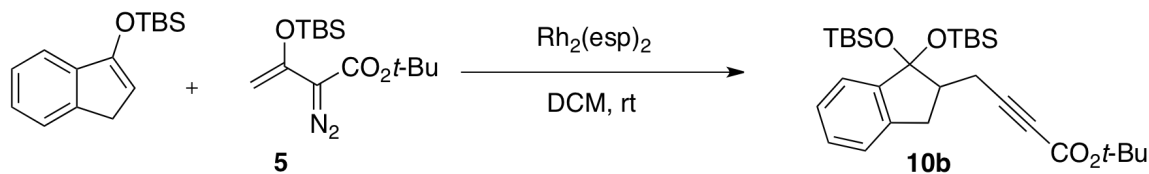

**(+/-)-tert-Butyl 4-(1,1-bis((tert-butyldimethylsilyl)oxy)-2,3-dihydro-1H-inden-2-yl)but-2-ynoate 10b:** Derived from *tert*-butyl 3-((*tert*-butyldimethylsilyl)oxy)-2-diazobut-3-enoate **5** (298 mg, 1.0 mmol, 2.0 equiv) and ((1*H*-inden-3-yl)oxy)(*tert*-butyl)dimethylsilane (123 mg, 0.5 mmol, 1.0 equiv), and purified through column chromatography (30/1 pentane/Et<sub>2</sub>O, R<sub>f</sub>: 0.46) on silica gel to provide **10b** as a colorless oil (0.219 g, 84% yield). <sup>1</sup>H NMR (400 MHz, CDCl<sub>3</sub>): δ 7.32 (d, *J* = 7.2 Hz, 1H), 7.15-7.26 (m, 3H), 3.25 (dd, *J* = 15.6, 6.4 Hz, 1H), 2.62-2.73 (m, 2H), 2.51-2.57 (m, 2H), 1.51 (s, 9H), 0.94 (s, 9H), 0.75 (s, 9H), 0.15 (s, 3H), -0.07 (s, 3H), -0.09 (s, 3H), -0.12 (s, 3H); <sup>13</sup>C NMR (150 MHz, CDCl<sub>3</sub>): δ 152.9, 145.8, 140.3, 128.6, 126.3, 125.0, 122.9, 105.8, 86.2, 83.0, 74.8, 51.4, 35.1, 28.0 (3 × C), 25.9 (3 × C), 25.8 (3 × C), 18.5, 18.2, 18.1, -2.4, -3.0, -3.1, -3.3; IR (neat): 2950, 2930, 2230, 1709, 1374, 1255, 1205, 1170, 1104, 988 cm<sup>-1</sup>; HRMS (APCI) calc. for C<sub>25</sub>H<sub>39</sub>O<sub>3</sub>Si<sub>2</sub> (M-OC(CH<sub>3</sub>)<sub>3</sub>)<sup>+</sup> 443.2438 found 443.2433.

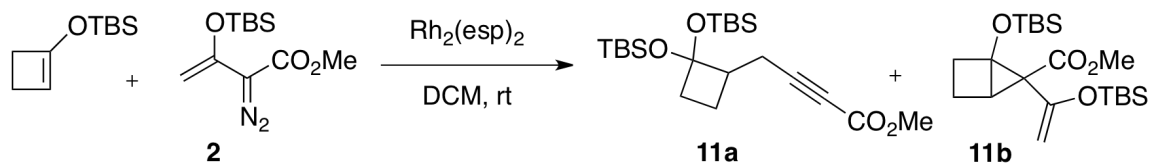

**(+/-)-Methyl 4-(2,2-bis((tert-butyldimethylsilyl)oxy)cyclobutyl)but-2-ynoate 11a:** Derived from methyl 3-((*tert*-butyldimethylsilyl)oxy)-2-diazobut-3-enoate **2** (256 mg, 1.0 mmol, 2.0 equiv) and *tert*-butyl(cyclobut-1-en-1-yl)oxy)dimethylsilane (92 mg, 0.5 mmol,



1.0 equiv), and purified through column chromatography (30/1 pentane/Et<sub>2</sub>O, R<sub>f</sub>: 0.42) on silica gel to provide **11a** as a colorless oil (105 mg, 51% yield). <sup>1</sup>H NMR (400 MHz, CDCl<sub>3</sub>): δ 3.74 (s, 3H), 2.60-2.68 (m, 1H), 2.41-2.54 (m, 2H), 2.14-2.21 (m, 2H), 1.84-1.92 (m, 1H), 1.31-1.40 (m, 1H), 0.89 (s, 9H), 0.88 (s, 9H), 0.16 (s, 3H), 0.15 (s, 3H), 0.13 (s, 3H), 0.11 (s, 3H); <sup>13</sup>C NMR (100 MHz, CDCl<sub>3</sub>): δ 154.3, 98.2, 89.0, 72.7, 52.5, 48.4, 38.3, 25.8 (6 × C), 18.7, 18.5, 18.0, 17.9, -2.8 (2 × C), -3.4 (2 × C); IR (neat): 2952, 2929, 2857, 2237, 1717, 1472, 1462, 1434, 1245, 1217, 1193, 1162, 1120, 1071, 1042, 992, 938 cm<sup>-1</sup>; HRMS (APCI) calc. for C<sub>21</sub>H<sub>41</sub>O<sub>4</sub>Si<sub>2</sub> (M+H)<sup>+</sup> 413.2538 found 413.2533.

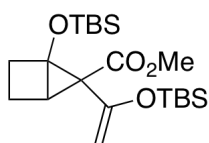

**11b**

**Methyl 1-((tert-butyldimethylsilyloxy)-5-(1-((tert-butyldimethylsilyloxy)vinyl)bicyclo[2.1.0]pentane-5-carboxylate 11b:** Derived from methyl 3-((tert-butyldimethylsilyloxy)-2-diazobut-3-enoate **2** (256 mg, 1.0 mmol, 2.0 equiv) and tert-butyl(cyclobut-1-en-1-yloxy)dimethylsilane (92 mg, 0.5 mmol, 1.0 equiv), and purified through column chromatography (30/1 pentane/Et<sub>2</sub>O, R<sub>f</sub>: 0.50) on silica gel to provide **11b** as colorless oil (94 mg, 46% yield). <sup>1</sup>H NMR (400 MHz, CDCl<sub>3</sub>): δ 4.44 (d, *J* = 0.8 Hz, 1H), 4.23 (d, *J* = 0.8 Hz, 1H), 3.65 (s, 3H), 2.79 (dd, *J* = 4.8, 1.6 Hz, 1H), 2.34 (td, *J* = 10.8, 3.6 Hz, 1H), 2.11-2.17 (m, 1H), 1.96-2.04 (m, 1H), 1.12-1.17 (m, 1H), 0.90 (s, 9H), 0.85 (s, 9H), 0.20 (s, 6H), 0.11 (s, 6H); <sup>13</sup>C NMR (100 MHz, CDCl<sub>3</sub>): δ 170.4, 150.0, 95.2, 68.7, 51.6, 45.1, 37.9, 31.5, 25.6 (3 × C), 25.5 (3 × C), 18.1, 17.7, 16.7, -4.1, -

4.2, -4.7, -5.0; IR (neat): 2949, 2929, 2857, 1720, 1638, 1472, 1462, 1434, 1359, 1277, 1248, 1221, 1170, 1119, 1083, 1059, 1024, 1005, 959, 939  $\text{cm}^{-1}$ ; HRMS (APCI) calc. for  $\text{C}_{21}\text{H}_{41}\text{O}_4\text{Si}_2$  ( $\text{M}+\text{H}$ )<sup>+</sup> 413.2538 found 413.2535.

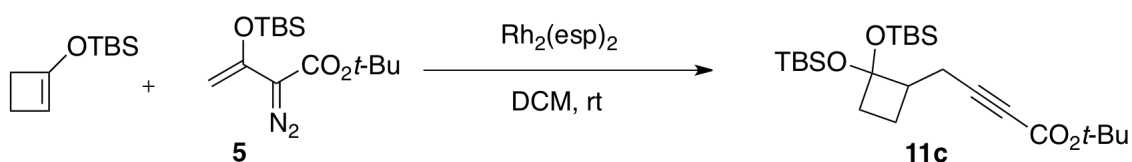

**(+/-)-*tert*-Butyl 4-(2,2-bis((*tert*-butyldimethylsilyl)oxy)cyclobutyl)but-2-ynoate (**11c**):**

Derived from *tert*-butyl 3-((*tert*-butyldimethylsilyl)oxy)-2-diazobut-3-enoate **5** (298 mg, 1.0 mmol, 2.0 equiv) and *tert*-butyl(cyclobut-1-en-1-yloxy)dimethylsilane (92 mg, 0.5 mmol, 1.0 equiv), and purified through column chromatography (30/1 pentane/ $\text{Et}_2\text{O}$ ,  $R_f$ : 0.42) on silica gel to provide **11c** as colorless oil (224 mg, 98% yield).  $^1\text{H}$  NMR (400 MHz,  $\text{CDCl}_3$ ):  $\delta$  2.60-2.68 (m, 1H), 2.38-2.52 (m, 2H), 2.16-2.21 (m, 2H), 1.84-1.92 (m, 1H), 1.48 (s, 9H), 1.31-1.41 (m, 1H), 0.90 (s, 9H), 0.89 (s, 9H), 0.17 (s, 3H), 0.16 (s, 3H), 0.13 (s, 3H), 0.12 (s, 3H);  $^{13}\text{C}$  NMR (100 MHz,  $\text{CDCl}_3$ ):  $\delta$  153.0, 98.3, 86.0, 82.7, 74.3, 48.4, 38.3, 28.0 (3  $\times$  C), 25.9 (3  $\times$  C), 25.8 (3  $\times$  C), 18.7, 18.5, 18.0, 17.9, -2.8 (2  $\times$  C), -3.4 (2  $\times$  C); IR (neat): 2953, 2930, 2896, 2857, 2237, 1708, 1472, 1463, 1391, 1368, 1250, 1218, 1161, 1120, 1069, 1042, 993, 938, 812  $\text{cm}^{-1}$ ; HRMS (APCI) calc. for  $\text{C}_{20}\text{H}_{37}\text{O}_3\text{Si}_2$  ( $\text{M}-\text{OC}(\text{CH}_3)_3$ )<sup>+</sup> 381.2281 found 381.2273.

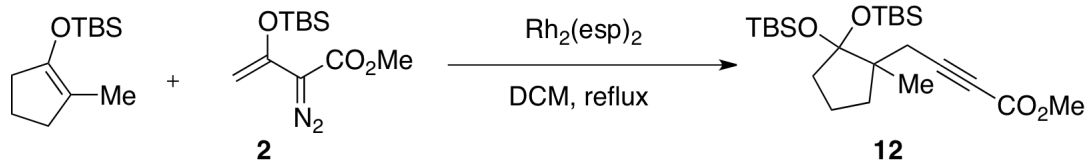

**(+/-)-Methyl 4-(2,2-bis((*tert*-butyldimethylsilyl)oxy)-1-methylcyclopentyl)but-2-ynoate 12:** Derived from methyl 3-((*tert*-butyldimethylsilyl)oxy)-2-diazobut-3-enoate **2** (154 mg, 0.6 mmol, 2.0 equiv) and *tert*-butyldimethyl((2-methylcyclopent-1-en-1-yl)oxy)silane (64 mg, 0.3 mmol, 1.0 equiv) under refluxed DCM, and purified through column chromatography (30/1 pentane/Et<sub>2</sub>O, R<sub>f</sub>: 0.42) on silica gel to provide **12** as a colorless oil (74 mg, 56% yield). <sup>1</sup>H NMR (400 MHz, CDCl<sub>3</sub>): δ 3.75 (s, 3H), 2.53 (d, *J* = 17.2 Hz, 1H), 2.29 (d, *J* = 17.2 Hz, 1H), 2.00-2.08 (m, 1H), 1.85-1.92 (m, 1H), 1.53-1.72 (m, 4H), 1.03 (s, 3H), 0.89 (s, 9H), 0.87 (s, 9H), 0.16 (s, 3H), 0.14 (s, 3H), 0.13 (s, 3H), 0.12 (s, 3H); <sup>13</sup>C NMR (100 MHz, CDCl<sub>3</sub>): δ 154.3, 108.1, 90.1, 73.7, 52.5, 49.6, 36.5, 33.8, 26.1 (3 × C), 26.0 (3 × C), 25.5, 21.4, 18.4 (2 × C), 17.9, -1.6, -1.7, -2.1, -2.4; IR (neat): 2953, 2930, 2857, 2235, 1717, 1472, 1463, 1434, 1248, 1159, 1117, 1074, 1046, 1000, 938, 889 cm<sup>-1</sup>; HRMS (APCI) calc. for C<sub>23</sub>H<sub>45</sub>O<sub>4</sub>Si<sub>2</sub> (M+H)<sup>+</sup> 441.2778 found 441.2805.

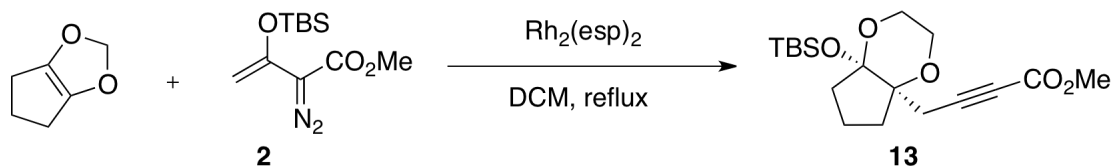

**Methyl 4-((4aRS,7aSR)-7a-((*tert*-butyldimethylsilyl)oxy)hexahydro-2H-cyclopenta[*b*][1,4]dioxin-4-yl)but-2-ynoate 13:** Derived from methyl 3-((*tert*-

butyldimethylsilyl)oxy)-2-diazobut-3-enoate **2** (256 mg, 1.0 mmol, 2.0 equiv) and 3,5,6,7-tetrahydro-2*H*-cyclopenta[*b*][1,4]dioxine (64 mg, 0.5 mmol, 1.0 equiv) under refluxed DCM, and purified through column chromatography (10/1 pentane/Et<sub>2</sub>O, R<sub>f</sub>: 0.26) on silica gel to provide **13** as a colorless oil (94 mg, 53% yield). <sup>1</sup>H NMR (400 MHz, CDCl<sub>3</sub>): δ 3.89-3.95 (m, 1H), 3.76-3.83 (m, 1H), 3.73 (s, 3H), 3.56 (dt, *J* = 11.6, 2.8 Hz, 1H), 3.49 (dt, *J* = 11.6, 2.8 Hz, 1H), 2.77 (dd, *J* = 17.6, 0.8 Hz, 1H), 2.47 (d, *J* = 17.6 Hz, 1H), 2.15-2.22 (m, 1H), 1.95-2.02 (m, 1H), 1.57-1.86 (m, 4H), 0.89 (s, 9H), 0.13 (s, 3H), 0.10 (s, 3H); <sup>13</sup>C NMR (100 MHz, CDCl<sub>3</sub>): δ 154.0, 102.2, 87.0, 81.9, 74.0, 59.8, 59.4, 52.5, 35.7, 28.1, 26.4, 25.7 (3 × C), 18.1, 17.4, -3.2, -3.3; IR (neat): 2954, 2857, 2239, 1715, 1250, 1108, 1076, 1030, 837 cm<sup>-1</sup>; HRMS (ESI) calc. for C<sub>18</sub>H<sub>30</sub>O<sub>5</sub>SiNa (M+Na)<sup>+</sup> 377.1755 found 377.1756.

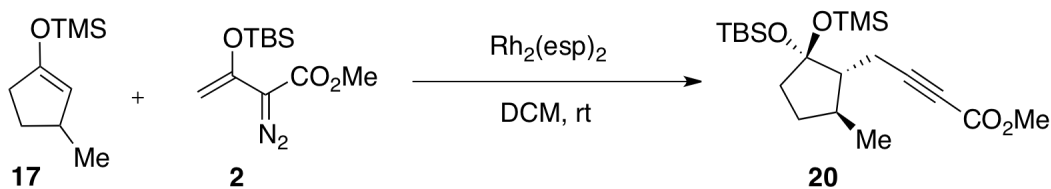

**Methyl 4-((1*R*,2*SR*,5*SR*)-2-((*tert*-butyldimethylsilyl)oxy)-5-methyl-2-((trimethylsilyl)oxy)cyclopentyl)but-2-ynoate **20**:** Derived from methyl 3-((*tert*-butyldimethylsilyl)oxy)-2-diazobut-3-enoate **2** (256 mg, 1.0 mmol, 2.0 equiv) and trimethyl((3-methylcyclopent-1-en-1-yl)oxy)silane<sup>10</sup> **17** (85 mg, 0.5 mmol, 1.0 equiv), and purified through column chromatography (40/1 pentane/Et<sub>2</sub>O) on neutral alumina to provide **20** as a colorless oil (114 mg, 57% yield). <sup>1</sup>H NMR (600 MHz, C<sub>6</sub>D<sub>6</sub>): δ 3.24 (s, 3H), 2.47 (dd, *J* = 18.0, 6.0 Hz, 1H), 2.14 (dd, *J* = 18.0, 7.2 Hz, 1H), 1.56-1.76 (m, 4H),

1.45-1.49 (m, 1H), 1.00 (d,  $J = 6.6$  Hz, 3H), 0.95-0.98 (m, 1H), 0.90 (s, 9H), 0.15 (s, 3H), 0.11 (s, 3H), 0.08 (s, 9H);  $^{13}\text{C}$  NMR (100 MHz,  $\text{C}_6\text{D}_6$ ):  $\delta$  154.0, 106.9, 89.4, 74.0, 56.0, 51.6, 39.6, 36.8, 29.6, 26.0 ( $3 \times \text{C}$ ), 21.0, 18.0, 17.2, 1.5 ( $3 \times \text{C}$ ), -2.5, -3.1; IR (neat): 2953, 2856, 2238, 1716, 1248, 1166, 1043, 832  $\text{cm}^{-1}$ ; HRMS (ESI) calc. for  $\text{C}_{20}\text{H}_{38}\text{O}_4\text{Si}_2\text{Na}$  ( $\text{M}+\text{Na}$ ) $^+$  421.2201 found 421.2208.

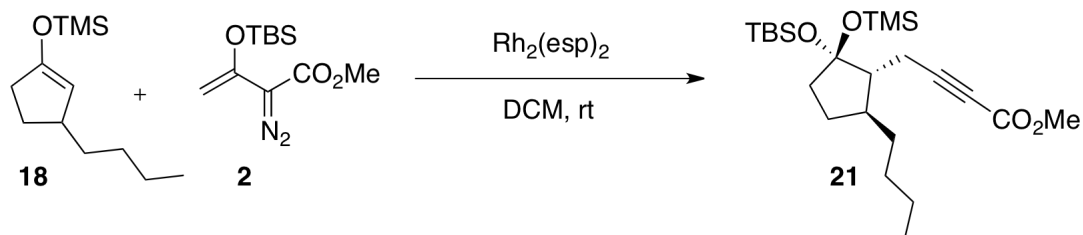

**Methyl 4-((1*RS*,2*SR*,5*SR*)-5-butyl-2-((*tert*-butyldimethylsilyloxy)-2-((trimethylsilyloxy)cyclopentyl)but-2-ynoate **21**:** Derived from methyl 3-((*tert*-butyldimethylsilyloxy)-2-diazobut-3-enoate **2** (256 mg, 1.0 mmol, 2.0 equiv) and ((3-butylcyclopent-1-en-1-yl)oxy)trimethylsilane<sup>11</sup> **18** (106 mg, 0.5 mmol, 1.0 equiv), and purified through column chromatography (40/1 pentane/ $\text{Et}_2\text{O}$ ) on neutral alumina to provide **21** as a colorless oil (111 mg, 50% yield).  $^1\text{H}$  NMR (400 MHz,  $\text{C}_6\text{D}_6$ ):  $\delta$  3.22 (s, 3H), 2.49 (dd,  $J = 17.2, 5.2$  Hz, 1H), 2.17 (dd,  $J = 17.2, 6.0$  Hz, 1H), 1.69-1.79 (m, 1H), 1.56-1.63 (m, 4H), 1.20-1.32 (m, 4H), 1.06-1.14 (m, 3H), 0.90 (s, 9H), 0.85-0.88 (m, 3H), 0.16 (s, 3H), 0.11 (s, 3H), 0.09 (s, 9H);  $^{13}\text{C}$  NMR (100 MHz,  $\text{C}_6\text{D}_6$ ):  $\delta$  154.0, 106.8, 89.5, 74.0, 54.1, 51.6, 42.0, 39.6, 35.6 30.0, 27.0, 26.0 ( $3 \times \text{C}$ ), 23.2, 18.0, 17.5, 14.2, 1.5 ( $3 \times \text{C}$ ), -2.5, -3.1; IR (neat): 2953, 2856, 2238, 1717, 1249, 1164, 1054, 832  $\text{cm}^{-1}$ ; HRMS (ESI) calc. for  $\text{C}_{23}\text{H}_{44}\text{O}_4\text{Si}_2\text{Na}$  ( $\text{M}+\text{Na}$ ) $^+$  463.2670 found 463.2680.

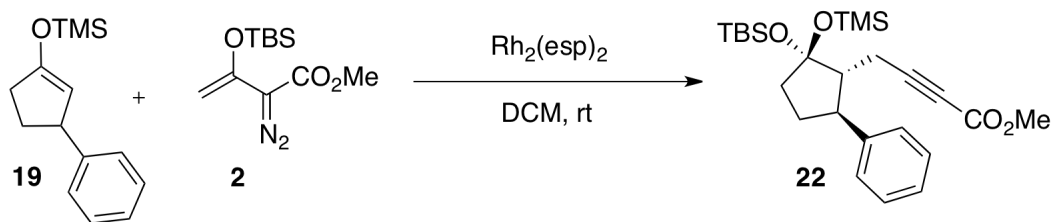

**Methyl 4-((1*RS*,2*SR*,5*SR*)-2-((*tert*-butyldimethylsilyl)oxy)-5-phenyl-2-((trimethylsilyl)oxy)cyclopentyl)but-2-ynoate **22**:** Derived from methyl 3-((*tert*-butyldimethylsilyl)oxy)-2-diazobut-3-enoate **2** (256 mg, 1.0 mmol, 2.0 equiv) and trimethyl((3-phenylcyclopent-1-en-1-yl)oxy)silane<sup>11</sup> **19** (116 mg, 0.5 mmol, 1.0 equiv), and purified through column chromatography (40/1 pentane/Et<sub>2</sub>O) on neutral alumina to provide **22** as a colorless oil (134 mg, 58% yield). <sup>1</sup>H NMR (400 MHz, C<sub>6</sub>D<sub>6</sub>): δ 7.01-7.15 (m, 5H), 3.17 (s, 3H), 2.69-2.76 (m, 1H), 3.39-2.46 (m, 1H), 2.08-2.18 (m, 2H), 1.96-2.04 (m, 1H), 1.83-1.91 (m, 1H), 1.68-1.75 (m, 1H), 1.50-1.59 (m, 1H), 0.96 (s, 9H), 0.25 (s, 3H), 0.15 (s, 12H); <sup>13</sup>C NMR (100 MHz, C<sub>6</sub>D<sub>6</sub>): δ 153.9, 145.0, 128.8 (2 × C), 127.6 (2 × C, signal overlaps with C<sub>6</sub>D<sub>6</sub> solvent signal), 126.6, 106.4, 88.7, 74.0, 56.2, 51.5, 48.3, 40.5, 30.3, 26.1 (3 × C), 25.8, 18.1, 16.4, 1.6 (3 × C), -2.5, -3.0; IR (neat): 2953, 2856, 2238, 1716, 1251, 1081, 835 cm<sup>-1</sup>; HRMS (ESI) calc. for C<sub>25</sub>H<sub>40</sub>O<sub>4</sub>Si<sub>2</sub>Na (M+Na)<sup>+</sup> 483.2357 found 483.2357.

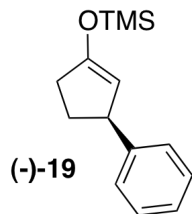

**(-)-(S)-trimethyl((3-phenylcyclopent-1-en-1-yl)oxy)silane**<sup>12</sup> **19** : Silyl enol ether **(-)-19** was prepared in accordance with the reported procedure by Hayashi and co-workers<sup>12</sup> and all spectroscopic data of the purified product was consistent with the reported values.  $[\alpha]_D^{20}$   $-31.6^\circ$  ( $c$  1.00,  $\text{CHCl}_3$ ). The enantiomeric excess was determined by HPLC analysis of the corresponding ketone, which was prepared by protonolysis of **(-)-19**.  $[\alpha]_D^{20}$   $-82.8^\circ$  ( $c$  0.92,  $\text{CHCl}_3$ ); HPLC analysis: 98% ee, CHIRALCEL ADH, 0.5% isopropanol/hexanes, 1 mL/min, UV: 254 nm,  $t_R$ : 19.99 min (minor), 20.82 min (major).

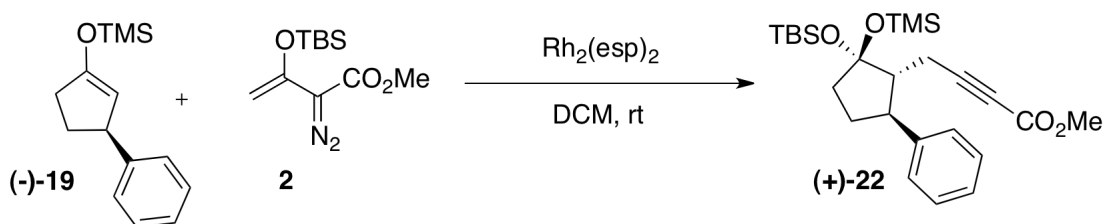

**(+)-Methyl 4-((1R,2S,5S)-2-((tert-butyldimethylsilyl)oxy)-5-phenyl-2-((trimethylsilyl)oxy)cyclopentyl)but-2-ynoate** **22**: Derived from methyl 3-((tert-butyldimethylsilyl)oxy)-2-diazobut-3-enoate **2** (247 mg, 0.96 mmol, 2.0 equiv) and **(-)-(S)-trimethyl((3-phenylcyclopent-1-en-1-yl)oxy)silane** **(-)-19** (112 mg, 0.048 mmol, 1.0 equiv), and purified through column chromatography (40/1 pentane/ $\text{Et}_2\text{O}$ ) on neutral alumina to provide **(+)-22** as a colorless oil (115 mg, 52% yield).  $[\alpha]_D^{20}$   $3.6^\circ$  ( $c$  1.33,

CHCl<sub>3</sub>); all data as previously stated. Product was determined to be 98% ee after derivatization (see **22a**).

### **Optimization of Conditions for the Asymmetric Alkynoate Synthesis**

This study began with the evaluation of the best catalyst that could be used to access enantioenriched alkynoates. For this exercise, 1-(trimethylsiloxy)-cyclohexene **1** and methyl 3-((*tert*-butyldimethylsilyl)oxy)-2-diazobut-3-enoate **2** were selected as the substrates of choice. A series of dirhodium catalysts were tested and the results are summarized in Table 1. Although the desired alkynoate product was systematically isolated as a single diastereomer, the observed enantioselectivity was low (Table 1, entries 1-10). The best enantiomeric excess was obtained using Rh<sub>2</sub>(*S*-PTAD)<sub>4</sub> (entry 1) and this catalyst was therefore selected to carry out further optimization studies.

**General procedure for Table 1:** A solution of methyl 3-((*tert*-butyldimethylsilyl)oxy)-2-diazobut-3-enoate **2** (1.0 mmol, 2.0 equiv) in 6 mL of dried degassed DCM was added by syringe pump over 3 h at room temperature to a flame-dried 25 mL flask containing 1-(trimethylsiloxy)-cyclohexene **1** (0.5 mmol, 1.0 equiv) and catalyst (0.02 equiv) in 6 mL of dried degassed DCM under an argon atmosphere. The solution was stirred at room temperature for an additional 1 h. The mixture was concentrated under reduced pressure and purified by flash chromatography (30/1 pentane/Et<sub>2</sub>O) on silica gel to yield the product.



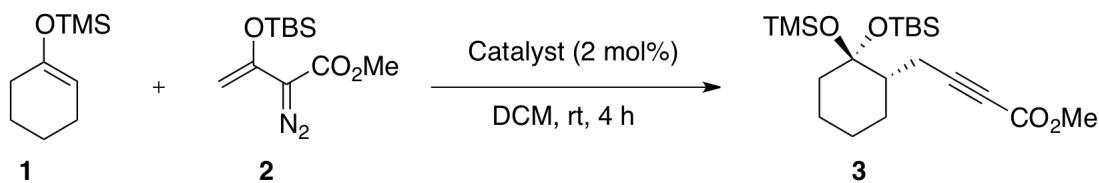

| Entry <sup>a</sup> | Catalyst         | Yield <sup>b</sup> | d.r. <sup>c</sup> | ee <sup>d</sup> |
|--------------------|------------------|--------------------|-------------------|-----------------|
| 1                  | <i>S</i> -PTAD   | 50                 | >20.1             | 37              |
| 2                  | <i>S</i> -NTTL   | 49                 | >20.1             | -6 <sup>e</sup> |
| 3                  | <i>S</i> -PTTL   | 62                 | >20.1             | 29              |
| 4                  | <i>R</i> -BNP    | 4                  | NA                | NA              |
| 5                  | <i>S</i> -BTPCP  | 27                 | >20.1             | 24              |
| 6                  | <i>S</i> -PTA    | 38                 | >20.1             | 31              |
| 7                  | <i>S</i> -TBPTTL | 37                 | >20.1             | 24              |
| 8                  | <i>R</i> -TCPTV  | 17                 | >20.1             | 17              |

<sup>a</sup> Reaction condition: diazo compound **2** (1 mmol) in DCM (6 mL) was added over 3 h via a syringe pump at rt to a mixture of (cyclohex-1-en-1-yloxy)trimethylsilane **1** (0.5 mmol) and catalyst (2.0 mol%) in DCM (6 mL), and stirred for another hour at rt. <sup>b</sup> Isolated yield after chromatography on silica gel. <sup>c</sup> Determined from <sup>1</sup>H NMR of the crude reaction mixture. <sup>d</sup> Determined by chiral HPLC after hydrolysis of the disiloxyketal. <sup>e</sup> Negative value indicates opposite asymmetric induction.

**Table 1**

A solvent screen was next performed. It was found that the enantioselectivity could be slightly improved using a different polar solvent such as TFT or DCE (Table 2, entries 2 and 3). However the use of non polar solvents had a negative impact on the reaction outcome and resulted in a significant erosion of enantioselectivity for the desired product (entries 4-6).

**General procedure for Table 2:** A solution of methyl 3-((*tert*-butyldimethylsilyl)oxy)-2-diazobut-3-enoate **2** (1.0 mmol, 2.0 equiv) in solution (6 mL) was added by syringe pump over 3 h at room temperature to a flame-dried 25 mL flask containing 1-(trimethylsilyloxy)-cyclohexene **1** (0.5 mmol, 1.0 equiv) and catalyst (0.02 equiv) in

solution (6 mL). The solution was stirred at room temperature for an additional 1 h. The mixture was concentrated under reduced pressure and purified by flash chromatography (30/1 pentane/Et<sub>2</sub>O) on silica gel to yield the product.

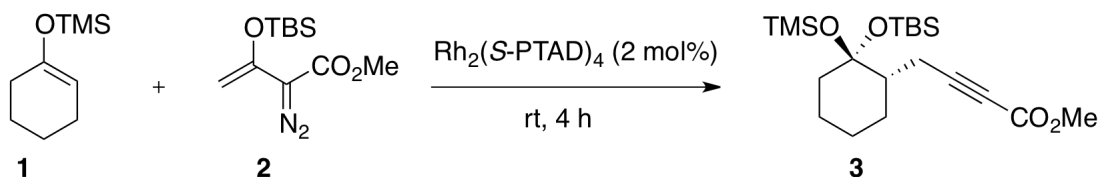

| Entry <sup>a</sup> | Solvent | Yield <sup>b</sup> | d.r. <sup>c</sup> | ee <sup>d</sup> |
|--------------------|---------|--------------------|-------------------|-----------------|
| 1                  | DCM     | 50                 | >20.1             | 37              |
| 2                  | TFT     | 57                 | >20.1             | 43              |
| 3                  | DCE     | 57                 | >20.1             | 39              |
| 4                  | 2,2-DMB | 56                 | >20.1             | 0               |
| 5                  | Pentane | 50                 | >20.1             | 5               |
| 6                  | Toluene | 46                 | >20.1             | 6               |

<sup>a</sup> Reaction condition: diazo compound **2** (1 mmol) in solution (6 mL) was added over 3 h via a syringe pump at rt to a mixture of (cyclohex-1-en-1-yloxy)trimethylsilane **1** (0.5 mmol) and  $\text{Rh}_2(\text{S-PTAD})_4$  (2.0 mol%) in solution (6 mL), and stirred for another hour at rt. <sup>b</sup> Isolated yield after chromatography on silica gel <sup>c</sup> Determined from <sup>1</sup>H NMR of the crude reaction mixture. <sup>d</sup> Determined by chiral HPLC after hydrolysis of the disiloxyketal.

**Table 2**

Finally, the reaction temperature was investigated (Table 3). Using TFT the enantioselectivity was improved to 60% ee when the reaction was conducted at -25 °C (Table 3, entry 3). Remarkably the reaction conversion was only slightly affected by the temperature.

**General procedure for Table 3:** A solution of methyl 3-((*tert*-butyldimethylsilyl)oxy)-2-diazobut-3-enoate **2** (1.0 mmol, 2.0 equiv) in solution (6 mL) was added by syringe pump over 3 h to a flame-dried 25 mL flask containing 1-(trimethylsilyloxy)-cyclohexene

(**1**) (0.5 mmol, 1.0 equiv) and catalyst (0.02 equiv) in solution (6 mL) at the indicated temperature. The solution was stirred at the indicated temperature for an additional 1 h. The mixture was concentrated under reduced pressure and purified by flash chromatography (30/1 pentane/Et<sub>2</sub>O) on silica gel to yield the product.

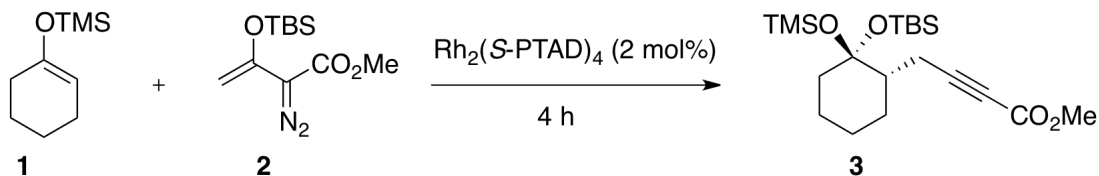

| Entry <sup>a</sup> | Temperature (°C) | Solvent | Yield <sup>b</sup> | d.r. <sup>c</sup> | ee <sup>d</sup> |
|--------------------|------------------|---------|--------------------|-------------------|-----------------|
| 1                  | rt               | TFT     | 57                 | >20.1             | 43              |
| 2                  | 0                | TFT     | 57                 | >20.1             | 49              |
| 3                  | -25              | TFT     | 53                 | >20.1             | 60              |
| 4                  | rt               | DCM     | 50                 | >20.1             | 37              |
| 5                  | -40              | DCM     | 50                 | >20.1             | 43              |

<sup>a</sup> Reaction condition: diazo compound **2** (1 mmol) in solution (6 mL) was added over 3 h via a syringe pump at the indicated temperature to a mixture of (cyclohex-1-en-1-yloxy)trimethylsilane **1** (0.5 mmol) and  $\text{Rh}_2(\text{S-PTAD})_4$  (2.0 mol%) in solution (6 mL), and stirred for another hour at the indicated temperature. <sup>b</sup> Isolated yield after chromatography on silica gel <sup>c</sup> Determined from <sup>1</sup>H NMR of the crude reaction mixture. <sup>d</sup> Determined by chiral HPLC after hydrolysis of the disiloxyketal.

**Table 3**

### General Procedure for the Asymmetric Alkynoate Synthesis

A solution of siloxyvinyl diazoacetate (1.0 mmol, 2.0 equiv) in 6 mL of dried degassed TFT was added by syringe pump over 3 h at -25 °C to a flame-dried 25 mL flask containing  $\text{Rh}_2(\text{S-PTAD})_4$  (15.6 mg, 0.02 equiv) and enol ethers (0.5 mmol, 1.0 equiv) in 6 mL of dried degassed TFT under an argon atmosphere. The solution was stirred at -25 °C for an additional 1 h. The mixture was concentrated under reduced pressure and purified by flash chromatography (pentane/Et<sub>2</sub>O) on silica gel to yield the product.

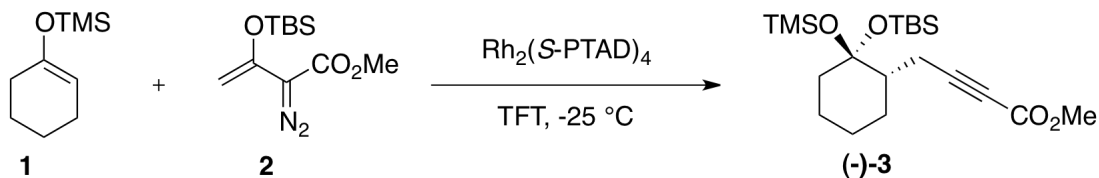

**(-)-Methyl 4-(-2-((*tert*-butyldimethylsilyl)oxy)-2-((trimethylsilyl)oxy)cyclohexyl)but-2-ynoate 3:** Derived from methyl 3-((*tert*-butyldimethylsilyl)oxy)-2-diazobut-3-enoate **2** (256 mg, 1.0 mmol, 2.0 equiv) and (cyclohex-1-en-1-yl)oxy)trimethylsilane **1** (85 mg, 0.5 mmol, 1.0 equiv), and purified through column chromatography (30/1 pentane/Et<sub>2</sub>O) on silica gel to provide **(-)-3** as a colorless oil which crystallized on standing (106 mg, 53% yield). [ $\alpha$ ]<sub>D</sub><sup>20</sup> -7.1° (*c* 1.18, CHCl<sub>3</sub>); all data as previously stated. Product was determined to be 60% ee after derivatization (see **(+)-16**).

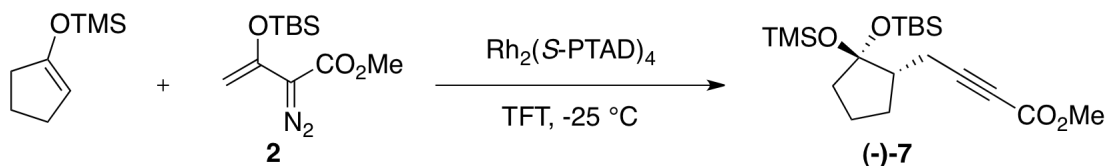

**(-)-Methyl 4-(-2-((*tert*-butyldimethylsilyl)oxy)-2-((trimethylsilyl)oxy)cyclopentyl)but-2-ynoate 7:** Derived from methyl 3-((*tert*-butyldimethylsilyl)oxy)-2-diazobut-3-enoate **2** (256 mg, 1.0 mmol, 2.0 equiv) and (cyclopent-1-en-1-yl)oxy)trimethylsilane (78 mg, 0.5 mmol, 1.0 equiv), and purified through column chromatography (30/1 pentane/Et<sub>2</sub>O) on silica gel to provide **(-)-7** as a

colorless oil (167 mg, 87% yield).  $[\alpha]_D^{20} -7.0^\circ$  ( $c$  1.56,  $\text{CHCl}_3$ ); all data as previously stated. Product was determined to be 50% ee after derivatization (see **7a**).

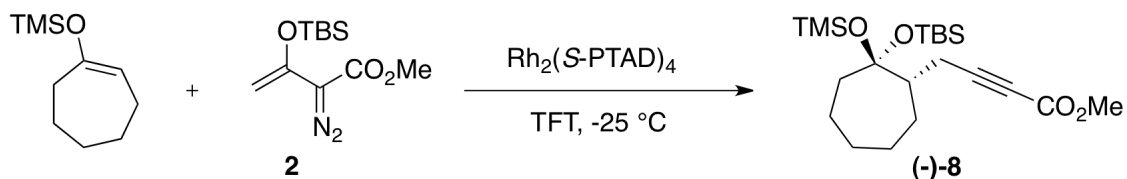

**(-)-Methyl 4-(2-((*tert*-butyldimethylsilyl)oxy)-2-((trimethylsilyl)oxy)cycloheptyl)but-2-ynoate **8**:** Derived from methyl 3-((*tert*-butyldimethylsilyl)oxy)-2-diazobut-3-enoate **2** (256 mg, 1.0 mmol, 2.0 equiv) and (cyclohept-1-en-1-yloxy)trimethylsilane (92 mg, 0.5 mmol, 1.0 equiv), and purified through column chromatography (30/1 pentane/ $\text{Et}_2\text{O}$ ) on silica gel to provide **(-)-8** as a colorless oil (0.142 g, 69% yield).  $[\alpha]_D^{20} -7.1^\circ$  ( $c$  1.48,  $\text{CHCl}_3$ ); all data as previously stated. Product was determined to be 70% ee after derivatization (see **8a**).

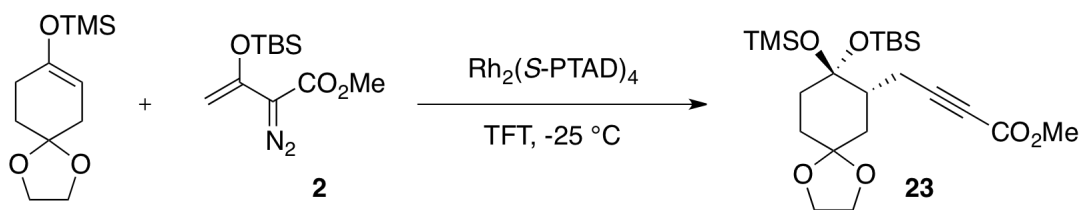

**(+)-Methyl 4-(8-((*tert*-butyldimethylsilyl)oxy)-8-((trimethylsilyl)oxy)-1,4-dioxaspiro[4.5]decan-7-yl)but-2-ynoate **23**:** Derived from methyl 3-((*tert*-butyldimethylsilyl)oxy)-2-diazobut-3-enoate **2** (256 mg, 1.0 mmol, 2.0 equiv) and (1,4-dioxaspiro[4.5]dec-7-en-8-yloxy)trimethylsilane<sup>13</sup> (114 mg, 0.5 mmol, 1.0 equiv), and

purified through column chromatography (80/20 pentane/Et<sub>2</sub>O) on silica gel to provide (+)-**23** as a colorless oil (111 mg, 49% yield). [ $\alpha$ ]<sup>20</sup><sub>D</sub> 1.9° (*c* 1.95, CHCl<sub>3</sub>); <sup>1</sup>H NMR (400 MHz, CDCl<sub>3</sub>):  $\delta$  3.90-3.98 (m, 4H), 3.74 (s, 3H), 2.67 (dd, *J* = 17.2, 3.2 Hz, 1H), 2.67 (dd, *J* = 17.2, 10.4 Hz, 1H), 1.75-1.99 (m, 5H), 1.65-1.75 (m, 1H), 1.52-1.58 (m, 1H), 0.84 (s, 9H), 0.16 (s, 9H), 0.08 (s, 3H), 0.04 (s, 3H); <sup>13</sup>C NMR (100 MHz, CDCl<sub>3</sub>):  $\delta$  154.5, 108.3, 98.7, 89.8, 73.7, 64.7, 64.5, 52.8, 44.6, 38.3, 37.6, 32.7, 26.2 (3 × C), 18.7, 18.3, 2.1 (3 × C), -2.3, -2.8; IR (neat): 2945, 2856, 2238, 1716, 1253, 1120, 1057, 835; HRMS (ESI) calc. for C<sub>22</sub>H<sub>40</sub>O<sub>6</sub>Si<sub>2</sub> (M+Na)<sup>+</sup> 479.2256 found 479.2262. Product was determined to be 46% ee after derivatization (see **23a**).

**General Procedure for the Deprotection of the Disiloxyketal Alkynoate Products:** To a solution of alkyne (1.0 equiv) in dry DMF (1.0 mL) at 0 °C was added a solution of tris(dimethylamino)sulfonium difluorotrimethylsilicate (TASF) (0.3 equiv) in dry DMF (0.5 mL). The reaction was stirred at 0 °C for 5 min. The mixture was then diluted with EtOAc (5 mL) and poured into a separating funnel containing a pH 7 phosphate buffer solution (5 mL). The layers were separated and the aqueous layer was extracted with ethyl acetate (2 × 5 mL). The organics were dried over MgSO<sub>4</sub>, concentrated under reduced pressure and purified by flash chromatography on silica gel (20% Et<sub>2</sub>O/pentane).

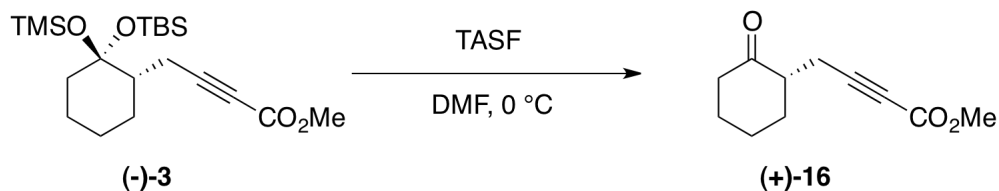

**(+)-Methyl 4-(2-oxocyclohexyl)but-2-ynoate 16<sup>14</sup>** : Derived from (-)-methyl 4-(2-((*tert*-butyldimethylsilyl)oxy)-2-((trimethylsilyl)oxy)cyclohexyl) but-2-ynoate **3** (83 mg, 0.21 mmol) and purified through column chromatography (80/20 pentane/Et<sub>2</sub>O) on silica gel to provide **16** as a colorless oil (38 mg, 94%).  $[\alpha]_D^{20}$  2.8° (*c* 1.50, CHCl<sub>3</sub>); <sup>1</sup>H NMR (400 MHz, CDCl<sub>3</sub>): δ 3.73 (s, 3H), 2.75 (dd, *J* = 17.6, 4.8 Hz, 1H), 2.51-2.59 (m, 1H), 2.35-2.45 (m, 2H), 2.25-2.34 (m, 2H), 2.06-2.12 (m, 1H), 1.88-1.94 (m, 1H), 1.58-1.71 (m, 2H), 1.39 (app. qd, *J* = 12.8, 3.6 Hz, 1H); <sup>13</sup>C NMR (100 MHz, CDCl<sub>3</sub>): δ 210.2, 154.3, 88.1, 74.1, 52.8, 49.0, 42.1, 33.6, 27.9, 25.3, 19.3; HPLC analysis: 60% ee, CHIRALCEL ODR, 1% isopropanol/hexanes, 1 mL/min, UV: 230 nm, *t*<sub>R</sub>: 16.26 min (minor), 17.60 min (major). NMR data was consistent with the literature.<sup>14</sup>

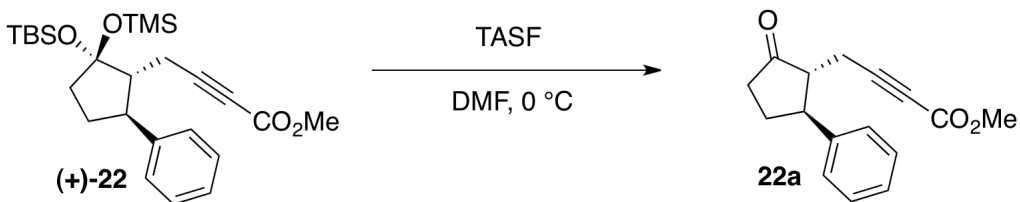

**(+)-Methyl 4-((1*R*,5*S*)-2-oxo-5-phenylcyclopentyl)but-2-ynoate 22a**: Derived from (+)-Methyl 4-((1*R*,2*S*,5*S*)-2-((*tert*-butyldimethylsilyl)oxy)-5-phenyl-2-((trimethylsilyl)oxy)cyclopentyl)but-2-ynoate **22** (40 mg, 0.09 mmol) and purified through column chromatography (80/20 pentane/Et<sub>2</sub>O) on silica gel to provide **22a** as a

colorless oil (20 mg, 91%).  $[\alpha]_{\text{D}}^{20}$  37.3° (*c* 0.44, CHCl<sub>3</sub>); <sup>1</sup>H NMR (400 MHz, CDCl<sub>3</sub>): δ 7.24-7.36 (m, 5H), 3.71 (s, 3H), 3.23 (td, *J* = 11.6, 6.0 Hz, 1H), 2.74 (dd, *J* = 18.8, 5.6 Hz, 1H), 2.54-2.60 (m, 1H), 2.34-2.43 (m, 3H), 2.25-2.34 (m, 1H), 1.97-2.07 (m, 1H); <sup>13</sup>C NMR (100 MHz, CDCl<sub>3</sub>): δ 216.0, 154.0, 141.4, 129.1 (2 × C), 127.5, 127.4 (2 × C), 86.0, 74.7, 54.4, 52.8, 47.2, 38.2, 29.3, 16.8; IR (neat): 2953, 2237, 1741, 1708, 1252, 721; HRMS (APCI) calc. for C<sub>16</sub>H<sub>15</sub>O<sub>3</sub> (M-H)<sup>+</sup> 255.1027 found 255.1027; HPLC analysis: 98% ee, CHIRALCEL ADH, 3% isopropanol/hexanes, 1 mL/min, UV: 230 nm, *t*<sub>R</sub>: 15.47 min (minor), 17.26 min (major).

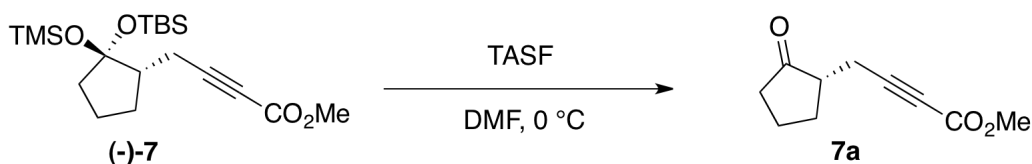

**(-)-Methyl 4-(2-oxocyclopentyl)but-2-ynoate 7a:** Derived from (-)-methyl 4-(2-((*tert*-butyldimethylsilyl)oxy)-2-((trimethylsilyl)oxy)cyclopentyl)but-2-ynoate **7** (30 mg, 0.08 mmol) and isolated as a colorless oil (14 mg, 97%).  $[\alpha]_{\text{D}}^{20}$  -77.7° (*c* 1.17, CHCl<sub>3</sub>); <sup>1</sup>H NMR (400 MHz, CDCl<sub>3</sub>): δ 3.73 (s, 3H), 2.72 (dd, 1H, *J* = 17.2, 4.0 Hz, 1H), 2.29-2.44 (m, 4H), 2.02-2.17 (m, 2H), 1.68-1.85 (m, 2H); <sup>13</sup>C NMR (100 MHz, CDCl<sub>3</sub>): δ 218.0, 154.2, 87.1, 74.0, 52.9, 47.4, 37.9, 29.1, 20.6, 19.0; IR (neat): 2957, 2237, 1742, 1712, 1256; HRMS (APCI) calc. for C<sub>10</sub>H<sub>13</sub>O<sub>3</sub> (M+H)<sup>+</sup> 181.0859 found 181.0858; HPLC analysis: 50% ee, CHIRALCEL OBH, 5% isopropanol/hexanes, 1 mL/min, UV: 230 nm, *t*<sub>R</sub>: 29.24 min (major), 31.88 min (minor).



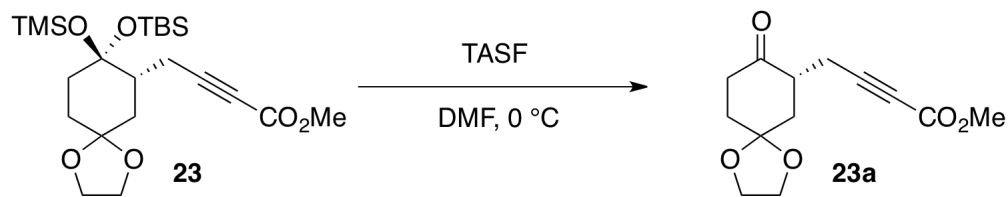

**(+)-Methyl 4-(8-oxo-1,4-dioxaspiro[4.5]decan-7-yl)but-2-ynoate 23a:** Derived from (+)-Methyl 4-(8-((*tert*-butyldimethylsilyl)oxy)-8-((trimethylsilyl)oxy)-1,4-dioxaspiro[4.5]decan-7-yl)but-2-ynoate **23** (18 mg, 0.04 mmol) and purified through column chromatography (60/40 pentane/Et<sub>2</sub>O) on silica gel to provide **23a** as a colorless oil (7 mg, 70%).  $[\alpha]_D^{20}$  1.5° (*c* 0.83, CHCl<sub>3</sub>); <sup>1</sup>H NMR (400 MHz, CDCl<sub>3</sub>): δ 3.99-4.07 (m, 4H), 3.72 (s, 3H), 2.85-2.94 (m, 1H), 2.71 (dd, *J* = 17.6, 4.8 Hz, 1H), 2.61-2.69 (m, 1H), 2.33-2.41 (m, 2H), 2.24-2.30 (ddd, *J* = 12.8, 5.6, 3.2 Hz, 1H), 1.95-2.06 (m, 2H), 1.79 (app. t, *J* = 13.6 Hz, 1H); <sup>13</sup>C NMR (100 MHz, CDCl<sub>3</sub>): δ 208.7, 154.2, 107.2, 87.2, 74.4, 65.1, 64.9, 52.9, 44.9, 40.0, 38.1, 34.8, 19.0; IR (neat): 2955, 2238, 1709, 1435, 1253, 1075; HRMS (ESI) calc. for C<sub>13</sub>H<sub>16</sub>O<sub>5</sub>Na (M+Na)<sup>+</sup> 275.0890 found 275.0890; HPLC analysis: 46% ee, CHIRALCEL ADH, 5% isopropanol/hexanes, 1 mL/min, UV: 230 nm, *t*<sub>R</sub>: 14.99 min (minor), 17.97 min (major).

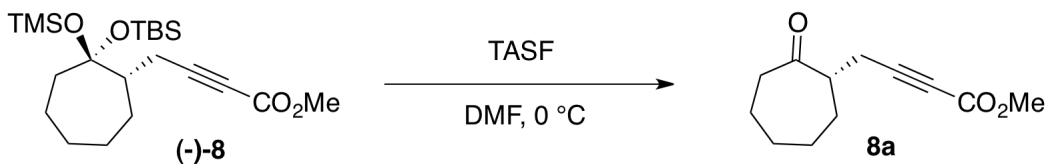

**(-)-Methyl 4-(2-oxocycloheptyl)but-2-ynoate 8a<sup>15</sup>** : Derived from (-)-4-(2-((*tert*-butyldimethylsilyl)oxy)-2-((trimethylsilyl)oxy)cycloheptyl)but-2-ynoate **8** (30 mg, 0.07

mmol) and purified through column chromatography (80/20 pentane/Et<sub>2</sub>O) on silica gel to provide **8a** as a colorless oil (13 mg, 89%).  $[\alpha]_D^{20}$  -41.3° (*c* 1.28, CHCl<sub>3</sub>); <sup>1</sup>H NMR (400 MHz, CDCl<sub>3</sub>): δ 3.73 (s, 3H), 2.80 (tt, *J* = 8.8, 3.6 Hz, 1H), 2.66 (dd, *J* = 17.2, 4.8 Hz, 1H), 2.53-3.00 (m, 1H), 2.34-2.47 (m, 2H), 1.95-2.00 (m, 1H), 1.77-1.90 (m, 3H), 1.60-1.70 (m, 1H), 1.41-1.57 (m, 2H), 1.26-1.38 (m, 1H); <sup>13</sup>C NMR (100 MHz, CDCl<sub>3</sub>): δ 213.2, 154.3, 88.2, 73.8, 52.9, 50.1, 43.5, 30.7, 29.5, 29.1, 23.9, 21.2; IR (neat): 2929, 2856, 2237, 1711, 1435, 1254, 1078; HRMS (APCI) calc. for C<sub>12</sub>H<sub>17</sub>O<sub>3</sub> (M+H)<sup>+</sup> 209.1172 found 209.1171; HPLC analysis: 70% ee, CHIRALCEL OBH, 3% isopropanol/hexanes, 1 mL/min, UV: 230 nm, *t*<sub>R</sub>: 20.61 min (major), 30.08 min (minor).

## References.

- 
- <sup>1</sup> Reddy, R. P.; Lee, G. H.; Davies, H. M. L. *Org. Lett.* **2006**, *8*, 3437.
- <sup>2</sup> Muller, P.; Allenbach, Y.; Robert, E. *Tetrahedron Asymmetry* **2003**, *14*, 779.
- <sup>3</sup> Tsutsui, H.; Abe, T.; Nakamura, S.; Anada, M.; Hashimoto, S. *Chem. Pharm. Bull.* **2005**, *53*, 1366.
- <sup>4</sup> Pirrung, M. C.; Zhang, J. *Tetrahedron Lett.* **1992**, *33*, 5987.
- <sup>5</sup> Qin, C.; Boyarskikh, V.; Hansen, J. H.; Hardcastle, K. I.; Musaev, D. G.; Davies, H. M. L. *J. Am. Chem. Soc.* **2011**, *133*, 19198.
- <sup>6</sup> Goto, T.; Takeda, K.; Shimada, N.; Nambu, H.; Anada, M.; Shiro, M.; Ando, K.; Hashimoto, S.-I. *Angew. Chem., Int. Ed.* **2011**, *50*, 6803.
- <sup>7</sup> Davies, H. M. L.; Ahmed, G.; Churchill, M. R. *J. Am. Chem. Soc.* **1996**, *118*, 10774.
- <sup>8</sup> Kundu, K.; Doyle, M. P. *Tetrahedron Asymmetry* **2006**, *17*, 574.
- <sup>9</sup> Xu, X.; Shabashov, D.; Zavalij, P. Y.; Doyle, M. P. *Org. Lett.* **2012**, *14*, 800.
- <sup>10</sup> Bergdahl, M.; Eriksson, M.; Nilsson, M.; Olsson, T. *J. Org. Chem.* **1993**, *58*, 7238.
- <sup>11</sup> Johnson, C. R.; Marren, T. J. *Tetrahedron Lett.* **1987**, *28*, 27.
- <sup>12</sup> Tokunaga, N.; Yoshida, K.; Hayashi, T. *Proc. Natl. Acad. Sci.* **2004**, *101*, 5445.
- <sup>13</sup> Sole, D.; Urbaneja, X.; Cordero-Vargas, A.; Bonjoch, J. *Tetrahedron* **2007**, *63*, 10177.
- <sup>14</sup> Vizniowski, C. S.; Green, J. R.; Breen, T. L.; Dalacu, A. V. *J. Org. Chem.* **1995**, *60*, 7496.
- <sup>15</sup> Mori, M.; Akashi, M.; Hori, M.; Hori, K.; Nishida, M.; Sato, Y. *Bull. Chem. Soc. Jpn.* **2004**, *77*, 1655.

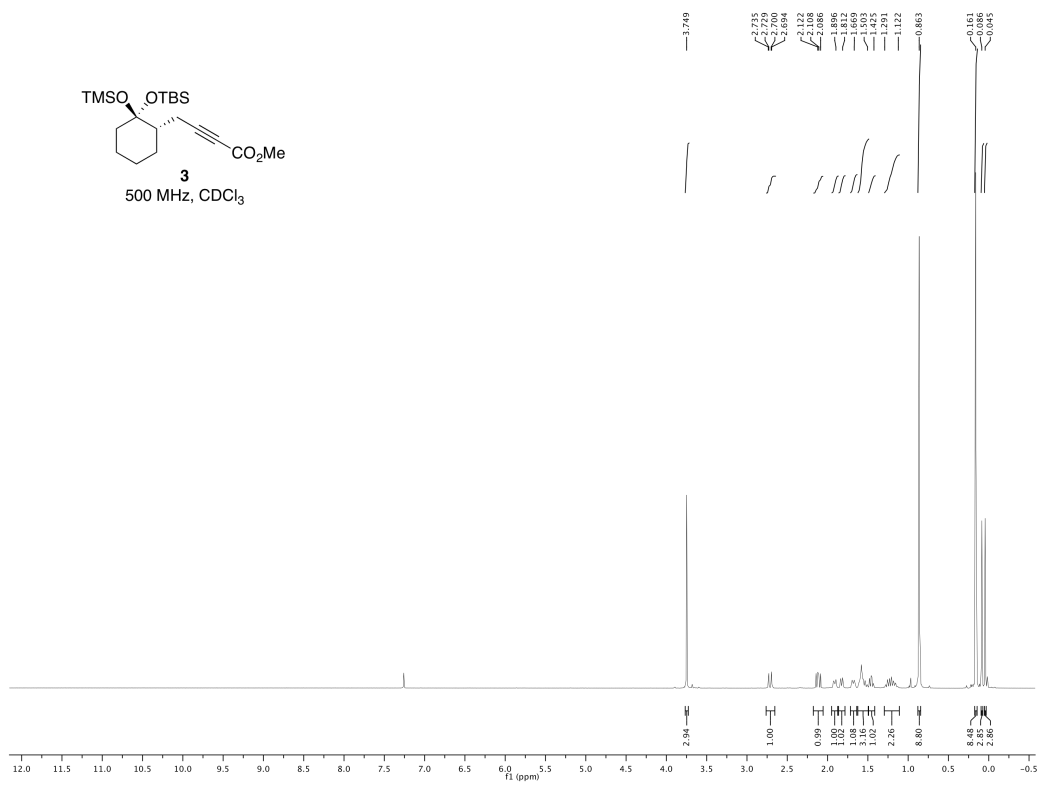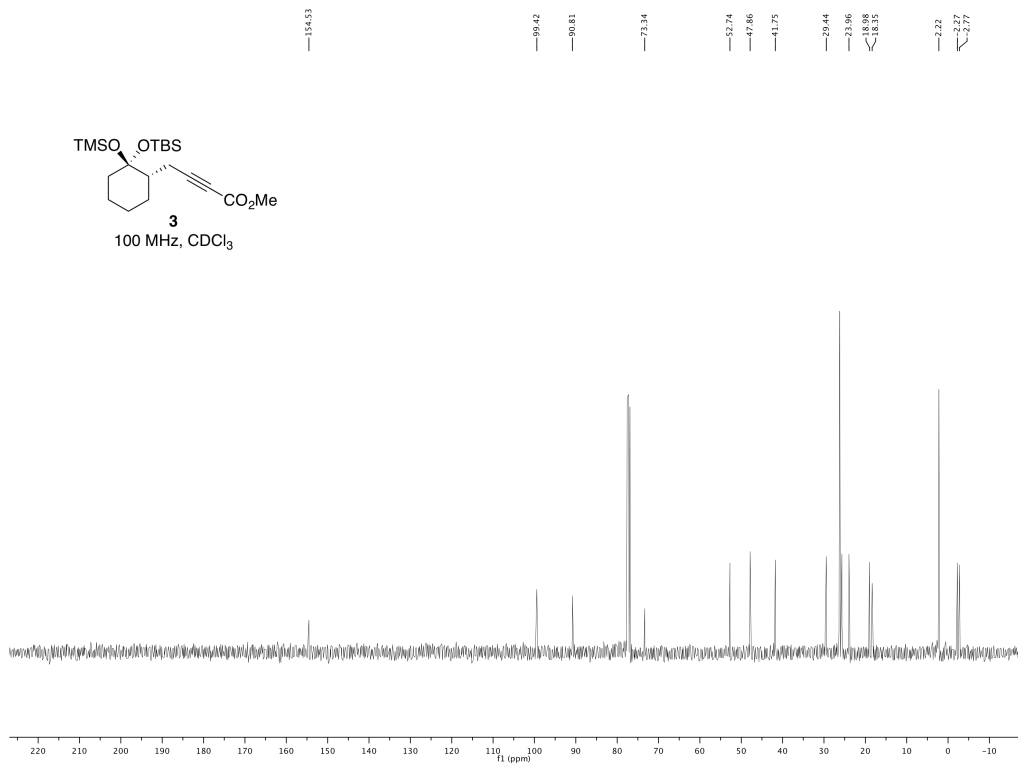

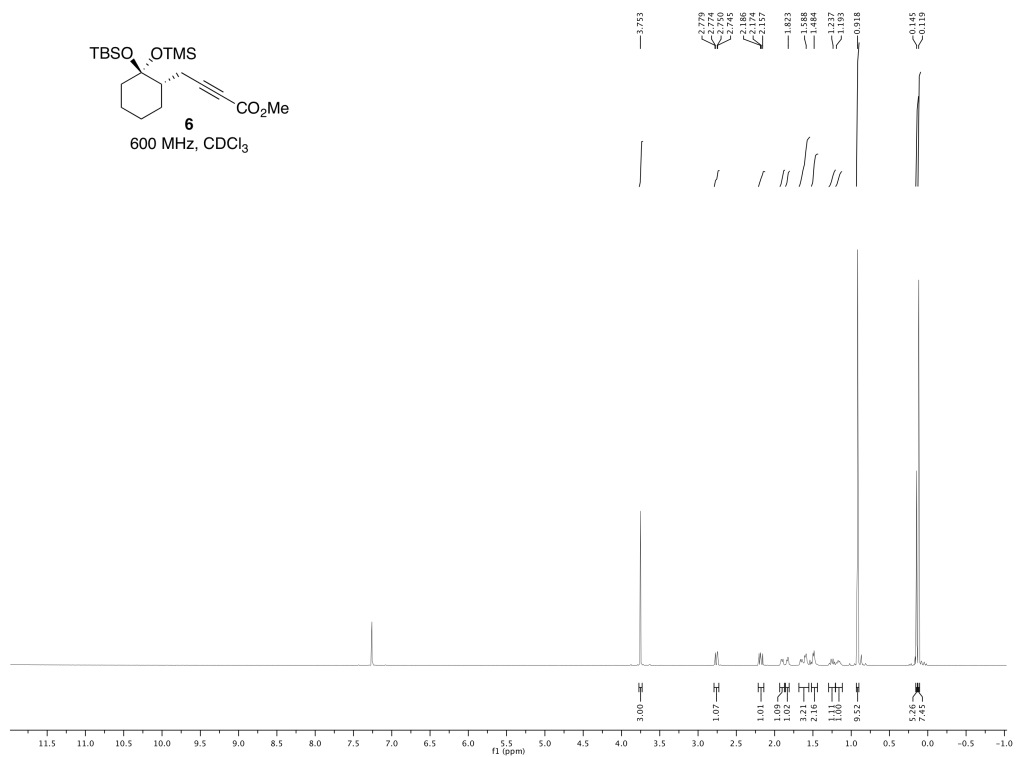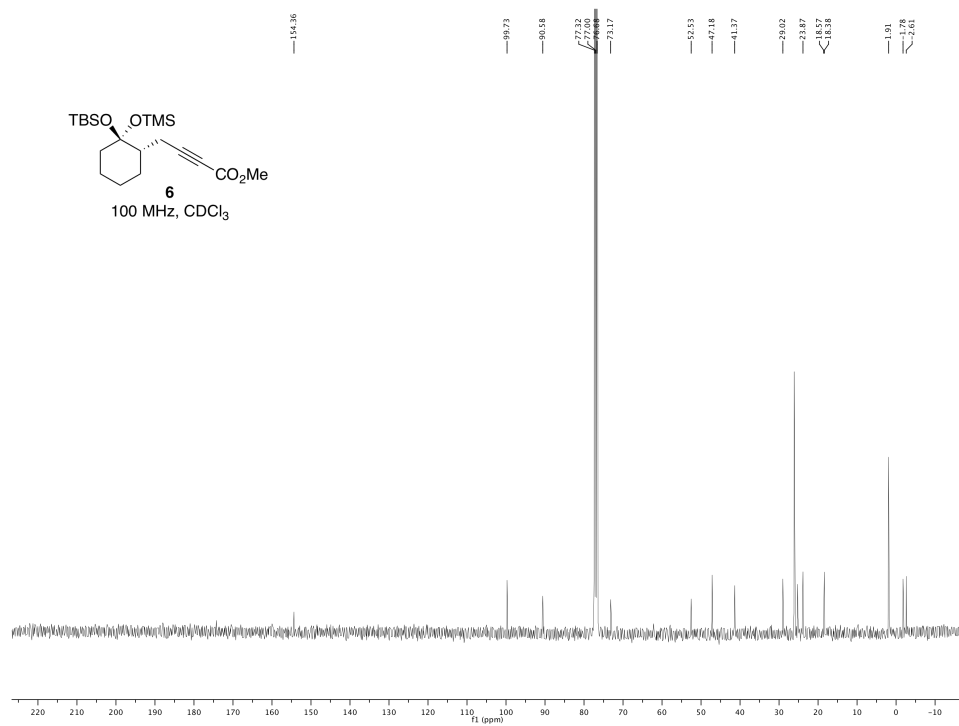

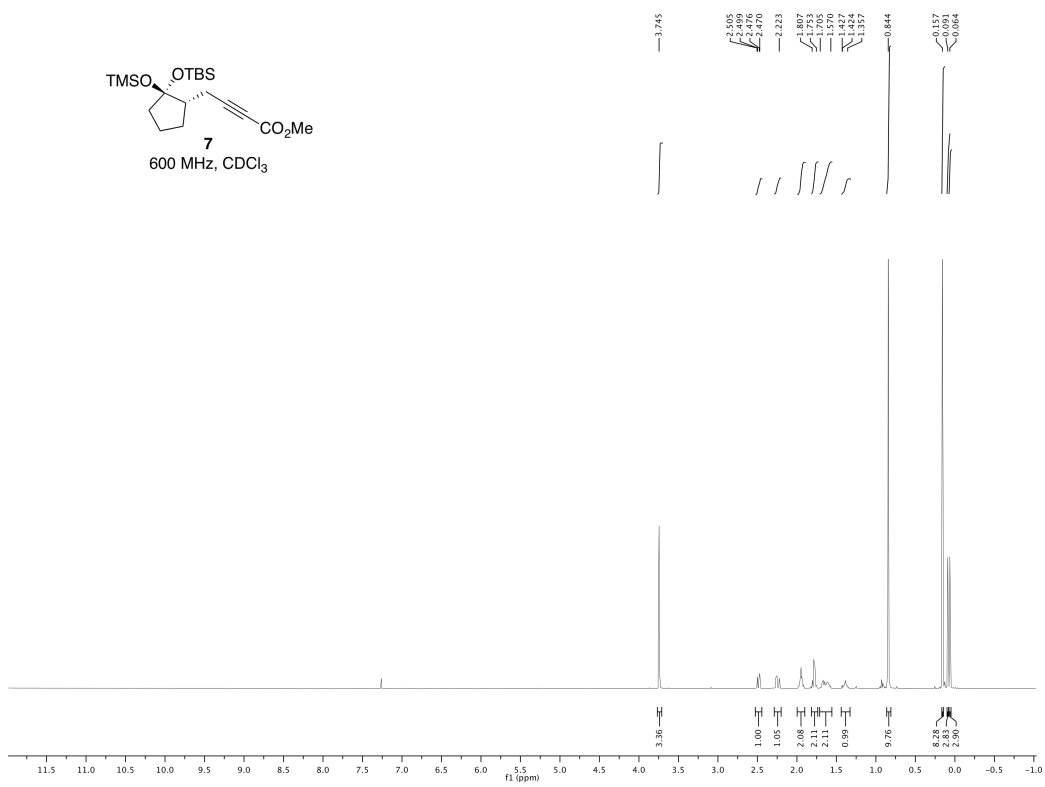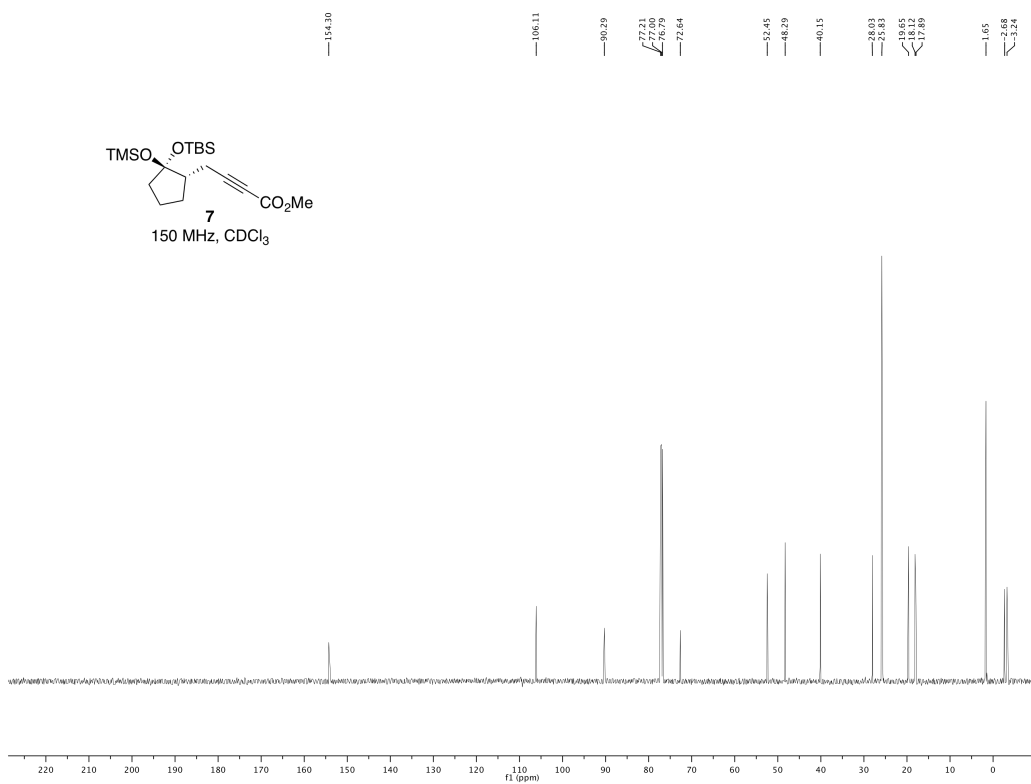

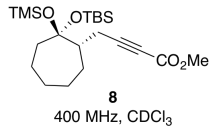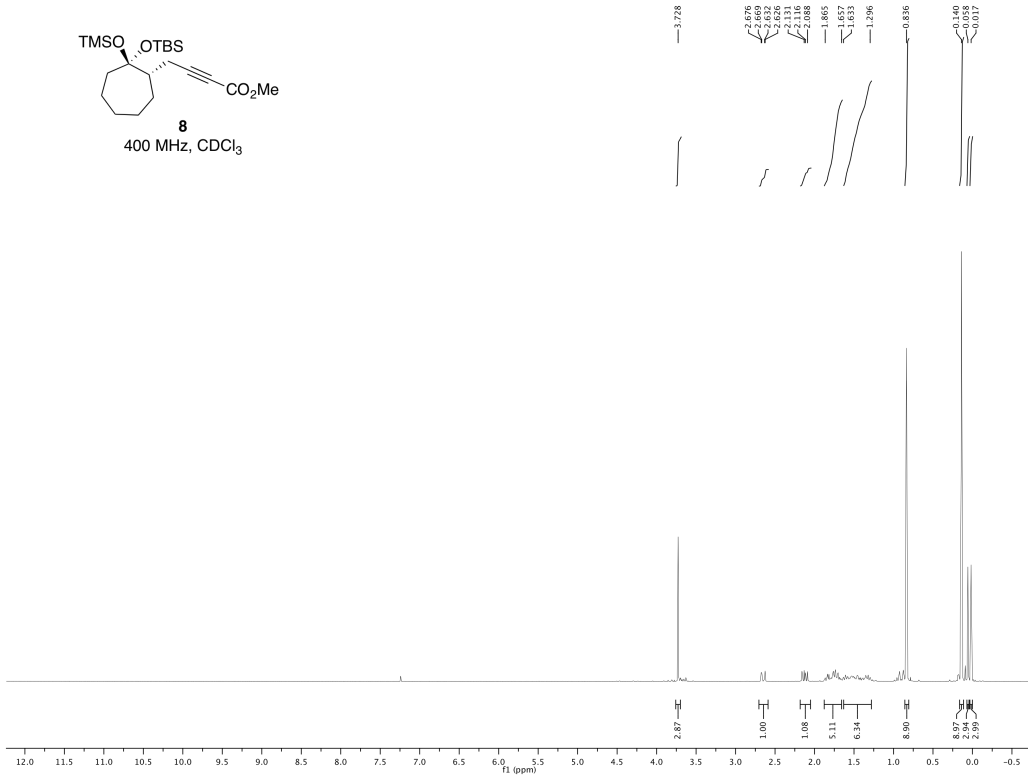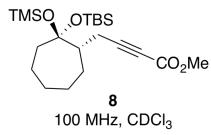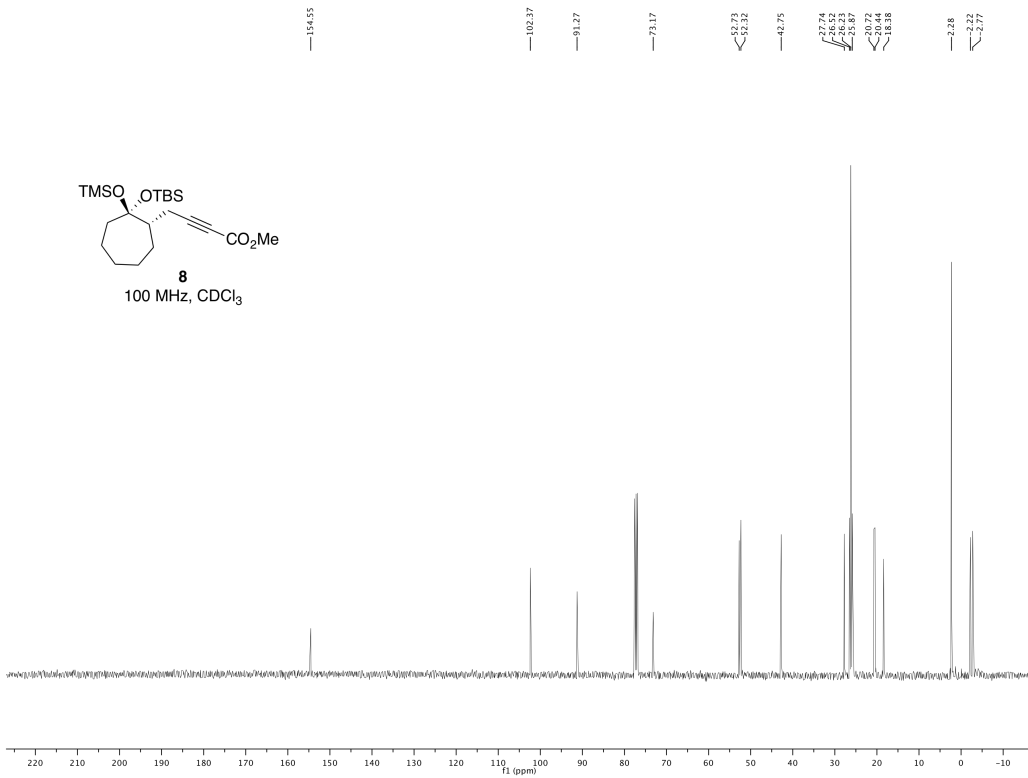

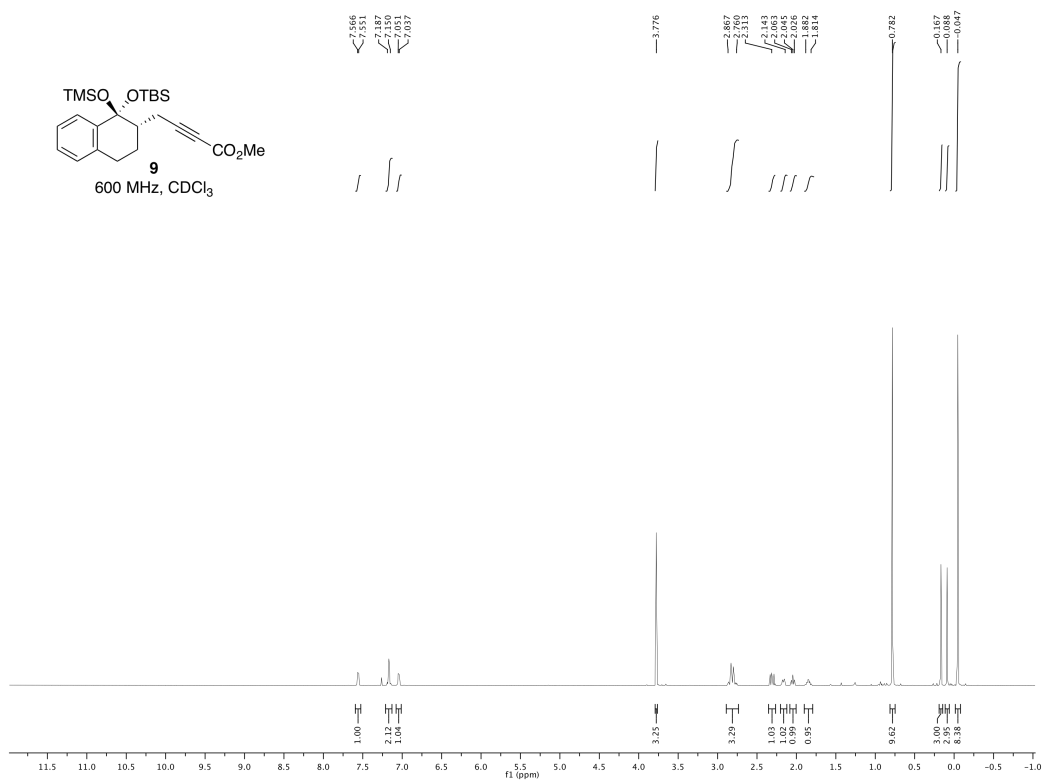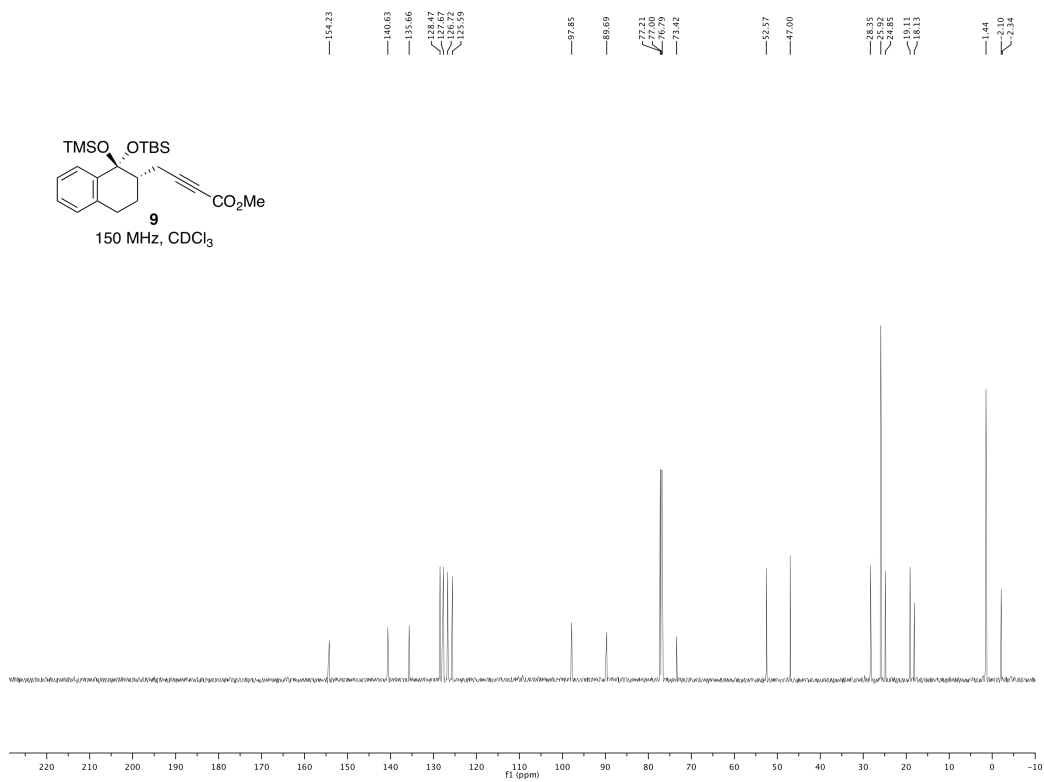



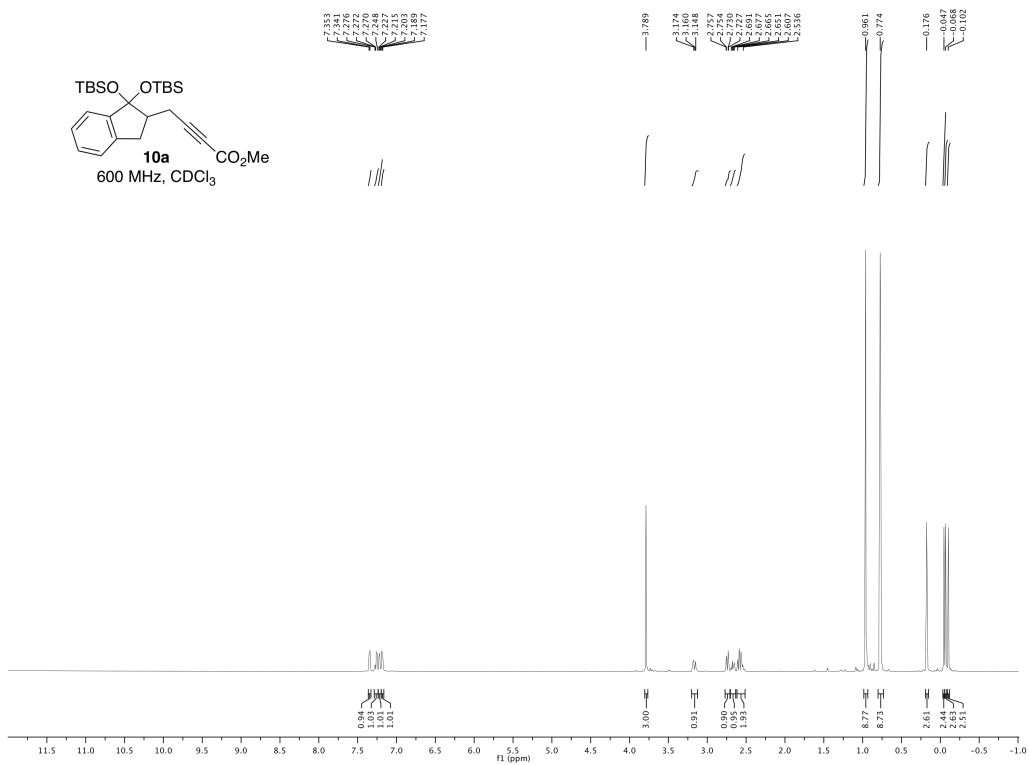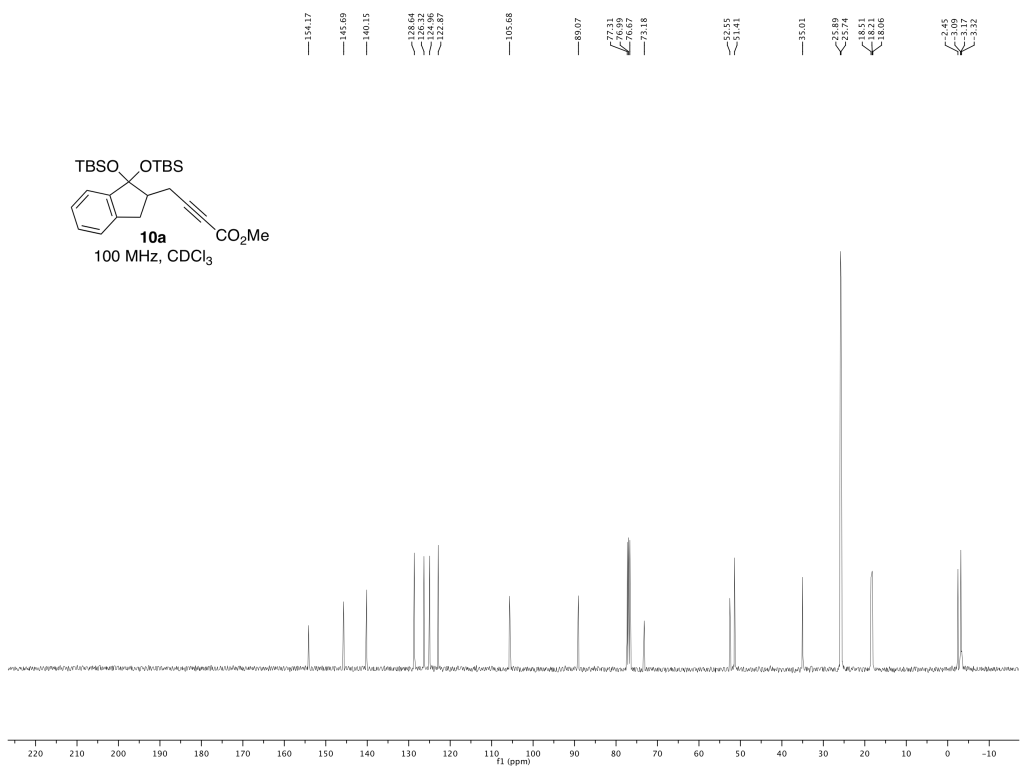

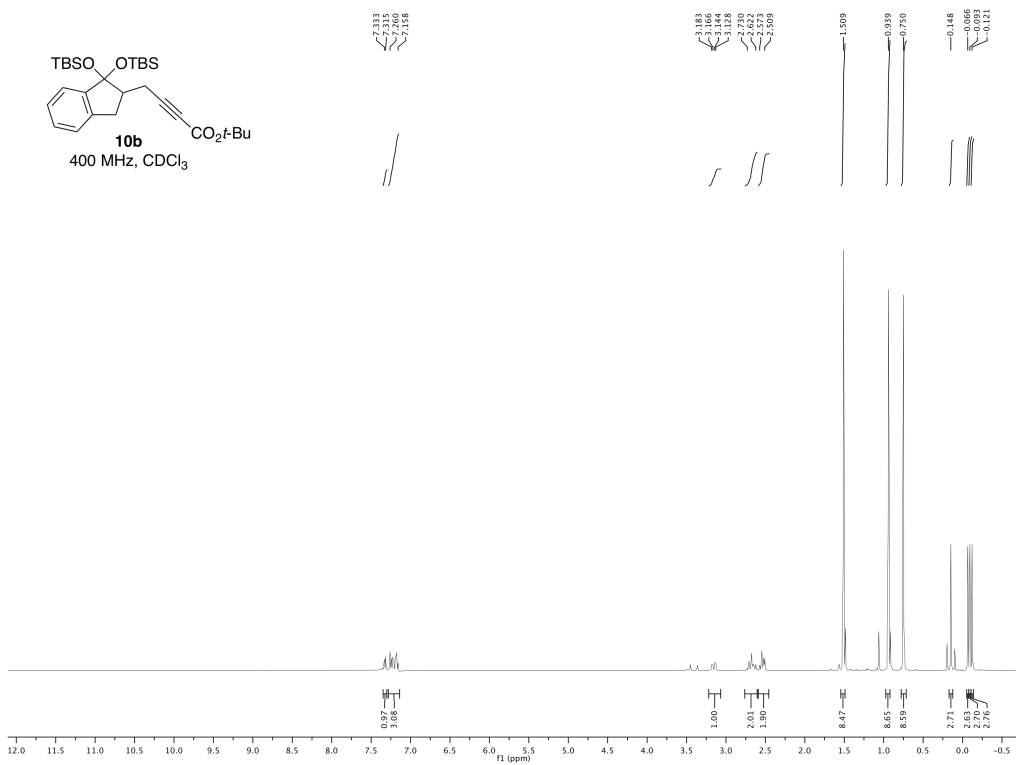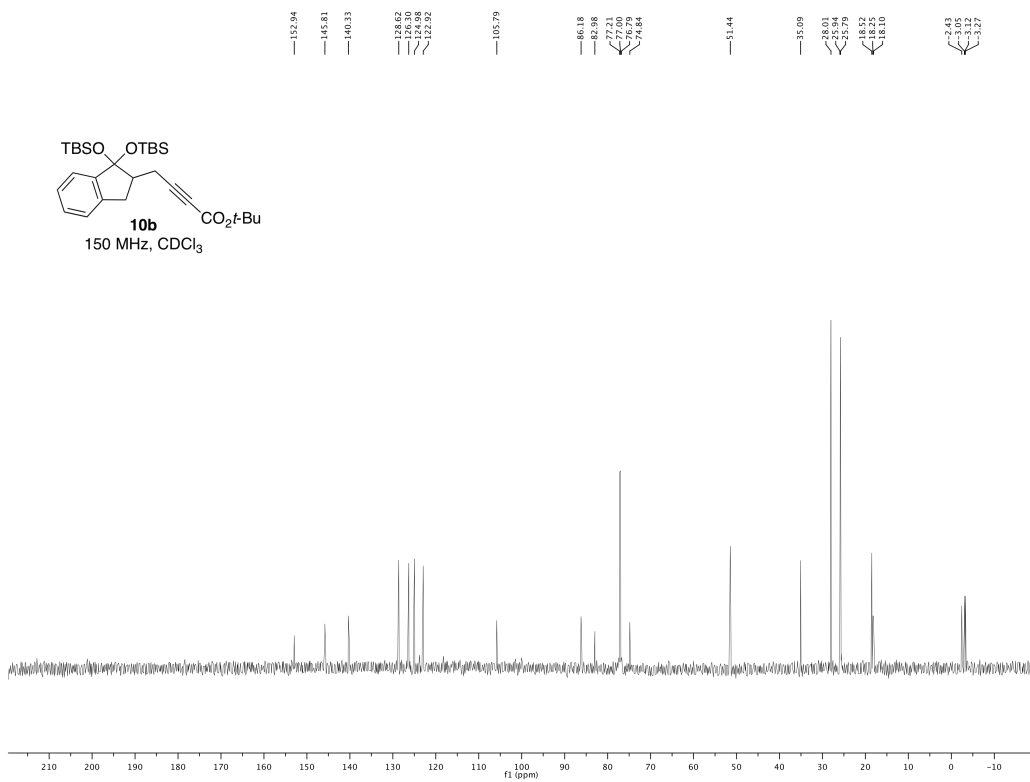

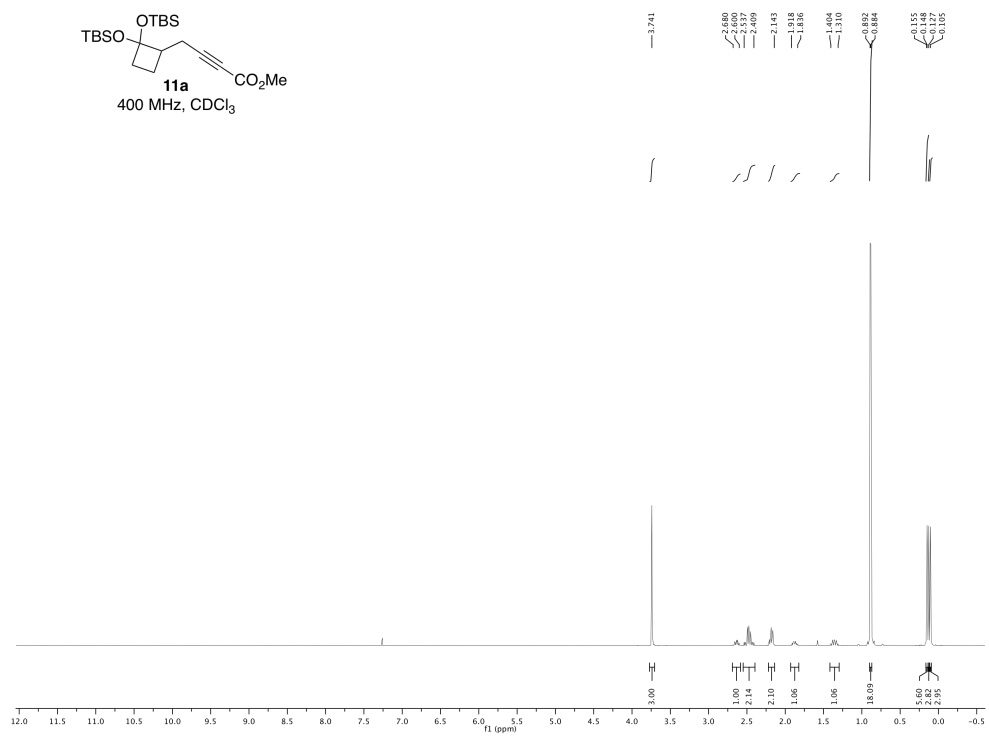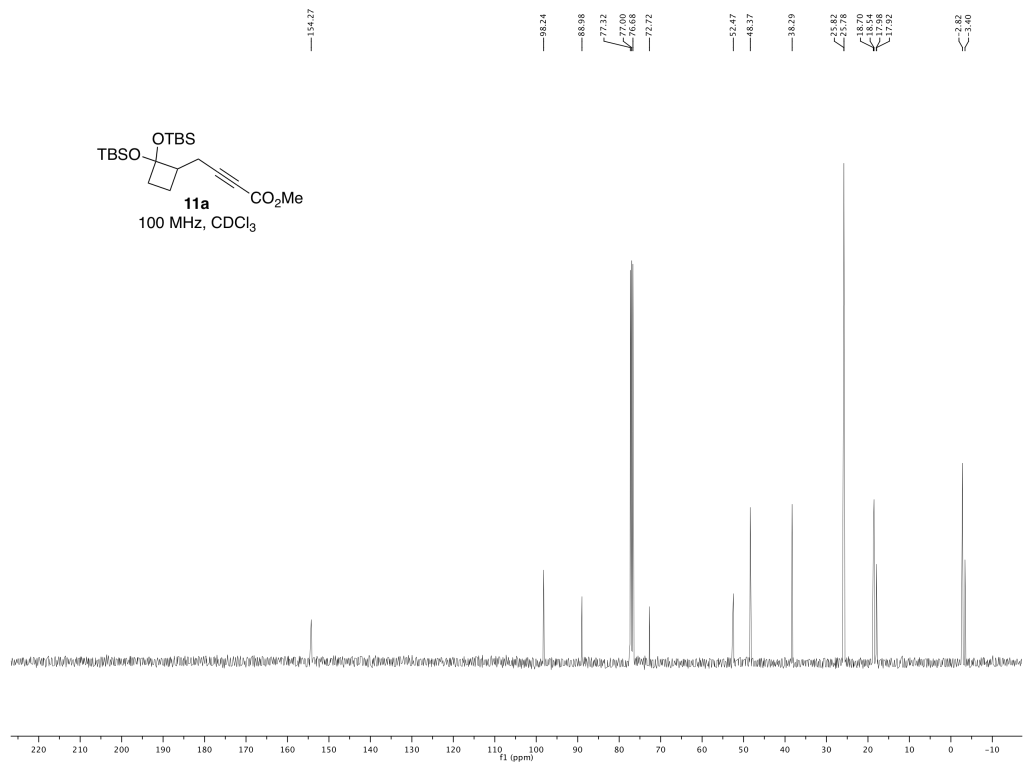

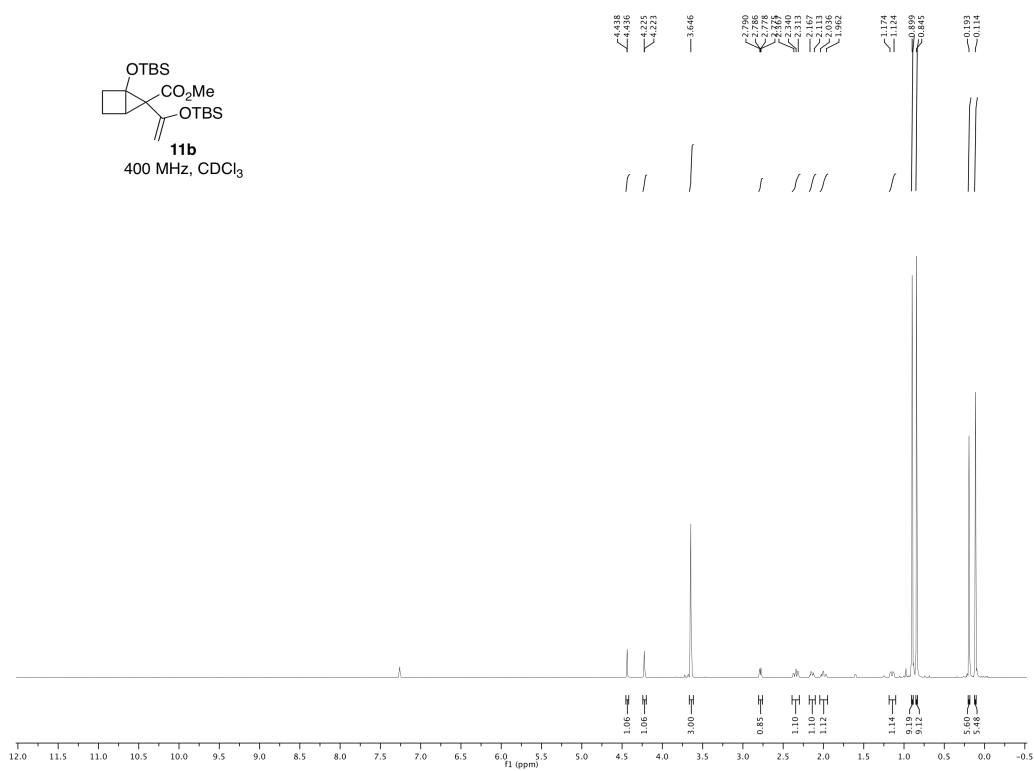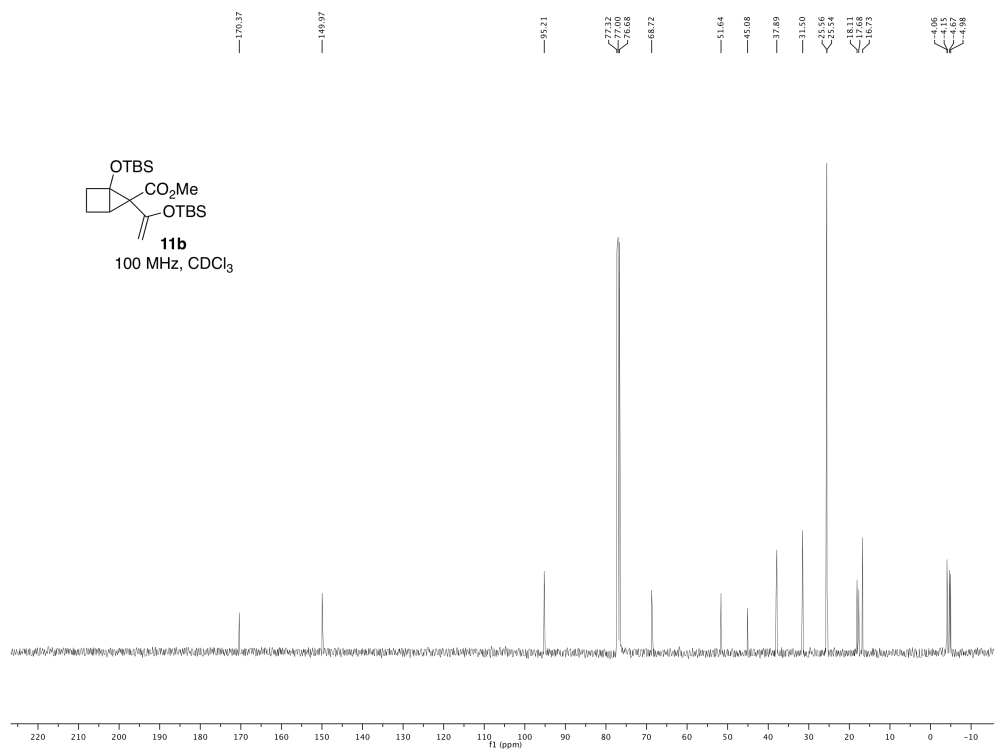

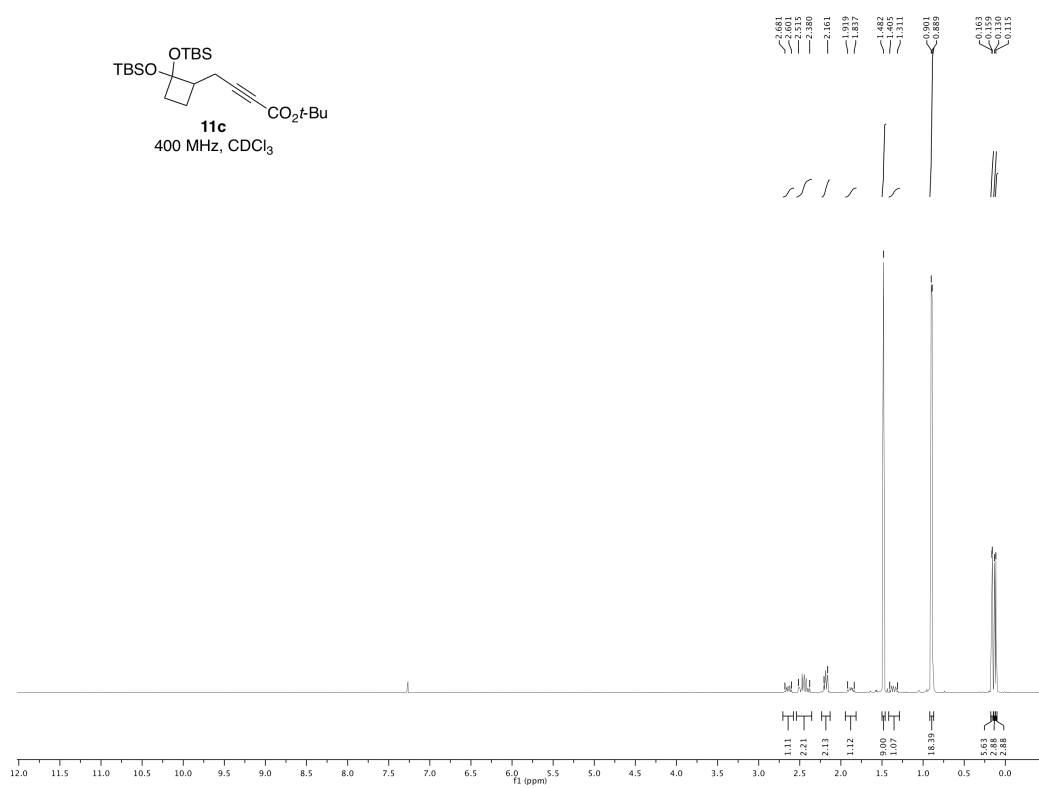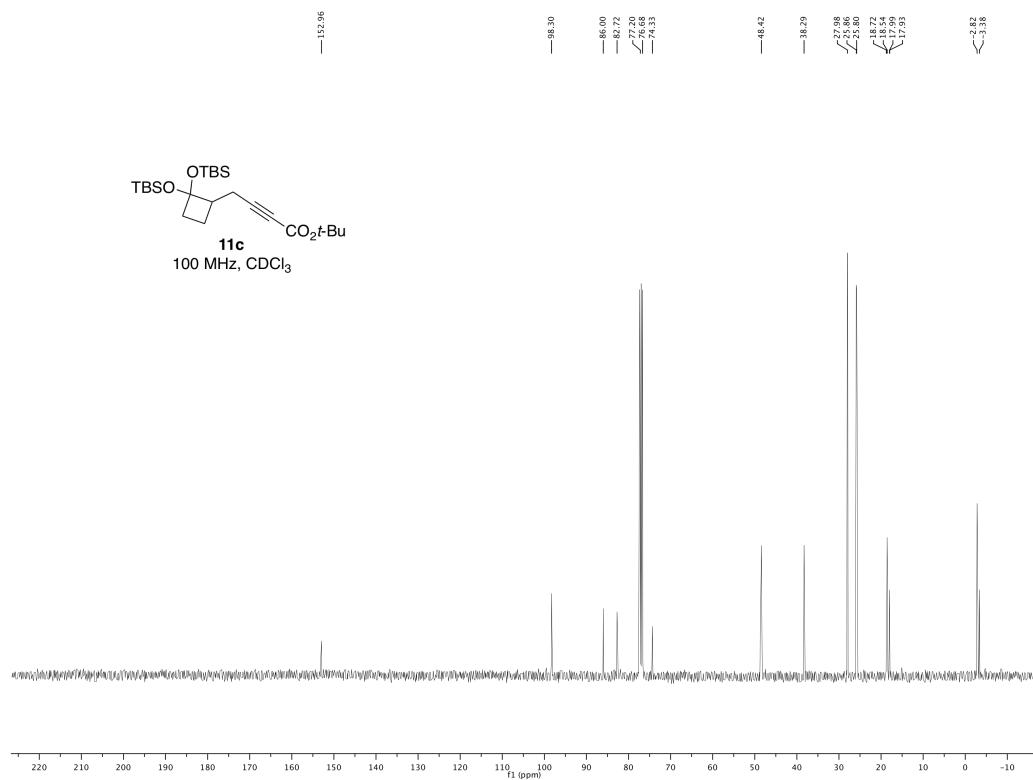

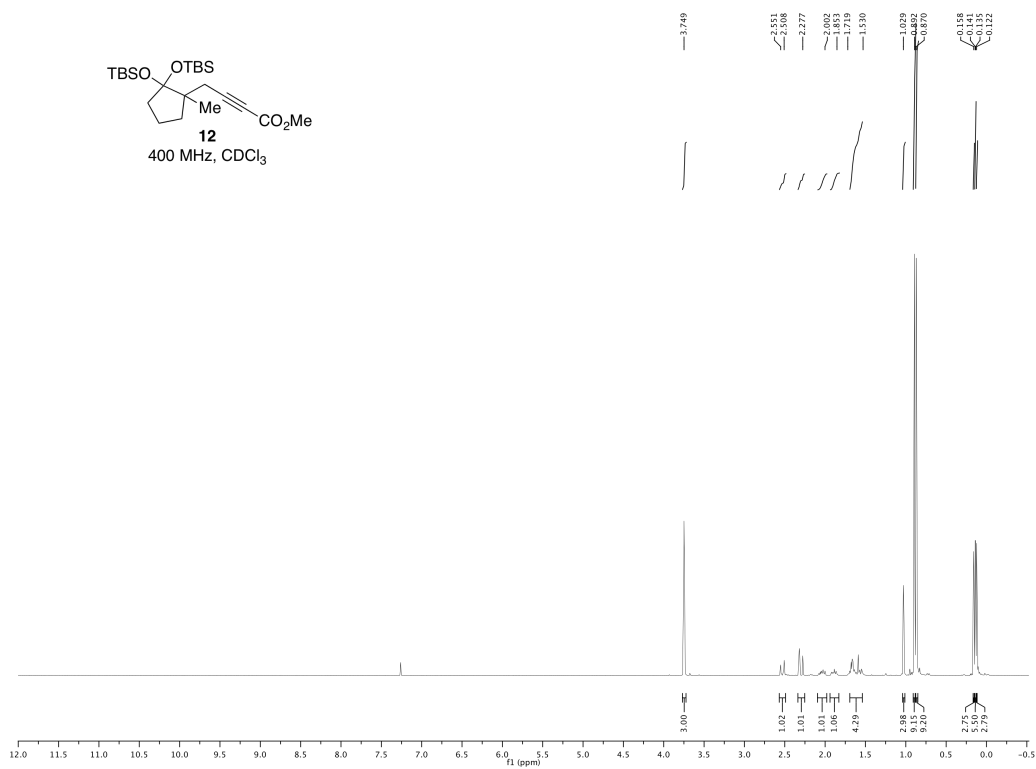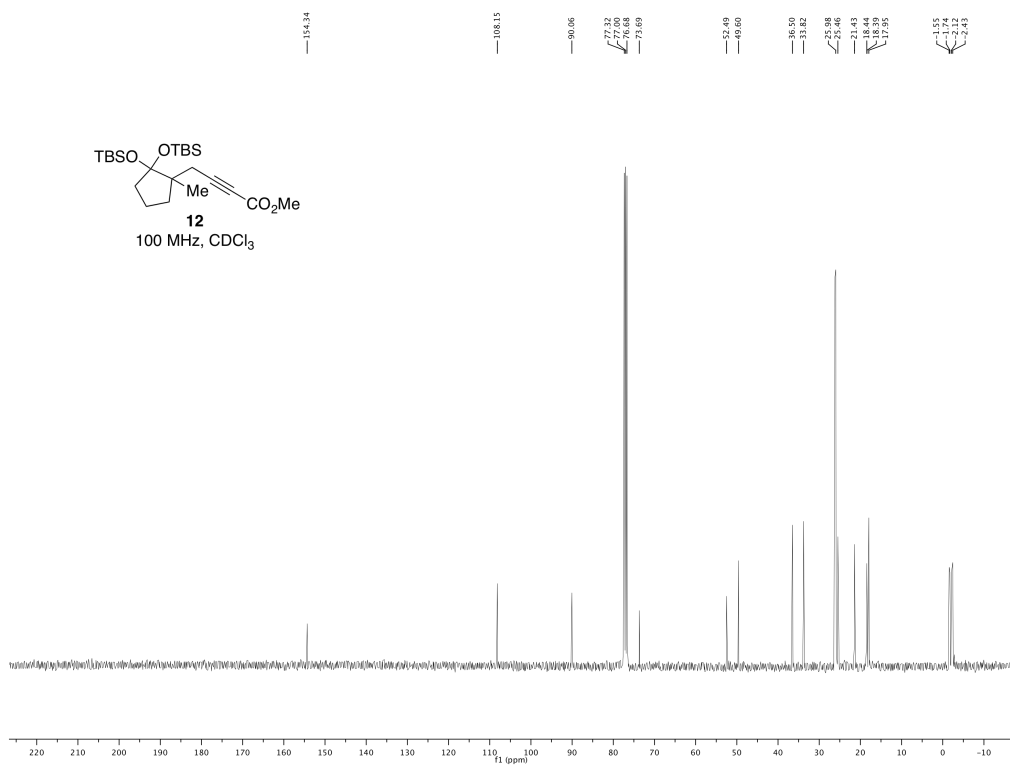

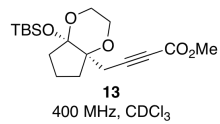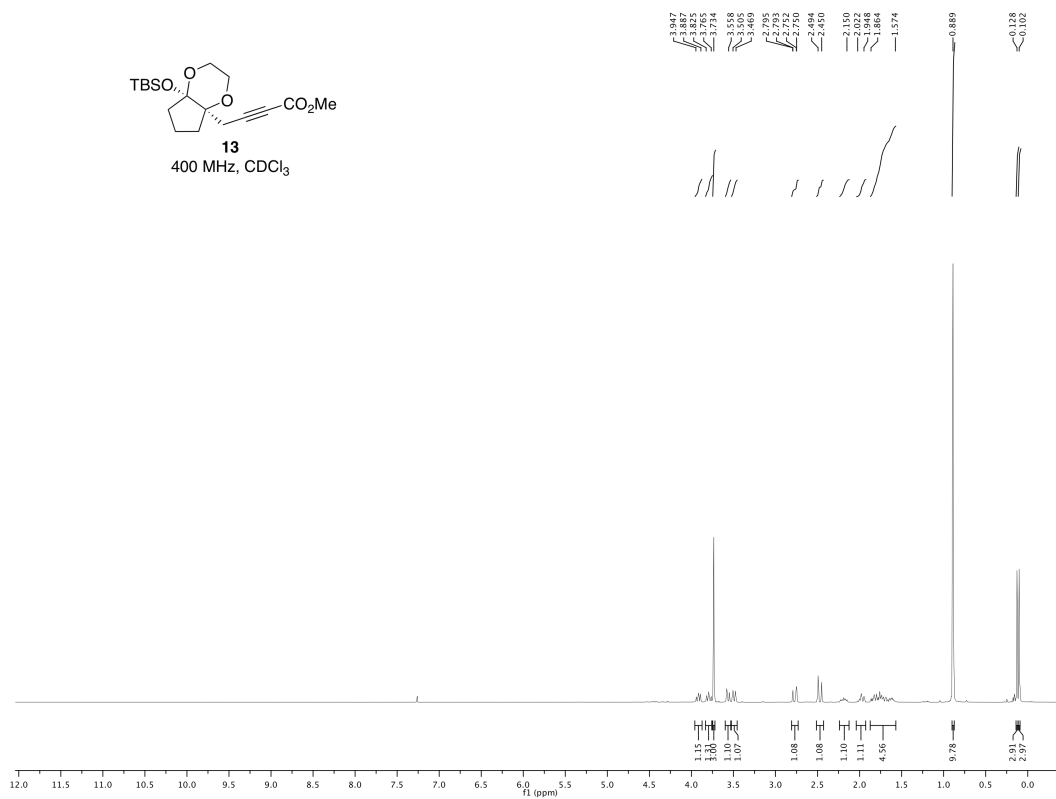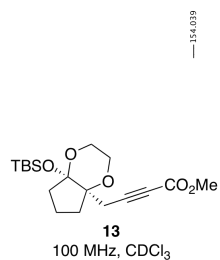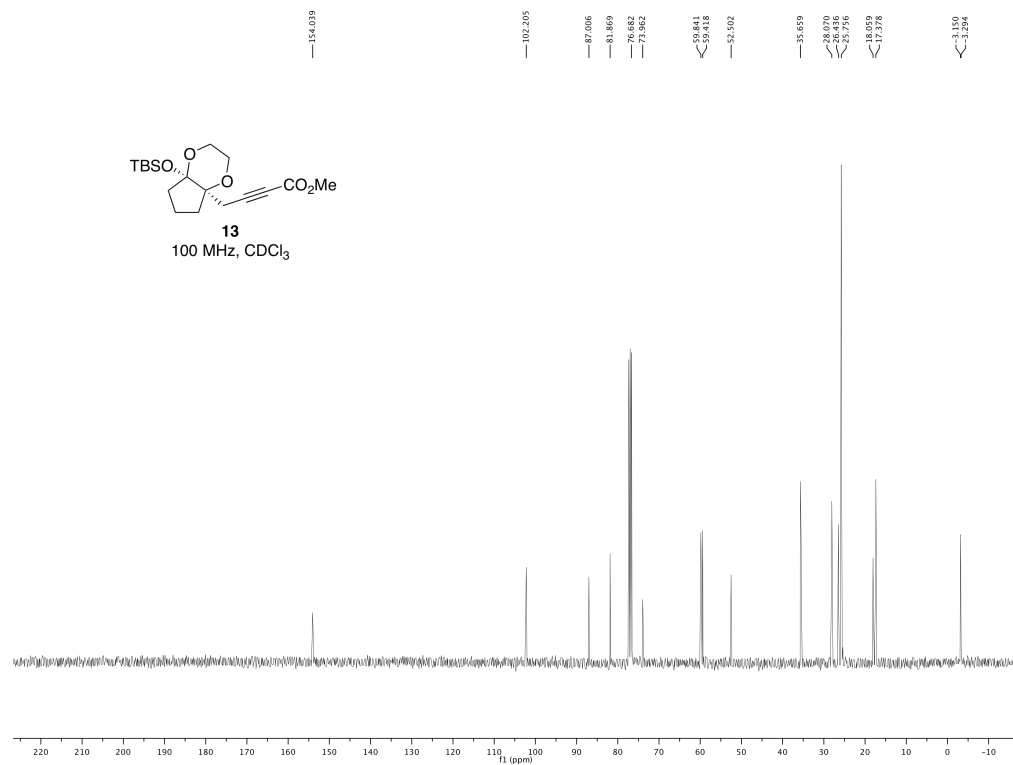

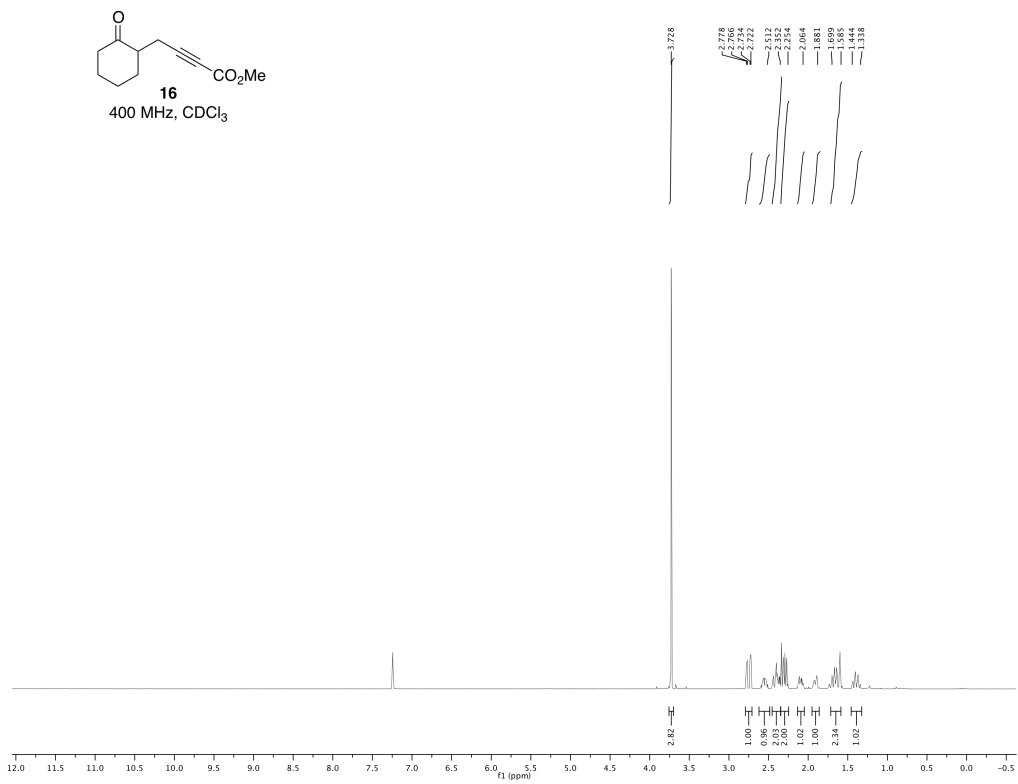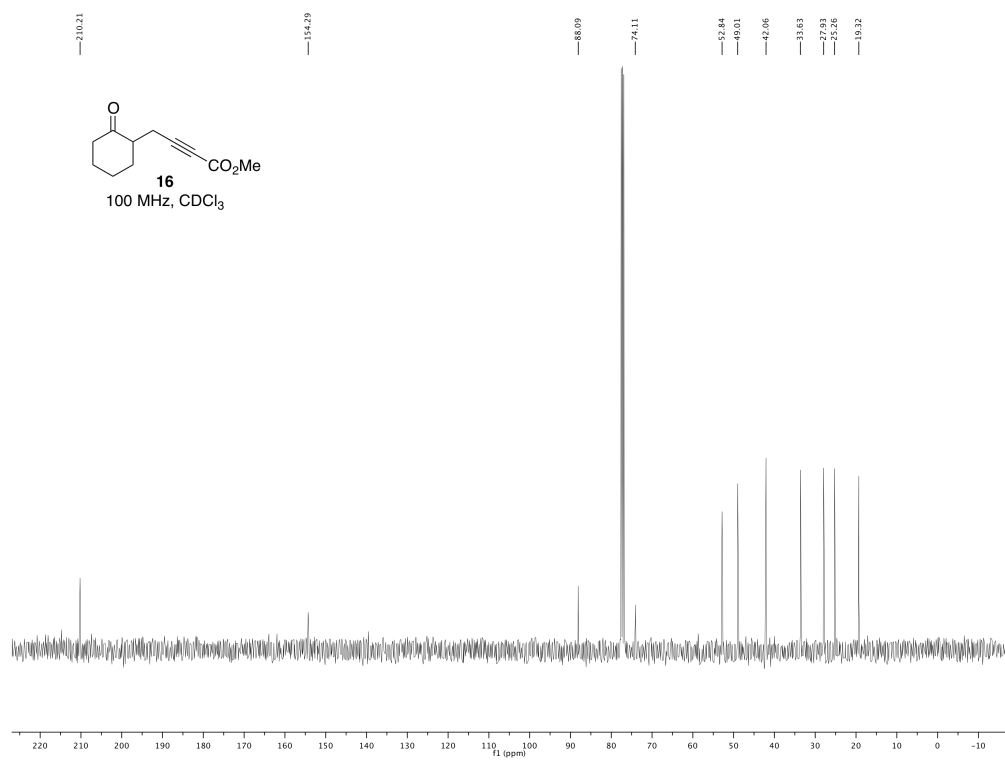



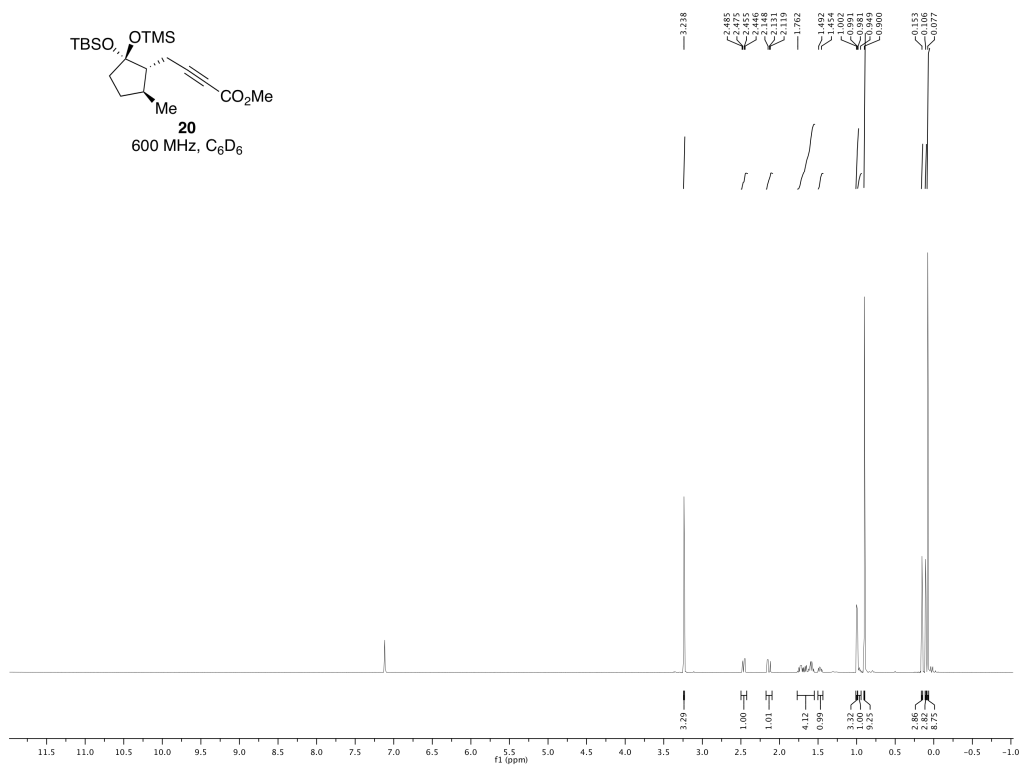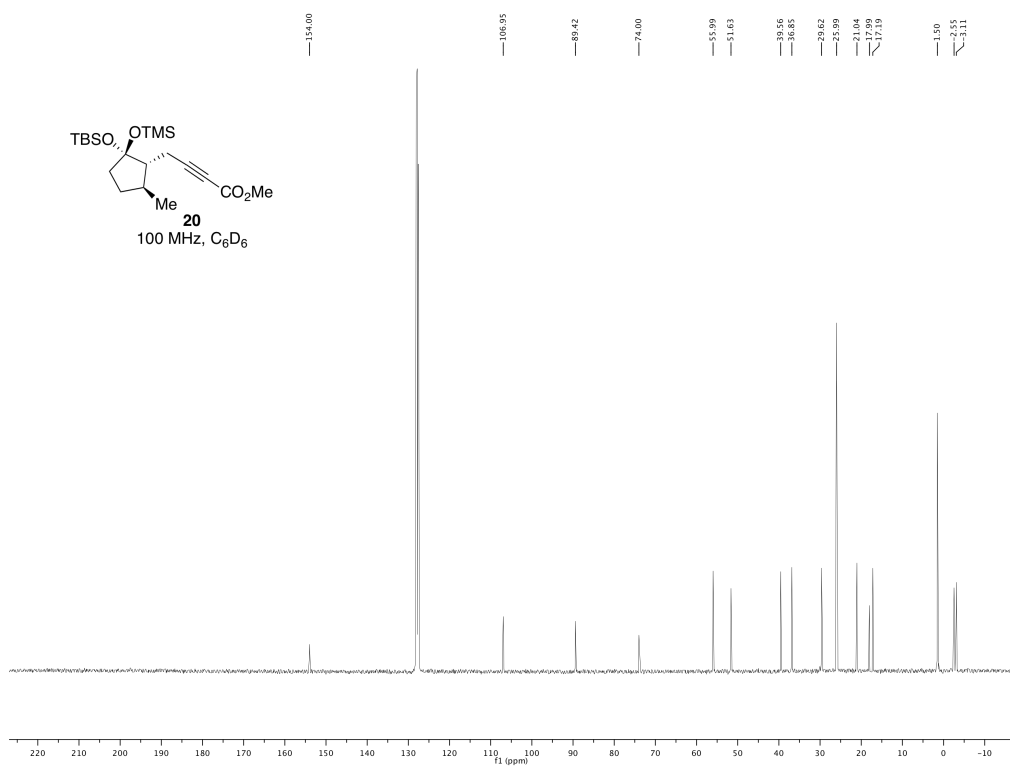

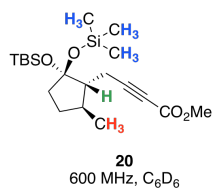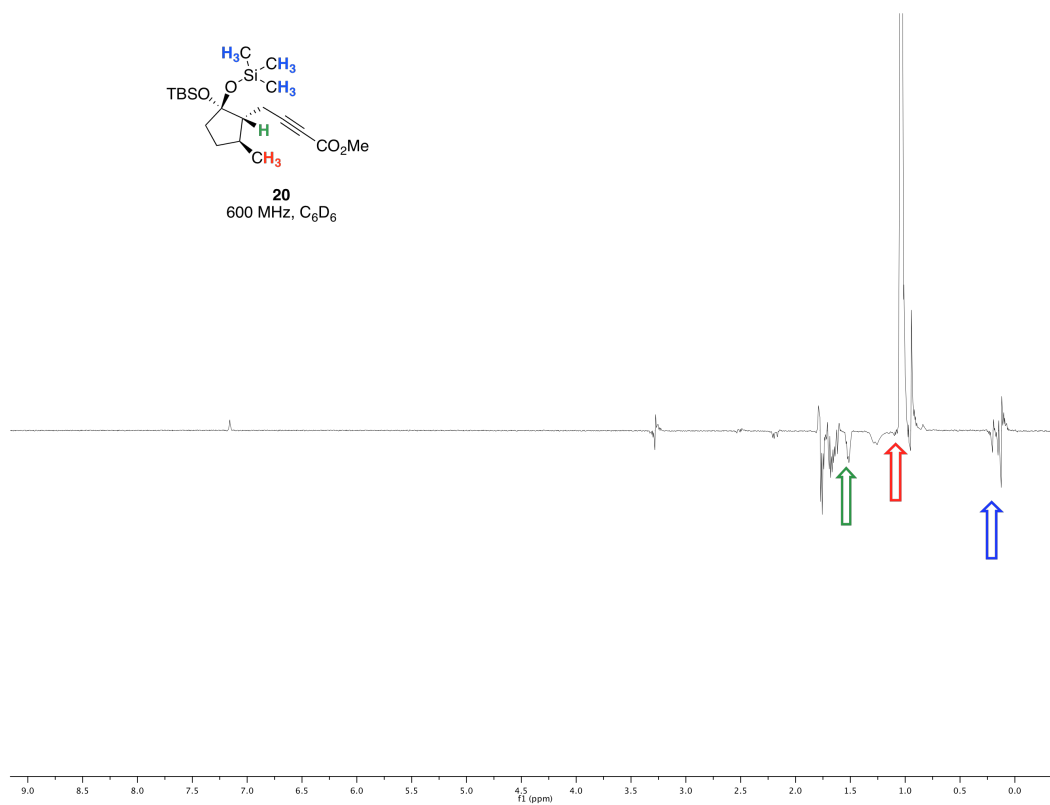

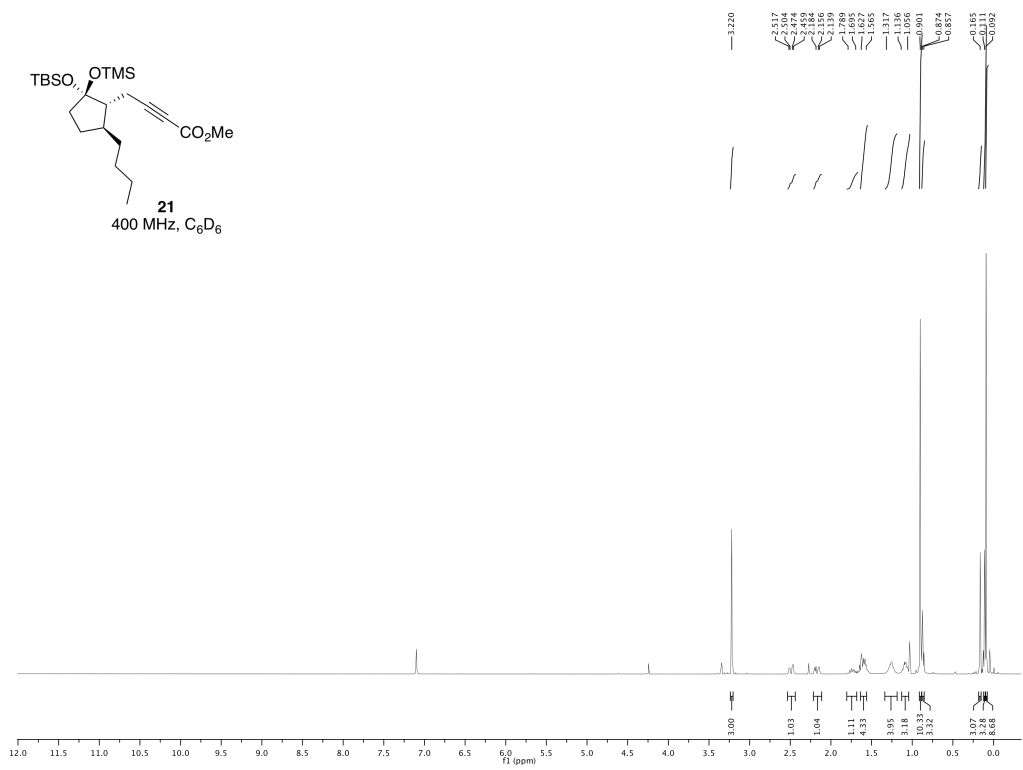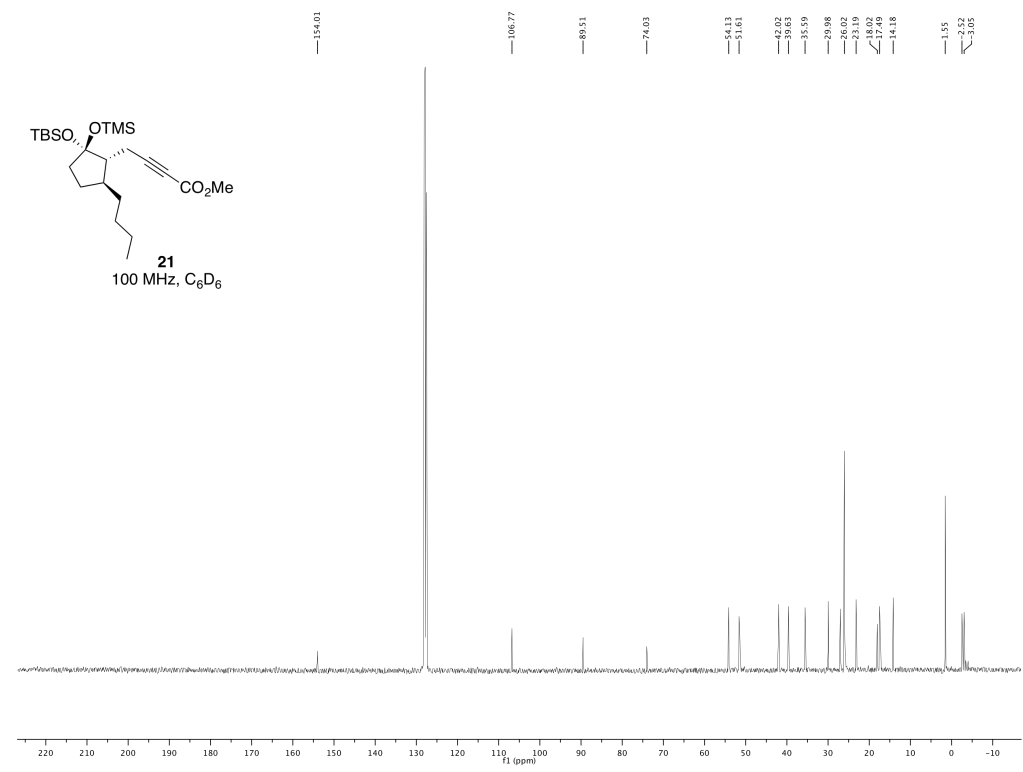

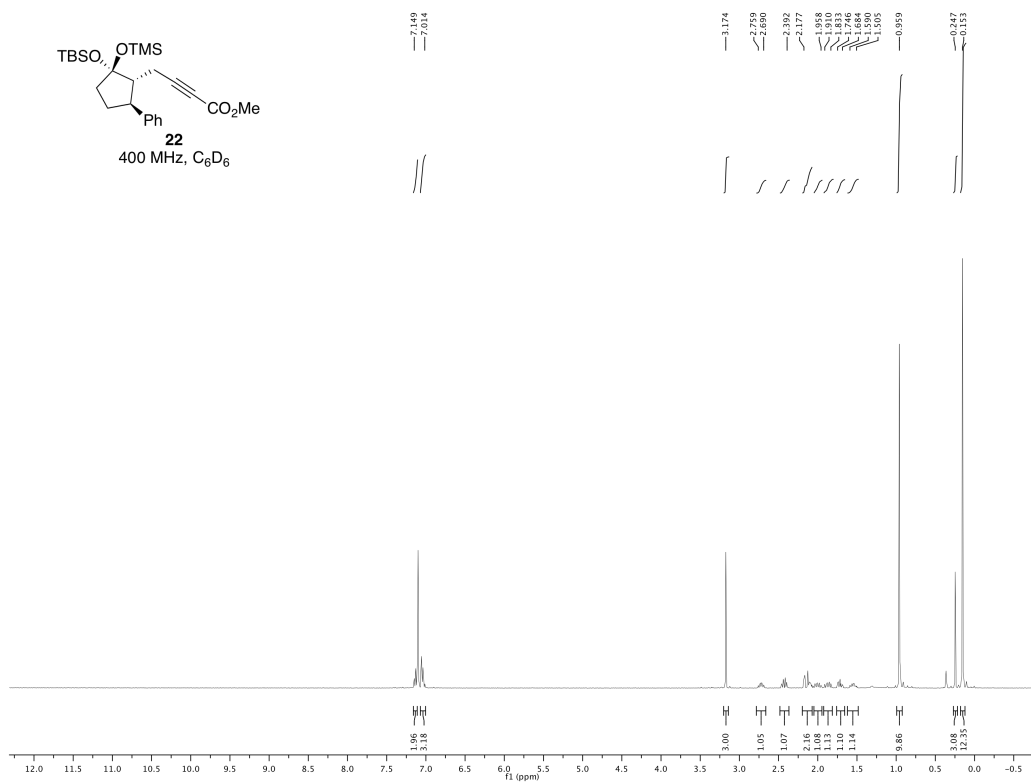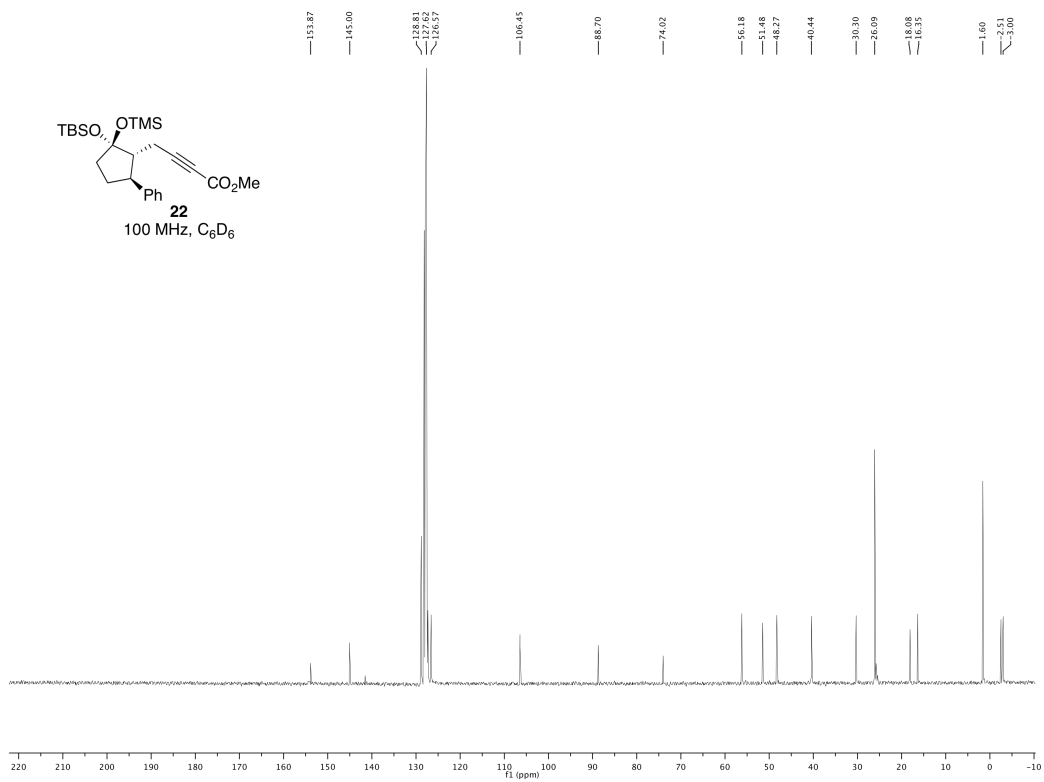

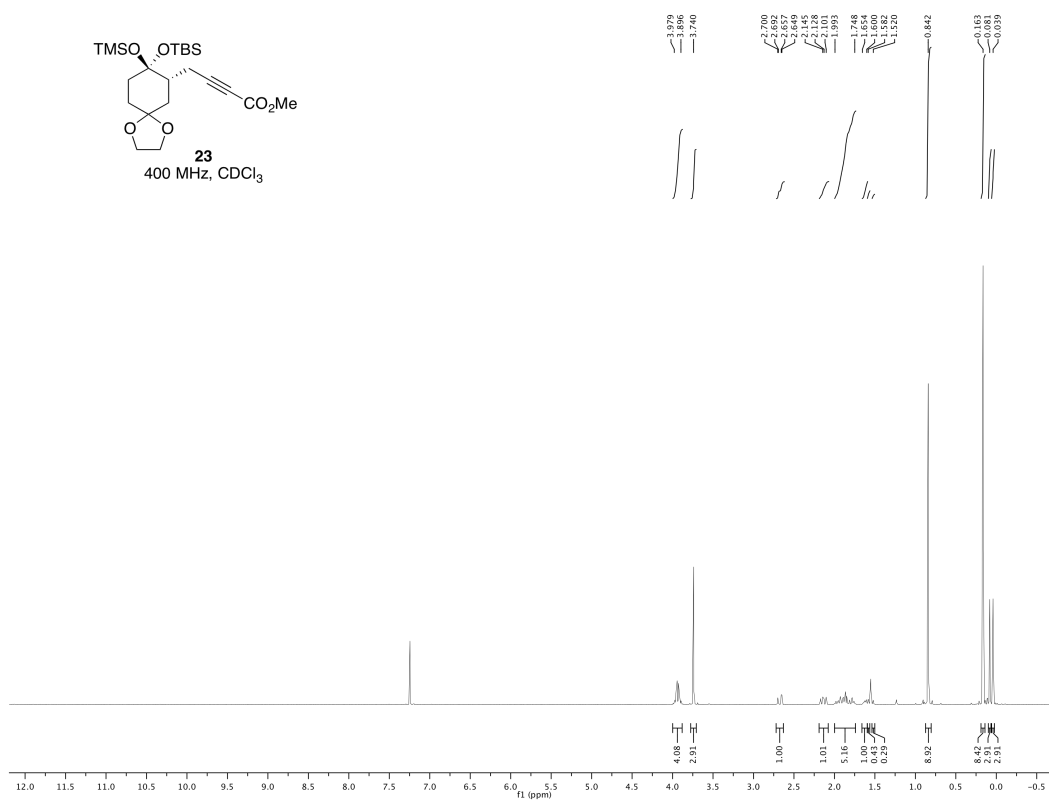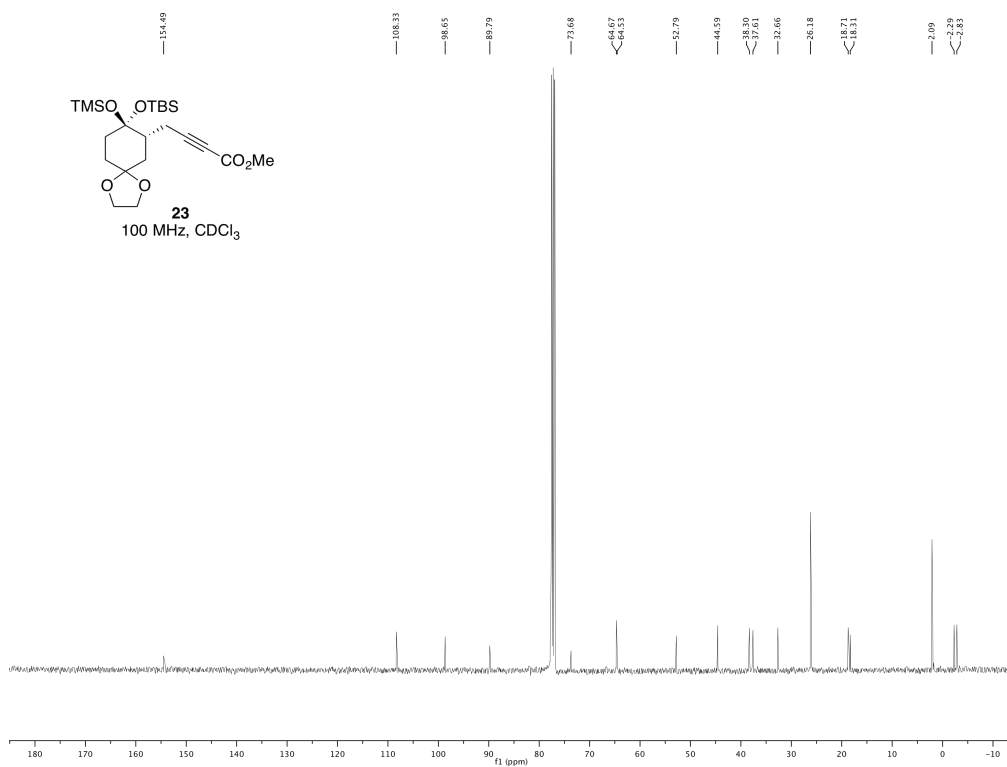

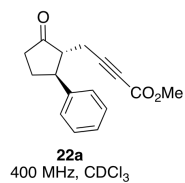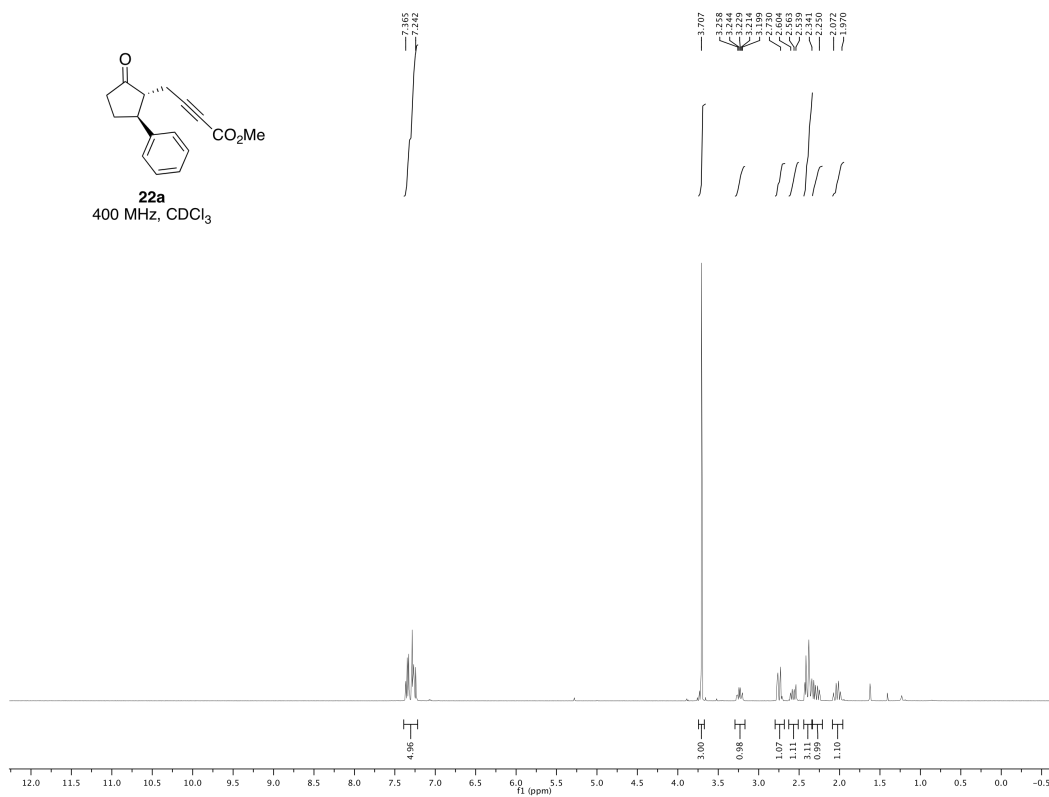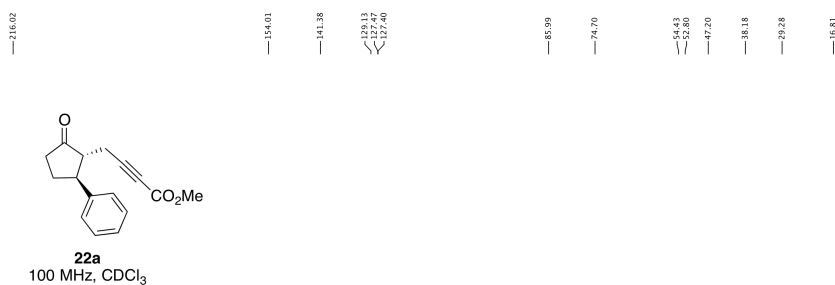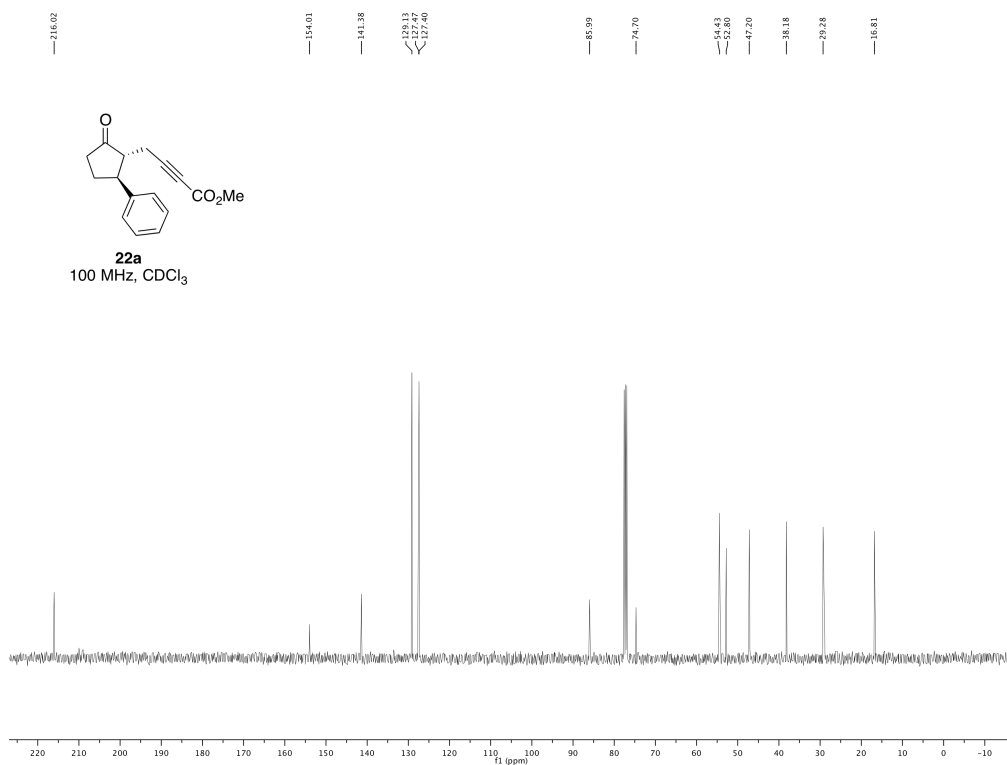

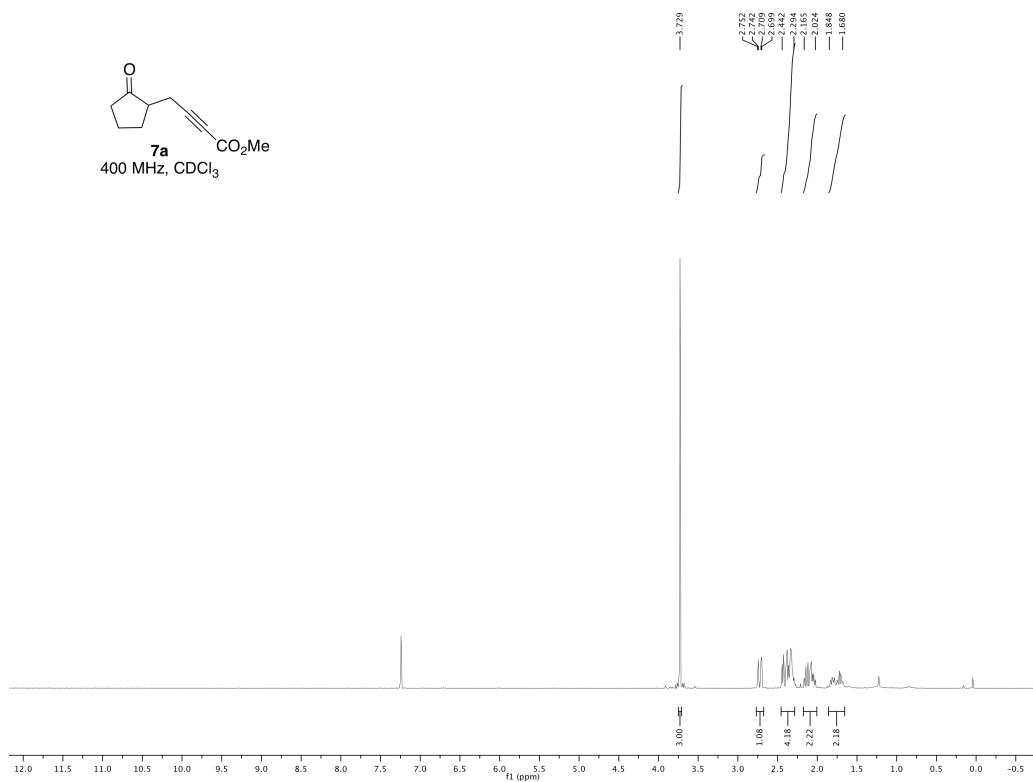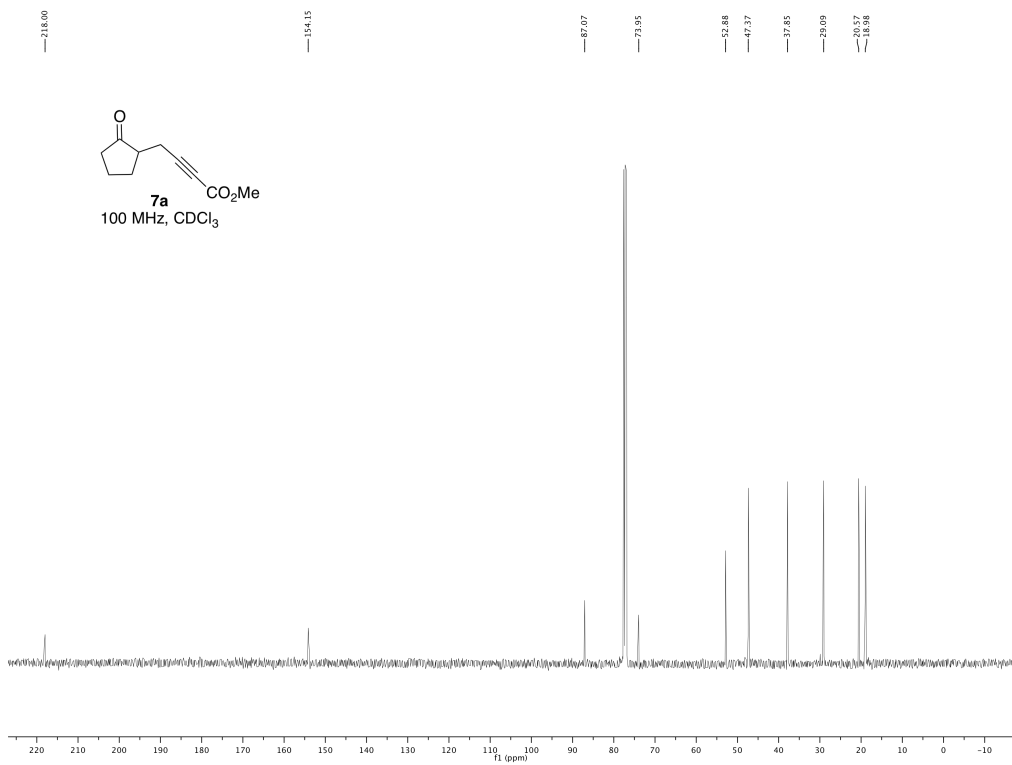

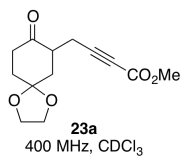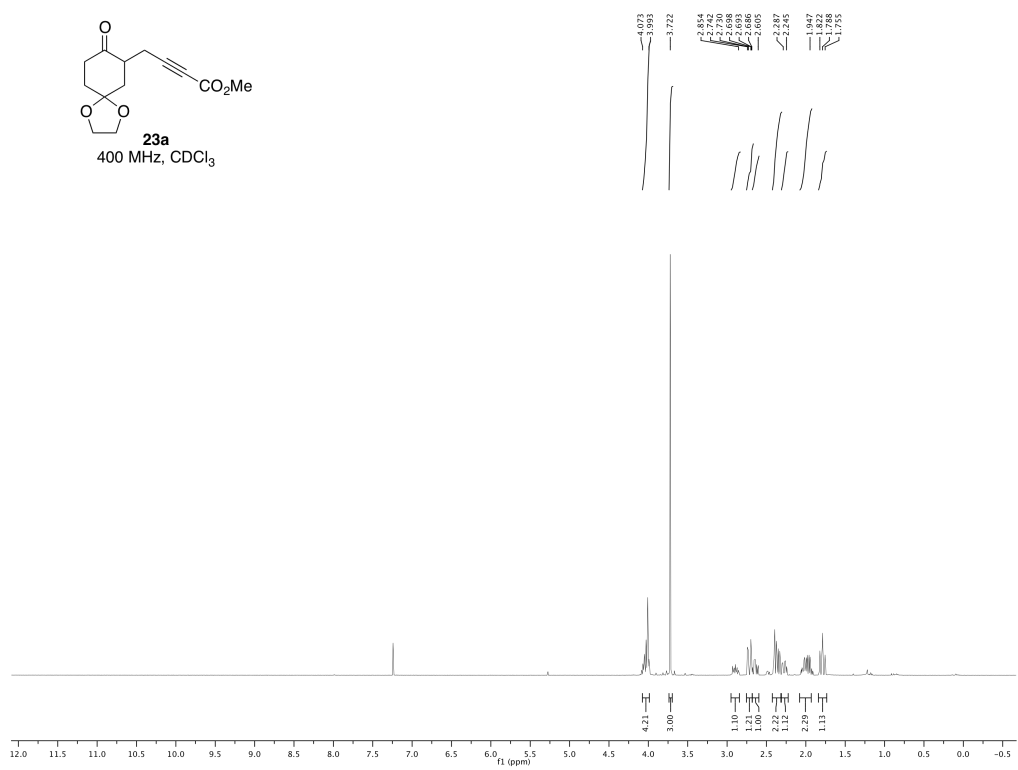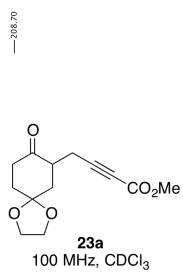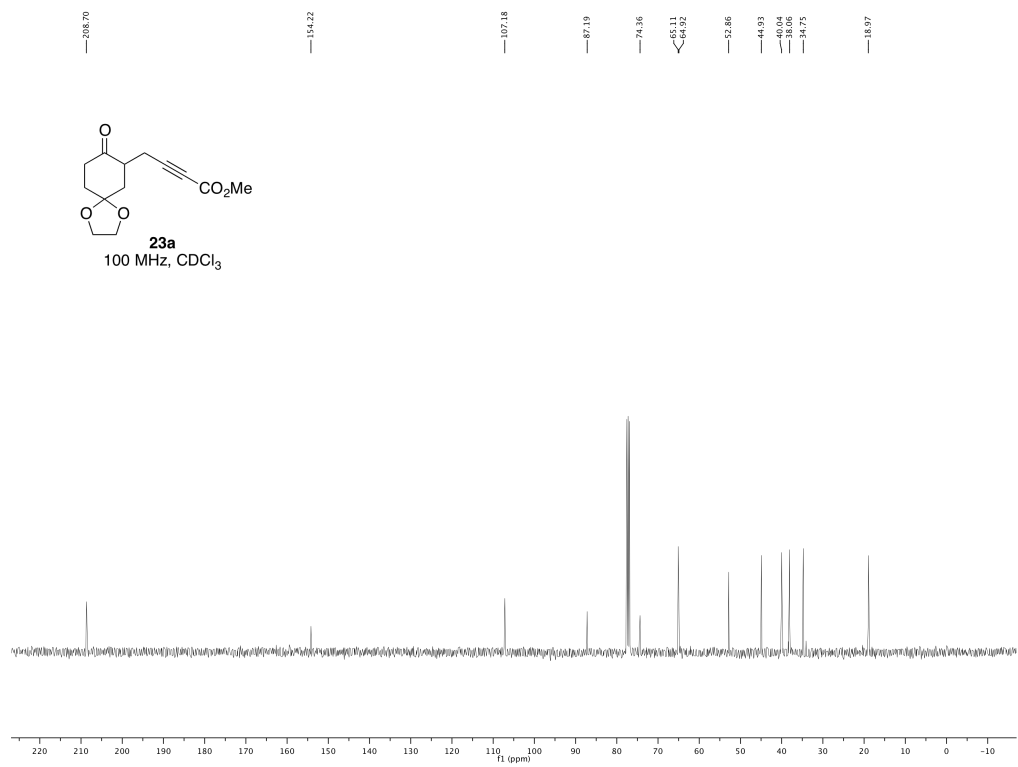



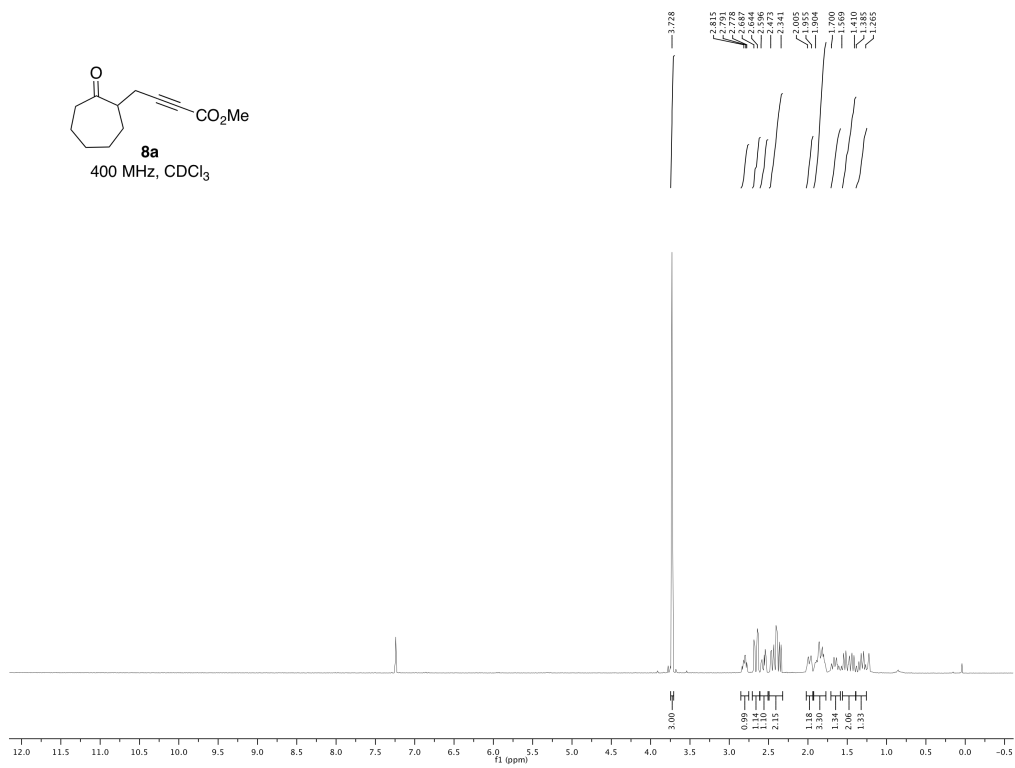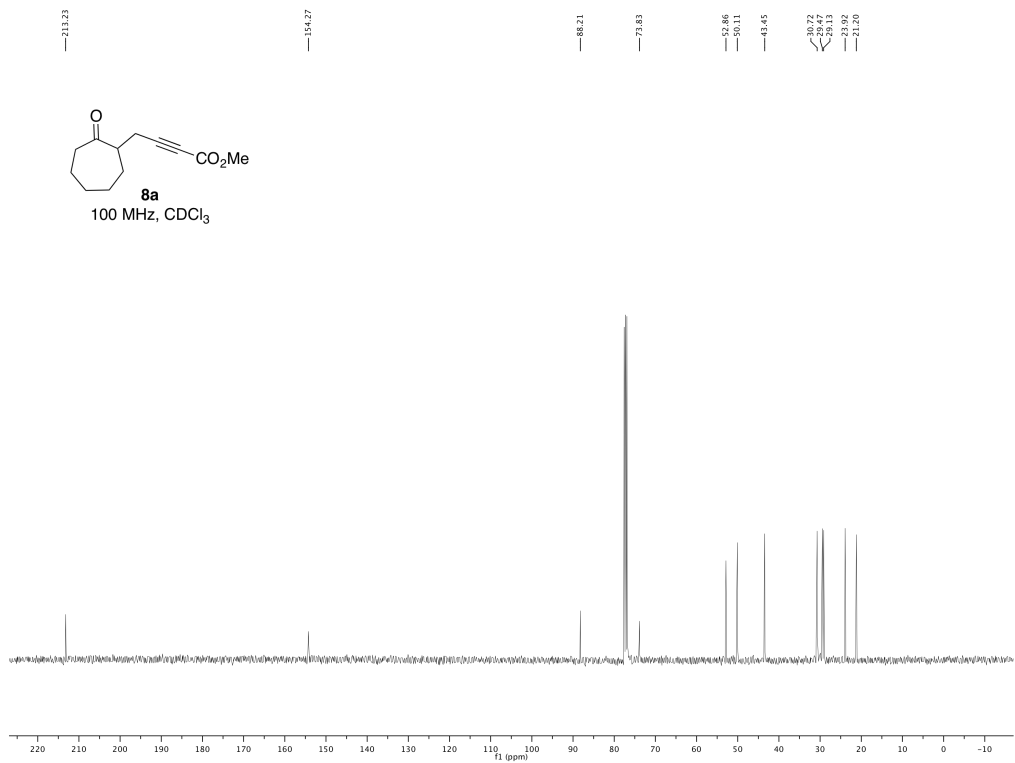

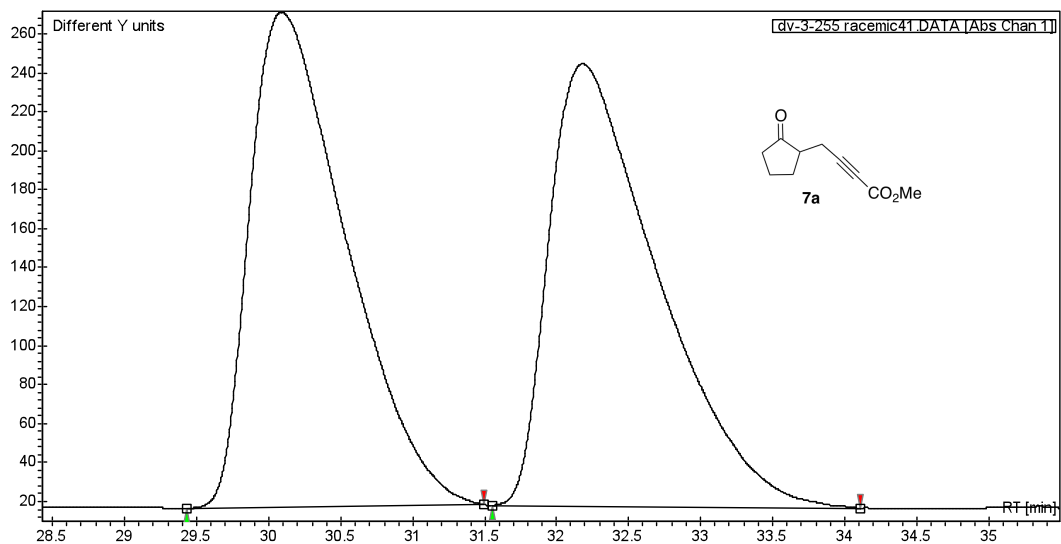

| # | Time [Min] | Quantity [% Area] | Height [mAU] | Area [mAU.Min] | Area % [%] |
|---|------------|-------------------|--------------|----------------|------------|
| 1 | 30.09      | 49.80             | 254.2        | 197.6          | 49.802     |
| 2 | 32.18      | 50.20             | 227.1        | 199.2          | 50.198     |

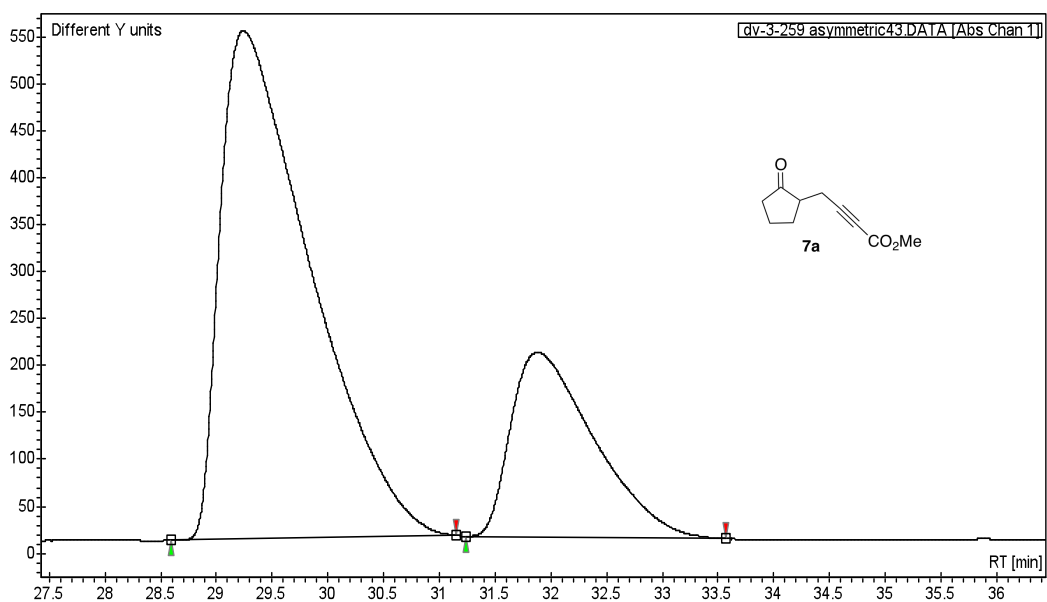

| # | Time [Min] | Quantity [% Area] | Height [mAU] | Area [mAU.Min] | Area % [%] |
|---|------------|-------------------|--------------|----------------|------------|
| 1 | 29.24      | 74.90             | 541.5        | 507.8          | 74.899     |
| 2 | 31.88      | 25.10             | 196.4        | 170.2          | 25.101     |

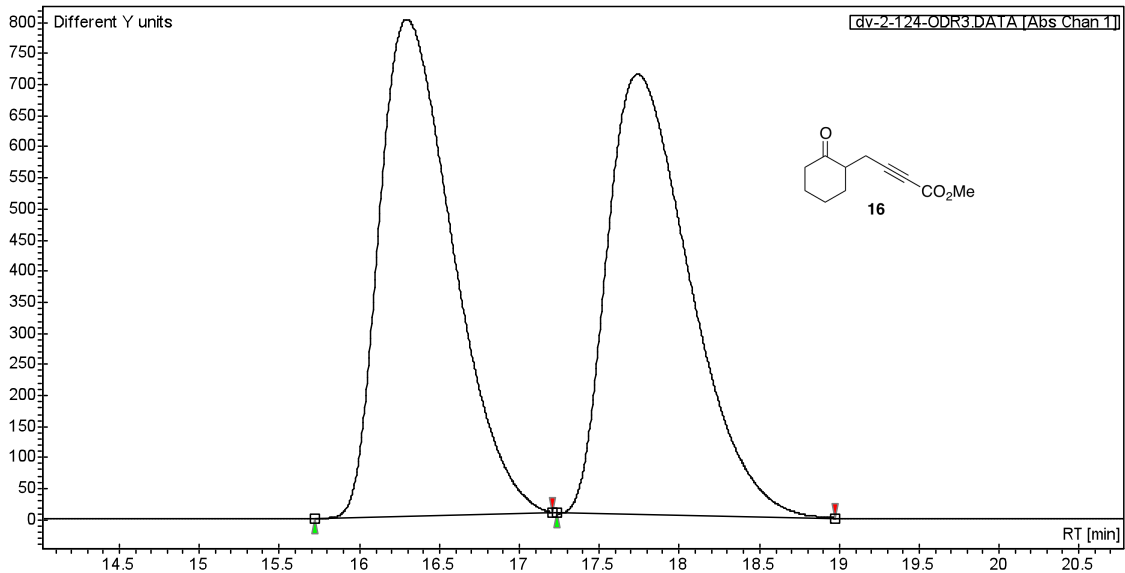

| # | Time [Min] | Quantity [% Area] | Height [mAU] | Area [mAU.Min] | Area % [%] |
|---|------------|-------------------|--------------|----------------|------------|
| 1 | 16.30      | 50.07             | 799.1        | 425.7          | 50.068     |
| 2 | 17.74      | 49.93             | 708.1        | 424.6          | 49.932     |

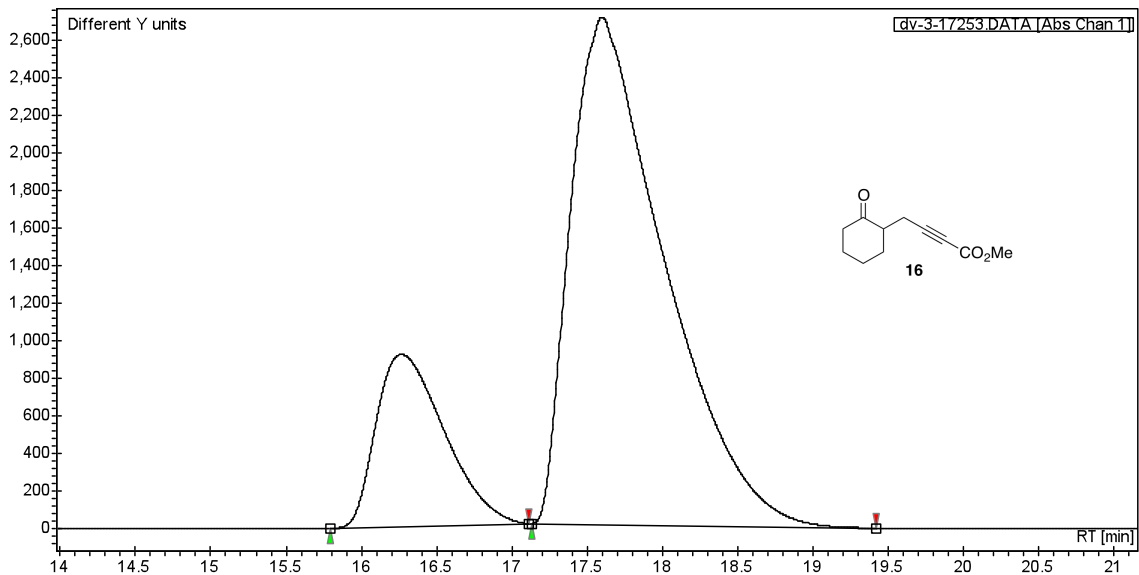

| # | Time [Min] | Quantity [% Area] | Height [mAU] | Area [mAU.Min] | Area % [%] |
|---|------------|-------------------|--------------|----------------|------------|
| 1 | 16.26      | 19.84             | 918.2        | 483.7          | 19.842     |
| 2 | 17.60      | 80.16             | 2704.6       | 1954.2         | 80.158     |

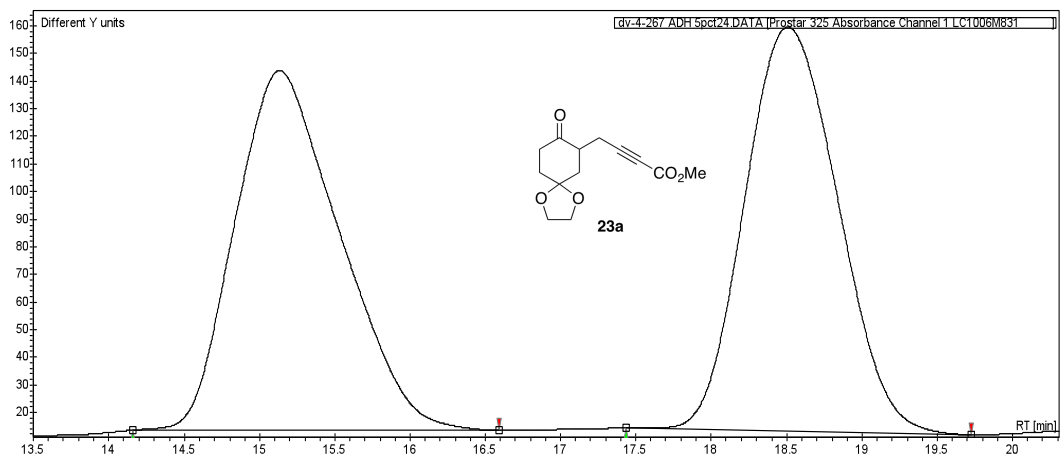

| # | Time [Min] | Quantity [% Area] | Height [mAU] | Area [mAU.Min] | Area % [%] |
|---|------------|-------------------|--------------|----------------|------------|
| 1 | 15.13      | 49.92             | 130.3        | 104.6          | 49.923     |
| 2 | 18.51      | 50.08             | 146.5        | 104.9          | 50.077     |

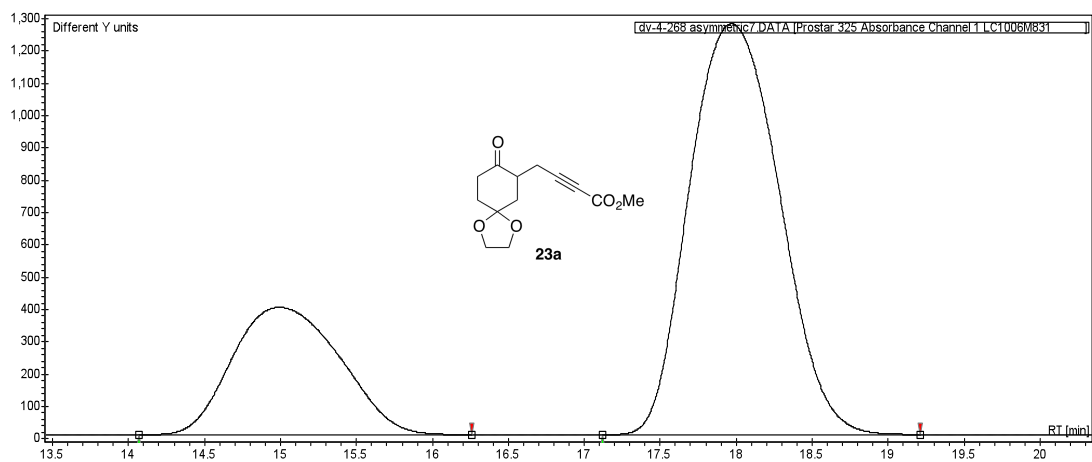

| # | Time [Min] | Quantity [% Area] | Height [mAU] | Area [mAU.Min] | Area % [%] |
|---|------------|-------------------|--------------|----------------|------------|
| 1 | 14.99      | 27.06             | 394.3        | 324.5          | 27.061     |
| 2 | 17.97      | 72.94             | 1271.8       | 874.6          | 72.939     |

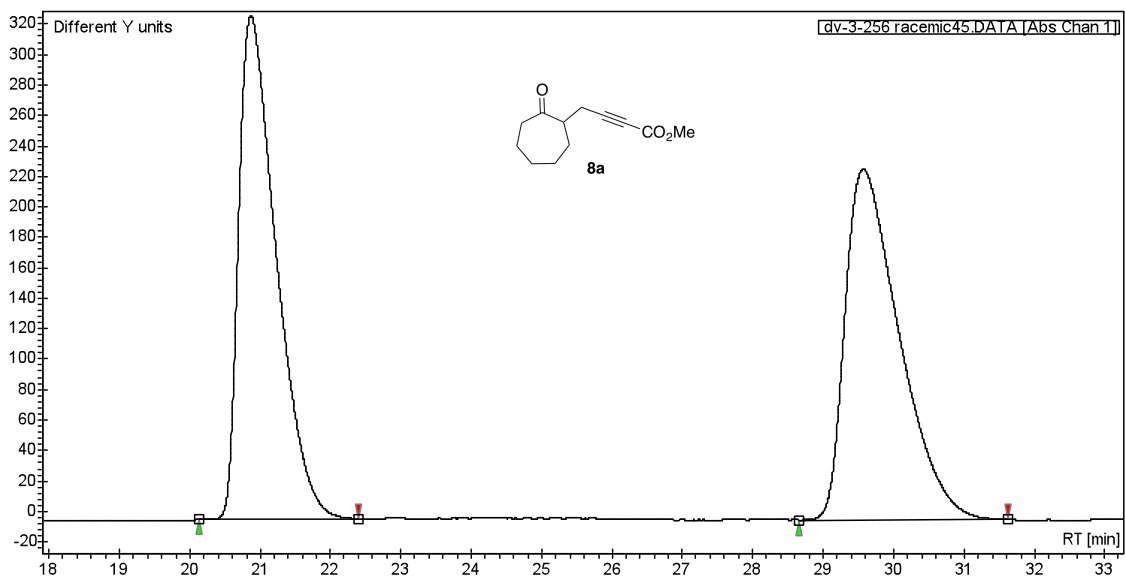

| # | Time [Min] | Quantity [% Area] | Height [mAU] | Area [mAU.Min] | Area % [%] |
|---|------------|-------------------|--------------|----------------|------------|
| 1 | 20.87      | 49.88             | 330.9        | 204.3          | 49.883     |
| 2 | 29.57      | 50.12             | 230.4        | 205.2          | 50.117     |

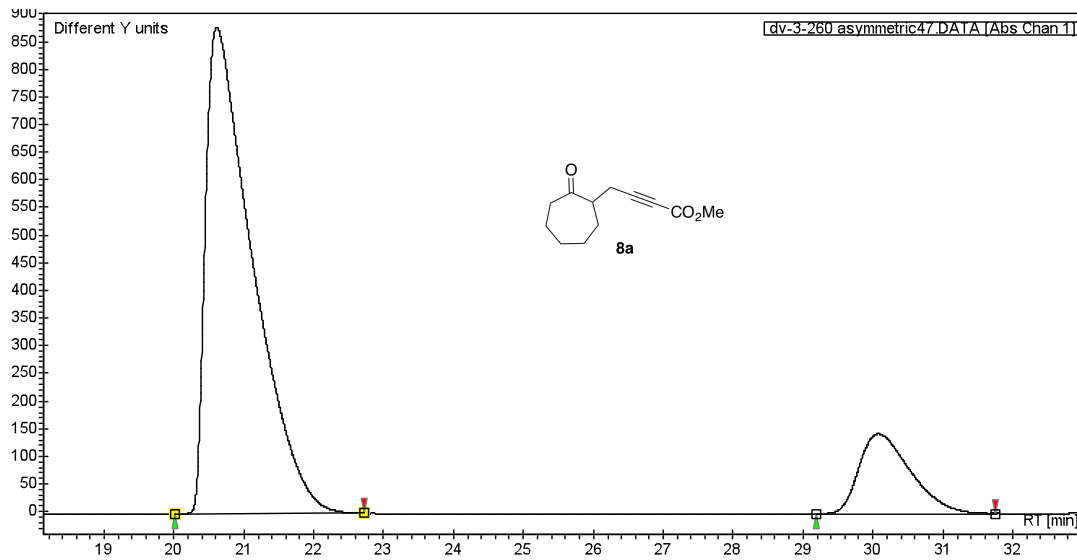

| # | Time [Min] | Quantity [% Area] | Height [mAU] | Area [mAU.Min] | Area % [%] |
|---|------------|-------------------|--------------|----------------|------------|
| 1 | 20.61      | 84.78             | 879.1        | 684.1          | 84.783     |
| 2 | 30.08      | 15.22             | 144.2        | 122.8          | 15.217     |

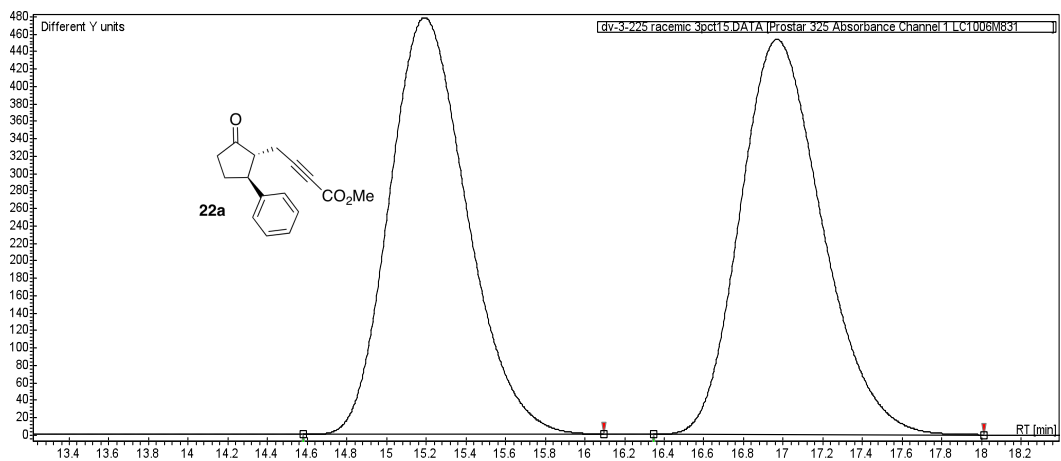

| # | Time [Min] | Quantity [% Area] | Height [mAU] | Area [mAU.Min] | Area % [%] |
|---|------------|-------------------|--------------|----------------|------------|
| 1 | 15.19      | 49.92             | 478.2        | 217.0          | 49.915     |
| 2 | 16.97      | 50.08             | 453.4        | 217.8          | 50.085     |

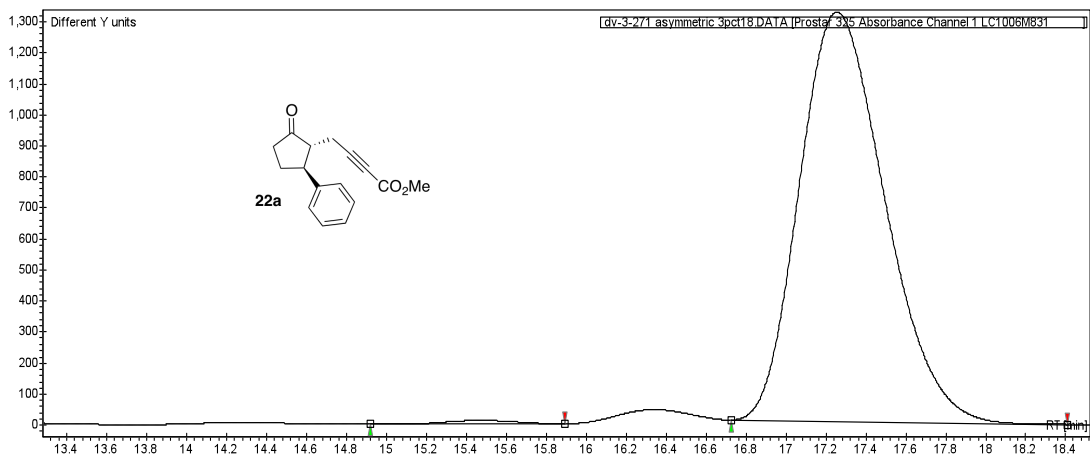

| # | Time [Min] | Quantity [% Area] | Height [mAU] | Area [mAU.Min] | Area % [%] |
|---|------------|-------------------|--------------|----------------|------------|
| 1 | 15.47      | 0.71              | 11.6         | 4.7            | 0.708      |
| 2 | 17.26      | 99.29             | 1321.3       | 654.0          | 99.292     |

### X-Ray Crystallographic Data for Compound 3.

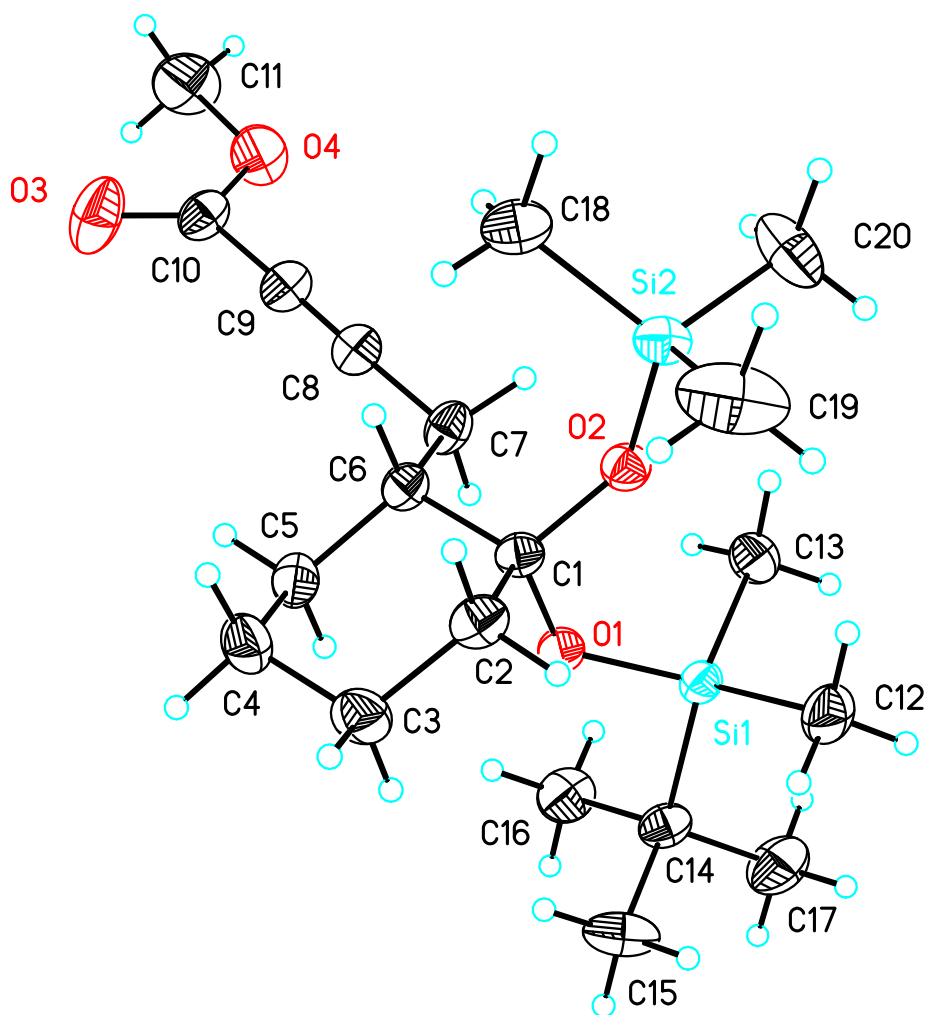

Table 1. Crystal data and structure refinement for YL\_9X.

|                                   |                                                                |          |
|-----------------------------------|----------------------------------------------------------------|----------|
| Identification code               | yl_9x                                                          |          |
| Empirical formula                 | C <sub>20</sub> H <sub>38</sub> O <sub>4</sub> Si <sub>2</sub> |          |
| Formula weight                    | 398.68                                                         |          |
| Temperature                       | 173(2) K                                                       |          |
| Wavelength                        | 1.54178 Å                                                      |          |
| Crystal system                    | Orthorhombic                                                   |          |
| Space group                       | P2(1)2(1)2(1)                                                  |          |
| Unit cell dimensions              | a = 8.1472(2) Å                                                | α = 90°. |
|                                   | b = 11.3292(3) Å                                               | β = 90°. |
|                                   | c = 26.4033(7) Å                                               | γ = 90°. |
| Volume                            | 2437.06(11) Å <sup>3</sup>                                     |          |
| Z                                 | 4                                                              |          |
| Density (calculated)              | 1.087 Mg/m <sup>3</sup>                                        |          |
| Absorption coefficient            | 1.474 mm <sup>-1</sup>                                         |          |
| F(000)                            | 872                                                            |          |
| Crystal size                      | 0.34 x 0.10 x 0.04 mm <sup>3</sup>                             |          |
| Theta range for data collection   | 3.35 to 67.95°.                                                |          |
| Index ranges                      | -9 ≤ h ≤ 8, -13 ≤ k ≤ 10, -29 ≤ l ≤ 27                         |          |
| Reflections collected             | 19192                                                          |          |
| Independent reflections           | 4059 [R(int) = 0.0223]                                         |          |
| Completeness to theta = 67.95°    | 96.1 %                                                         |          |
| Absorption correction             | Semi-empirical from equivalents                                |          |
| Max. and min. transmission        | 0.9434 and 0.6342                                              |          |
| Refinement method                 | Full-matrix least-squares on F <sup>2</sup>                    |          |
| Data / restraints / parameters    | 4059 / 0 / 236                                                 |          |
| Goodness-of-fit on F <sup>2</sup> | 1.040                                                          |          |
| Final R indices [I > 2σ(I)]       | R1 = 0.0305, wR2 = 0.0835                                      |          |
| R indices (all data)              | R1 = 0.0321, wR2 = 0.0848                                      |          |
| Absolute structure parameter      | 0.45(2)                                                        |          |
| Largest diff. peak and hole       | 0.265 and -0.157 e.Å <sup>-3</sup>                             |          |



Table 2. Atomic coordinates ( $\times 10^4$ ) and equivalent isotropic displacement parameters ( $\text{\AA}^2 \times 10^3$ ) for YL\_9X.  $U(\text{eq})$  is defined as one third of the trace of the orthogonalized  $U^{ij}$  tensor.

|       | x        | y        | z        | U(eq)  |
|-------|----------|----------|----------|--------|
| C(1)  | 7259(2)  | 9942(2)  | 8533(1)  | 34(1)  |
| C(2)  | 6046(2)  | 10284(2) | 8121(1)  | 44(1)  |
| C(3)  | 4887(2)  | 9279(2)  | 7989(1)  | 52(1)  |
| C(4)  | 5836(3)  | 8158(2)  | 7846(1)  | 53(1)  |
| C(5)  | 7016(2)  | 7821(2)  | 8267(1)  | 45(1)  |
| C(6)  | 8209(2)  | 8824(2)  | 8387(1)  | 36(1)  |
| C(7)  | 9422(2)  | 8495(2)  | 8807(1)  | 42(1)  |
| C(8)  | 10558(2) | 7554(2)  | 8667(1)  | 42(1)  |
| C(9)  | 11516(2) | 6790(2)  | 8565(1)  | 43(1)  |
| C(10) | 12642(2) | 5848(2)  | 8457(1)  | 45(1)  |
| C(11) | 15092(3) | 4932(2)  | 8691(1)  | 81(1)  |
| C(12) | 5596(3)  | 11967(2) | 9436(1)  | 55(1)  |
| C(13) | 8211(2)  | 10373(2) | 9888(1)  | 49(1)  |
| C(14) | 4618(2)  | 9516(2)  | 9866(1)  | 41(1)  |
| C(15) | 3002(2)  | 9559(2)  | 9573(1)  | 63(1)  |
| C(16) | 5169(3)  | 8232(2)  | 9911(1)  | 56(1)  |
| C(17) | 4345(3)  | 10009(2) | 10403(1) | 66(1)  |
| C(18) | 10649(3) | 10993(3) | 7803(1)  | 73(1)  |
| C(19) | 8317(3)  | 12989(3) | 8036(2)  | 104(1) |
| C(20) | 11030(4) | 12347(2) | 8776(1)  | 75(1)  |
| O(1)  | 6380(2)  | 9689(1)  | 8982(1)  | 36(1)  |
| O(2)  | 8353(1)  | 10878(1) | 8649(1)  | 38(1)  |
| O(3)  | 12458(2) | 5137(2)  | 8124(1)  | 79(1)  |
| O(4)  | 13877(2) | 5843(1)  | 8777(1)  | 66(1)  |
| Si(1) | 6247(1)  | 10403(1) | 9526(1)  | 33(1)  |
| Si(2) | 9527(1)  | 11772(1) | 8312(1)  | 40(1)  |

Table 3. Bond lengths [ $\text{\AA}$ ] and angles [ $^\circ$ ] for YL\_9X.

---

|              |            |
|--------------|------------|
| C(1)-O(1)    | 1.415(2)   |
| C(1)-O(2)    | 1.418(2)   |
| C(1)-C(2)    | 1.520(2)   |
| C(1)-C(6)    | 1.534(2)   |
| C(2)-C(3)    | 1.521(3)   |
| C(2)-H(2A)   | 0.9900     |
| C(2)-H(2B)   | 0.9900     |
| C(3)-C(4)    | 1.533(3)   |
| C(3)-H(3A)   | 0.9900     |
| C(3)-H(3B)   | 0.9900     |
| C(4)-C(5)    | 1.518(3)   |
| C(4)-H(4A)   | 0.9900     |
| C(4)-H(4B)   | 0.9900     |
| C(5)-C(6)    | 1.529(3)   |
| C(5)-H(5A)   | 0.9900     |
| C(5)-H(5B)   | 0.9900     |
| C(6)-C(7)    | 1.531(2)   |
| C(6)-H(6A)   | 1.0000     |
| C(7)-C(8)    | 1.460(3)   |
| C(7)-H(7A)   | 0.9900     |
| C(7)-H(7B)   | 0.9900     |
| C(8)-C(9)    | 1.195(3)   |
| C(9)-C(10)   | 1.437(3)   |
| C(10)-O(3)   | 1.202(3)   |
| C(10)-O(4)   | 1.314(3)   |
| C(11)-O(4)   | 1.447(3)   |
| C(11)-H(11A) | 0.9800     |
| C(11)-H(11B) | 0.9800     |
| C(11)-H(11C) | 0.9800     |
| C(12)-Si(1)  | 1.8650(19) |
| C(12)-H(12A) | 0.9800     |
| C(12)-H(12B) | 0.9800     |
| C(12)-H(12C) | 0.9800     |
| C(13)-Si(1)  | 1.8642(19) |

|                |            |
|----------------|------------|
| C(13)-H(13A)   | 0.9800     |
| C(13)-H(13B)   | 0.9800     |
| C(13)-H(13C)   | 0.9800     |
| C(14)-C(16)    | 1.528(3)   |
| C(14)-C(15)    | 1.528(3)   |
| C(14)-C(17)    | 1.539(3)   |
| C(14)-Si(1)    | 1.8915(18) |
| C(15)-H(15A)   | 0.9800     |
| C(15)-H(15B)   | 0.9800     |
| C(15)-H(15C)   | 0.9800     |
| C(16)-H(16A)   | 0.9800     |
| C(16)-H(16B)   | 0.9800     |
| C(16)-H(16C)   | 0.9800     |
| C(17)-H(17A)   | 0.9800     |
| C(17)-H(17B)   | 0.9800     |
| C(17)-H(17C)   | 0.9800     |
| C(18)-Si(2)    | 1.850(2)   |
| C(18)-H(18A)   | 0.9800     |
| C(18)-H(18B)   | 0.9800     |
| C(18)-H(18C)   | 0.9800     |
| C(19)-Si(2)    | 1.845(2)   |
| C(19)-H(19A)   | 0.9800     |
| C(19)-H(19B)   | 0.9800     |
| C(19)-H(19C)   | 0.9800     |
| C(20)-Si(2)    | 1.851(2)   |
| C(20)-H(20A)   | 0.9800     |
| C(20)-H(20B)   | 0.9800     |
| C(20)-H(20C)   | 0.9800     |
| O(1)-Si(1)     | 1.6502(12) |
| O(2)-Si(2)     | 1.6529(12) |
| O(1)-C(1)-O(2) | 106.80(13) |
| O(1)-C(1)-C(2) | 108.82(14) |
| O(2)-C(1)-C(2) | 111.84(14) |
| O(1)-C(1)-C(6) | 107.36(14) |
| O(2)-C(1)-C(6) | 110.75(13) |

|                  |            |
|------------------|------------|
| C(2)-C(1)-C(6)   | 111.05(14) |
| C(1)-C(2)-C(3)   | 112.13(16) |
| C(1)-C(2)-H(2A)  | 109.2      |
| C(3)-C(2)-H(2A)  | 109.2      |
| C(1)-C(2)-H(2B)  | 109.2      |
| C(3)-C(2)-H(2B)  | 109.2      |
| H(2A)-C(2)-H(2B) | 107.9      |
| C(2)-C(3)-C(4)   | 111.32(16) |
| C(2)-C(3)-H(3A)  | 109.4      |
| C(4)-C(3)-H(3A)  | 109.4      |
| C(2)-C(3)-H(3B)  | 109.4      |
| C(4)-C(3)-H(3B)  | 109.4      |
| H(3A)-C(3)-H(3B) | 108.0      |
| C(5)-C(4)-C(3)   | 110.34(17) |
| C(5)-C(4)-H(4A)  | 109.6      |
| C(3)-C(4)-H(4A)  | 109.6      |
| C(5)-C(4)-H(4B)  | 109.6      |
| C(3)-C(4)-H(4B)  | 109.6      |
| H(4A)-C(4)-H(4B) | 108.1      |
| C(4)-C(5)-C(6)   | 111.59(16) |
| C(4)-C(5)-H(5A)  | 109.3      |
| C(6)-C(5)-H(5A)  | 109.3      |
| C(4)-C(5)-H(5B)  | 109.3      |
| C(6)-C(5)-H(5B)  | 109.3      |
| H(5A)-C(5)-H(5B) | 108.0      |
| C(5)-C(6)-C(7)   | 112.37(15) |
| C(5)-C(6)-C(1)   | 110.20(14) |
| C(7)-C(6)-C(1)   | 110.19(14) |
| C(5)-C(6)-H(6A)  | 108.0      |
| C(7)-C(6)-H(6A)  | 108.0      |
| C(1)-C(6)-H(6A)  | 108.0      |
| C(8)-C(7)-C(6)   | 113.79(16) |
| C(8)-C(7)-H(7A)  | 108.8      |
| C(6)-C(7)-H(7A)  | 108.8      |
| C(8)-C(7)-H(7B)  | 108.8      |
| C(6)-C(7)-H(7B)  | 108.8      |

|                     |            |
|---------------------|------------|
| H(7A)-C(7)-H(7B)    | 107.7      |
| C(9)-C(8)-C(7)      | 177.9(2)   |
| C(8)-C(9)-C(10)     | 178.0(2)   |
| O(3)-C(10)-O(4)     | 124.29(19) |
| O(3)-C(10)-C(9)     | 124.4(2)   |
| O(4)-C(10)-C(9)     | 111.33(18) |
| O(4)-C(11)-H(11A)   | 109.5      |
| O(4)-C(11)-H(11B)   | 109.5      |
| H(11A)-C(11)-H(11B) | 109.5      |
| O(4)-C(11)-H(11C)   | 109.5      |
| H(11A)-C(11)-H(11C) | 109.5      |
| H(11B)-C(11)-H(11C) | 109.5      |
| Si(1)-C(12)-H(12A)  | 109.5      |
| Si(1)-C(12)-H(12B)  | 109.5      |
| H(12A)-C(12)-H(12B) | 109.5      |
| Si(1)-C(12)-H(12C)  | 109.5      |
| H(12A)-C(12)-H(12C) | 109.5      |
| H(12B)-C(12)-H(12C) | 109.5      |
| Si(1)-C(13)-H(13A)  | 109.5      |
| Si(1)-C(13)-H(13B)  | 109.5      |
| H(13A)-C(13)-H(13B) | 109.5      |
| Si(1)-C(13)-H(13C)  | 109.5      |
| H(13A)-C(13)-H(13C) | 109.5      |
| H(13B)-C(13)-H(13C) | 109.5      |
| C(16)-C(14)-C(15)   | 108.83(19) |
| C(16)-C(14)-C(17)   | 108.46(17) |
| C(15)-C(14)-C(17)   | 109.25(18) |
| C(16)-C(14)-Si(1)   | 109.67(13) |
| C(15)-C(14)-Si(1)   | 110.28(13) |
| C(17)-C(14)-Si(1)   | 110.30(15) |
| C(14)-C(15)-H(15A)  | 109.5      |
| C(14)-C(15)-H(15B)  | 109.5      |
| H(15A)-C(15)-H(15B) | 109.5      |
| C(14)-C(15)-H(15C)  | 109.5      |
| H(15A)-C(15)-H(15C) | 109.5      |
| H(15B)-C(15)-H(15C) | 109.5      |

|                     |            |
|---------------------|------------|
| C(14)-C(16)-H(16A)  | 109.5      |
| C(14)-C(16)-H(16B)  | 109.5      |
| H(16A)-C(16)-H(16B) | 109.5      |
| C(14)-C(16)-H(16C)  | 109.5      |
| H(16A)-C(16)-H(16C) | 109.5      |
| H(16B)-C(16)-H(16C) | 109.5      |
| C(14)-C(17)-H(17A)  | 109.5      |
| C(14)-C(17)-H(17B)  | 109.5      |
| H(17A)-C(17)-H(17B) | 109.5      |
| C(14)-C(17)-H(17C)  | 109.5      |
| H(17A)-C(17)-H(17C) | 109.5      |
| H(17B)-C(17)-H(17C) | 109.5      |
| Si(2)-C(18)-H(18A)  | 109.5      |
| Si(2)-C(18)-H(18B)  | 109.5      |
| H(18A)-C(18)-H(18B) | 109.5      |
| Si(2)-C(18)-H(18C)  | 109.5      |
| H(18A)-C(18)-H(18C) | 109.5      |
| H(18B)-C(18)-H(18C) | 109.5      |
| Si(2)-C(19)-H(19A)  | 109.5      |
| Si(2)-C(19)-H(19B)  | 109.5      |
| H(19A)-C(19)-H(19B) | 109.5      |
| Si(2)-C(19)-H(19C)  | 109.5      |
| H(19A)-C(19)-H(19C) | 109.5      |
| H(19B)-C(19)-H(19C) | 109.5      |
| Si(2)-C(20)-H(20A)  | 109.5      |
| Si(2)-C(20)-H(20B)  | 109.5      |
| H(20A)-C(20)-H(20B) | 109.5      |
| Si(2)-C(20)-H(20C)  | 109.5      |
| H(20A)-C(20)-H(20C) | 109.5      |
| H(20B)-C(20)-H(20C) | 109.5      |
| C(1)-O(1)-Si(1)     | 131.50(11) |
| C(1)-O(2)-Si(2)     | 134.90(11) |
| C(10)-O(4)-C(11)    | 115.21(19) |
| O(1)-Si(1)-C(13)    | 112.35(8)  |
| O(1)-Si(1)-C(12)    | 111.95(9)  |
| C(13)-Si(1)-C(12)   | 109.05(11) |

|                   |            |
|-------------------|------------|
| O(1)-Si(1)-C(14)  | 101.50(8)  |
| C(13)-Si(1)-C(14) | 110.41(9)  |
| C(12)-Si(1)-C(14) | 111.44(9)  |
| O(2)-Si(2)-C(19)  | 111.20(11) |
| O(2)-Si(2)-C(18)  | 112.63(10) |
| C(19)-Si(2)-C(18) | 109.51(16) |
| O(2)-Si(2)-C(20)  | 104.01(9)  |
| C(19)-Si(2)-C(20) | 110.58(15) |
| C(18)-Si(2)-C(20) | 108.78(14) |

---

Table 4. Anisotropic displacement parameters ( $\text{\AA}^2 \times 10^3$ ) for YL\_9X. The anisotropic displacement factor exponent takes the form:  $-2\pi^2 [ h^2 a^{*2} U^{11} + \dots + 2 h k a^* b^* U^{12} ]$

|       | U <sup>11</sup> | U <sup>22</sup> | U <sup>33</sup> | U <sup>23</sup> | U <sup>13</sup> | U <sup>12</sup> |
|-------|-----------------|-----------------|-----------------|-----------------|-----------------|-----------------|
| C(1)  | 33(1)           | 38(1)           | 33(1)           | 2(1)            | 3(1)            | 0(1)            |
| C(2)  | 41(1)           | 51(1)           | 39(1)           | 5(1)            | -2(1)           | 9(1)            |
| C(3)  | 42(1)           | 66(1)           | 49(1)           | -2(1)           | -11(1)          | -1(1)           |
| C(4)  | 55(1)           | 58(1)           | 47(1)           | -11(1)          | -7(1)           | -9(1)           |
| C(5)  | 51(1)           | 41(1)           | 43(1)           | -6(1)           | 2(1)            | 0(1)            |
| C(6)  | 38(1)           | 39(1)           | 32(1)           | -1(1)           | 2(1)            | 3(1)            |
| C(7)  | 46(1)           | 44(1)           | 37(1)           | -2(1)           | -3(1)           | 13(1)           |
| C(8)  | 45(1)           | 43(1)           | 37(1)           | 3(1)            | 0(1)            | 5(1)            |
| C(9)  | 47(1)           | 42(1)           | 41(1)           | 6(1)            | 2(1)            | 8(1)            |
| C(10) | 51(1)           | 40(1)           | 45(1)           | 6(1)            | 9(1)            | 10(1)           |
| C(11) | 56(1)           | 60(2)           | 127(3)          | 4(2)            | -10(2)          | 23(1)           |
| C(12) | 59(1)           | 33(1)           | 72(2)           | 0(1)            | 9(1)            | 9(1)            |
| C(13) | 43(1)           | 57(1)           | 47(1)           | -8(1)           | -8(1)           | -3(1)           |
| C(14) | 38(1)           | 45(1)           | 40(1)           | 7(1)            | 7(1)            | 4(1)            |
| C(15) | 34(1)           | 80(2)           | 75(2)           | 26(1)           | 4(1)            | -6(1)           |
| C(16) | 62(1)           | 45(1)           | 59(1)           | 14(1)           | 13(1)           | 0(1)            |
| C(17) | 71(2)           | 77(2)           | 52(1)           | 2(1)            | 22(1)           | 6(1)            |
| C(18) | 66(2)           | 83(2)           | 69(2)           | -5(1)           | 31(1)           | -19(1)          |
| C(19) | 62(2)           | 78(2)           | 170(3)          | 78(2)           | -3(2)           | 9(1)            |
| C(20) | 89(2)           | 66(2)           | 69(2)           | 8(1)            | -17(1)          | -39(1)          |
| O(1)  | 36(1)           | 38(1)           | 34(1)           | 0(1)            | 4(1)            | -3(1)           |
| O(2)  | 38(1)           | 36(1)           | 39(1)           | 2(1)            | 4(1)            | -1(1)           |
| O(3)  | 96(1)           | 74(1)           | 66(1)           | -19(1)          | -11(1)          | 39(1)           |
| O(4)  | 53(1)           | 54(1)           | 90(1)           | -6(1)           | -18(1)          | 17(1)           |
| Si(1) | 32(1)           | 31(1)           | 36(1)           | -2(1)           | 3(1)            | 3(1)            |
| Si(2) | 35(1)           | 38(1)           | 46(1)           | 11(1)           | 1(1)            | 1(1)            |



Table 5. Hydrogen coordinates ( $\times 10^4$ ) and isotropic displacement parameters ( $\text{\AA}^2 \times 10^{-3}$ ) for YL\_9X.

|        | x     | y     | z     | U(eq) |
|--------|-------|-------|-------|-------|
| H(2A)  | 6658  | 10522 | 7814  | 52    |
| H(2B)  | 5397  | 10972 | 8236  | 52    |
| H(3A)  | 4180  | 9518  | 7702  | 62    |
| H(3B)  | 4169  | 9111  | 8283  | 62    |
| H(4A)  | 5054  | 7504  | 7786  | 64    |
| H(4B)  | 6455  | 8296  | 7529  | 64    |
| H(5A)  | 7644  | 7113  | 8164  | 54    |
| H(5B)  | 6384  | 7620  | 8575  | 54    |
| H(6A)  | 8853  | 8999  | 8074  | 44    |
| H(7A)  | 10064 | 9205  | 8900  | 51    |
| H(7B)  | 8797  | 8246  | 9110  | 51    |
| H(11A) | 15959 | 4995  | 8947  | 121   |
| H(11B) | 15570 | 5030  | 8353  | 121   |
| H(11C) | 14570 | 4155  | 8715  | 121   |
| H(12A) | 6464  | 12402 | 9259  | 82    |
| H(12B) | 5394  | 12330 | 9767  | 82    |
| H(12C) | 4587  | 11990 | 9234  | 82    |
| H(13A) | 8559  | 9553  | 9937  | 74    |
| H(13B) | 8049  | 10749 | 10218 | 74    |
| H(13C) | 9057  | 10802 | 9698  | 74    |
| H(15A) | 2170  | 9096  | 9753  | 94    |
| H(15B) | 3166  | 9230  | 9234  | 94    |
| H(15C) | 2633  | 10380 | 9545  | 94    |
| H(16A) | 4322  | 7775  | 10087 | 83    |
| H(16B) | 6197  | 8193  | 10103 | 83    |
| H(16C) | 5340  | 7903  | 9572  | 83    |
| H(17A) | 3500  | 9541  | 10575 | 100   |
| H(17B) | 3986  | 10833 | 10381 | 100   |
| H(17C) | 5373  | 9965  | 10594 | 100   |
| H(18A) | 9864  | 10686 | 7554  | 109   |

|        |       |       |      |     |
|--------|-------|-------|------|-----|
| H(18B) | 11274 | 10336 | 7948 | 109 |
| H(18C) | 11404 | 11543 | 7636 | 109 |
| H(19A) | 7722  | 13401 | 8306 | 156 |
| H(19B) | 7532  | 12670 | 7790 | 156 |
| H(19C) | 9056  | 13544 | 7865 | 156 |
| H(20A) | 10449 | 12766 | 9046 | 113 |
| H(20B) | 11786 | 12890 | 8606 | 113 |
| H(20C) | 11652 | 11688 | 8921 | 113 |

---

Table 6. Torsion angles [°] for YL\_9X.

---

|                        |             |
|------------------------|-------------|
| O(1)-C(1)-C(2)-C(3)    | -63.2(2)    |
| O(2)-C(1)-C(2)-C(3)    | 179.07(15)  |
| C(6)-C(1)-C(2)-C(3)    | 54.8(2)     |
| C(1)-C(2)-C(3)-C(4)    | -54.6(2)    |
| C(2)-C(3)-C(4)-C(5)    | 55.2(2)     |
| C(3)-C(4)-C(5)-C(6)    | -57.1(2)    |
| C(4)-C(5)-C(6)-C(7)    | -179.36(16) |
| C(4)-C(5)-C(6)-C(1)    | 57.3(2)     |
| O(1)-C(1)-C(6)-C(5)    | 63.41(18)   |
| O(2)-C(1)-C(6)-C(5)    | 179.66(14)  |
| C(2)-C(1)-C(6)-C(5)    | -55.44(19)  |
| O(1)-C(1)-C(6)-C(7)    | -61.16(18)  |
| O(2)-C(1)-C(6)-C(7)    | 55.10(19)   |
| C(2)-C(1)-C(6)-C(7)    | 179.99(15)  |
| C(5)-C(6)-C(7)-C(8)    | 65.8(2)     |
| C(1)-C(6)-C(7)-C(8)    | -170.86(16) |
| C(6)-C(7)-C(8)-C(9)    | 169(6)      |
| C(7)-C(8)-C(9)-C(10)   | 76(10)      |
| C(8)-C(9)-C(10)-O(3)   | 96(7)       |
| C(8)-C(9)-C(10)-O(4)   | -82(7)      |
| O(2)-C(1)-O(1)-Si(1)   | 11.1(2)     |
| C(2)-C(1)-O(1)-Si(1)   | -109.80(16) |
| C(6)-C(1)-O(1)-Si(1)   | 129.92(13)  |
| O(1)-C(1)-O(2)-Si(2)   | -168.37(11) |
| C(2)-C(1)-O(2)-Si(2)   | -49.4(2)    |
| C(6)-C(1)-O(2)-Si(2)   | 75.04(19)   |
| O(3)-C(10)-O(4)-C(11)  | 2.7(3)      |
| C(9)-C(10)-O(4)-C(11)  | -179.03(19) |
| C(1)-O(1)-Si(1)-C(13)  | -68.60(17)  |
| C(1)-O(1)-Si(1)-C(12)  | 54.51(17)   |
| C(1)-O(1)-Si(1)-C(14)  | 173.47(15)  |
| C(16)-C(14)-Si(1)-O(1) | 58.20(15)   |
| C(15)-C(14)-Si(1)-O(1) | -61.64(17)  |
| C(17)-C(14)-Si(1)-O(1) | 177.60(14)  |

|                         |             |
|-------------------------|-------------|
| C(16)-C(14)-Si(1)-C(13) | -61.13(17)  |
| C(15)-C(14)-Si(1)-C(13) | 179.04(16)  |
| C(17)-C(14)-Si(1)-C(13) | 58.27(17)   |
| C(16)-C(14)-Si(1)-C(12) | 177.52(15)  |
| C(15)-C(14)-Si(1)-C(12) | 57.69(19)   |
| C(17)-C(14)-Si(1)-C(12) | -63.08(17)  |
| C(1)-O(2)-Si(2)-C(19)   | 79.8(2)     |
| C(1)-O(2)-Si(2)-C(18)   | -43.54(19)  |
| C(1)-O(2)-Si(2)-C(20)   | -161.16(17) |

---
